# Supplementary material for: Emerging membrane technologies for sustainable water treatment: a review on recent advances
Source: Royal Society of Chemistry journal article supplement (doi:10.1039/d4va00378k), 2025-01-01
Supplement: d4va00378k1.pdf [file d4va00378k1.pdf]

## **Emerging Membrane Technologies for Sustainable Water Treatment: A Review of Recent Advances**

**Sahar Foorginezhad <sup>a\*</sup>, Mohammad Mahdi Zerafat <sup>b\*</sup>, Ahmad Fauzi Ismail <sup>c\*</sup>, Pei Sean Goh <sup>c</sup>**

<sup>a</sup> Department of Engineering Sciences and Mathematics, Luleå University of Technology, Energy Science, 97187, Luleå, Sweden

<sup>b</sup> Faculty of Advanced Technologies, Nano-Chemical Engineering Department, Shiraz University, Shiraz 7194684560, Iran

<sup>c</sup> Advanced Membrane Technology Research Centre (AMTEC), Faculty of Chemical and Energy Engineering, Universiti Teknologi Malaysia, 81310 UTM Johor Bahru, Johor, Malaysia

\*Corresponding authors:

Sahar Foorginezhad: Email = [Sahar.foorginezhad@ltu.se](mailto:Sahar.foorginezhad@ltu.se)

Mohammad Mahdi Zerafat: Email = [mmzerafat@shirazu.ac.ir](mailto:mmzerafat@shirazu.ac.ir)

Ahmad Fauzi Ismail: Email = [afauzi@utm.my](mailto:afauzi@utm.my)

**Table S1.** Nanocomposite membranes used for desalination and heavy metals removal in 2023-2024.

| Membrane matrix                     | Average surface roughness (nm) | Charge (mV) | Pore size (nm) | NP                                | Loading   | Permeability |          | Improvement /Reduction (%) | Pollutant                                                                      | Rejection (%)             |                          | Improvement/Reduction (%)  | Ref. |
|-------------------------------------|--------------------------------|-------------|----------------|-----------------------------------|-----------|--------------|----------|----------------------------|--------------------------------------------------------------------------------|---------------------------|--------------------------|----------------------------|------|
|                                     |                                |             |                |                                   |           | Before NP    | After NP |                            |                                                                                | Before NP                 | After NP                 |                            |      |
|                                     |                                |             |                |                                   |           | PSF/PA       | 66       |                            |                                                                                | -60                       | 0.686                    |                            |      |
| PSF/PA                              | 14.6                           | -28         | ~0.3           | $\beta$ -cyclodextrin nano-sheets | 0.02      | 8.79         | 21.46    | 144.14                     | Na <sub>2</sub> SO <sub>4</sub>                                                | 97.93                     | 98.18                    | 0.26                       | (2)  |
| PSF/PA                              | 13.5                           | -30         | -              | Sulfonated-MoS <sub>2</sub>       | 0.019     | ~5.00        | 6.80     | 36.00                      | Na <sub>2</sub> SO <sub>4</sub> , MgSO <sub>4</sub> , MgCl <sub>2</sub> , NaCl | ~96, ~94, ~29, ~15        | 98.8, 95.5, 31.4, 13.2   | 2.92, 1.60, 8.28, -12      | (3)  |
| Poly(m-phenylene isophthalamide)/PA | 18.5                           | -           | -              | MOF-808                           | 0.02      | 13.50        | 17.63    | 30.59                      | Na <sub>2</sub> SO <sub>4</sub>                                                | 94.64                     | 97.67                    | 3.20                       | (4)  |
| PSF hollow fiber/PA                 | 8.4                            | -38         | 1.06           | CuBTC                             | 0.2       | 4.41         | 16.61    | 276.64                     | Arsenate                                                                       | 84.9                      | 85.8                     | 1.06                       | (5)  |
| PSF hollow fiber/PA                 | -                              | -13         | 0.3            | 4-sulfocalix (4) arene            | 5         | 1.95         | 4.17     | 113.85                     | NaCl                                                                           | 97.6                      | 98.8                     | 1.23                       | (6)  |
| PES/PA                              | 18.6                           | -           | 0.34           | ZIF-8                             | 0.15 w/v% | 1.26         | 2.52     | 100                        | NaCl                                                                           | 98.38                     | 98.3                     | -0.08                      | (7)  |
| PES/PA                              | -                              | -           | -              | Graphene oxide                    | 0.3       | ~4.5         | ~8.2     | 82.22                      | Na <sub>2</sub> SO <sub>4</sub> , NaCl, Cr <sup>2+</sup> , Ni <sup>2+</sup>    | 76.67, 21.65, 80.15, 68.7 | 98.94, 34.8, 97.5, 83.37 | 29.05, 60.74, 21.65, 21.35 | (8)  |
| PES/PA                              | -                              | -           | -              | AlFu MOF                          | 0.5       | ~3.5         | ~7.5     | 114.29                     | Na <sub>2</sub> SO <sub>4</sub> , NaCl, Cr <sup>2+</sup> , Ni <sup>2+</sup>    | 76.67, 21.65, 80.15, 68.7 | 87.74, 29.56, 89.8, 78.5 | 14.44, 36.54, 12.04, 14.26 | (8)  |
| PES                                 | 28.8                           | -           | 103.60         | GO-ZnO                            | 1         | 575          | 550      | -4.35                      | NaCl, MgSO <sub>4</sub>                                                        | 8, ~9                     | ~14, ~17                 | 75, 88.89                  | (9)  |

|                              |       |          |        |                                                                          |                                       |        |        |        |                                                                                       |                                |                             |                                    |      |
|------------------------------|-------|----------|--------|--------------------------------------------------------------------------|---------------------------------------|--------|--------|--------|---------------------------------------------------------------------------------------|--------------------------------|-----------------------------|------------------------------------|------|
| PVP                          | 31.2  | -        | 127.40 | GO-ZnO                                                                   | 1                                     | 700    | 937.5  | 33.93  | NaCl,<br>MgSO <sub>4</sub>                                                            | ~9,<br>~11                     | ~13,<br>~16                 | 44.44,<br>45.45                    | (9)  |
| PSF/PVA                      | 2.9   | -25.90   | -      | GO                                                                       | 1                                     | 1      | 14.3   | 1330   | As <sup>3+</sup> ,<br>NaCl,<br>MgSO <sub>4</sub> ,<br>Na <sub>2</sub> SO <sub>4</sub> | ~47.1,<br>46.1,<br>67,<br>89.1 | 88.4,<br>60,<br>74.5,<br>92 | 87.69,<br>30.15,<br>11.19,<br>3.25 | (10) |
| PSF/PA                       | 73.5  | -        | 0.27   | Ag                                                                       | 14.3<br>( $\mu\text{g}/\text{cm}^2$ ) | 3.8    | 4.2    | 10.53  | NaCl                                                                                  | 98.1                           | 98.1                        | 0                                  | (11) |
| PSF/PA                       | 19.5  | -(22-25) | 0.52   | Acyl<br>chloride@M<br>oS <sub>2</sub>                                    | 0.0125                                | 9.3    | 27.1   | 191.40 | Na <sub>2</sub> SO <sub>4</sub>                                                       | 97                             | 98.6                        | 1.65                               | (12) |
| PSF/PA                       | 66.56 | -32.10   | -      | N-doped<br>graphene<br>QD                                                | 0.01                                  | ~4.2   | ~5.6   | 33.33  | Na <sub>2</sub> SO <sub>4</sub>                                                       | ~96                            | ~98                         | 2.08                               | (13) |
| PSF/PA                       | ~45   | -        | -      | GO<br>assembled<br>with 1,3-<br>diamino-2-<br>propanol                   | 50 mg/l                               | ~1.94  | ~2.13  | 9.79   | NaCl                                                                                  | 99                             | 99.3                        | 0.30                               | (14) |
| PES/PA                       | 7.89  | -24      | -      | g-<br>C <sub>3</sub> N <sub>4</sub> /CuFe <sub>2</sub><br>O <sub>4</sub> | 0.01                                  | 3.8    | 9.2    | 142.11 | Na <sub>2</sub> SO <sub>4</sub> ,<br>Cd <sup>2+</sup>                                 | 49,<br>51                      | 94,<br>96                   | 91.84,<br>88.24                    | (15) |
| PVDF-<br>grafting-<br>PAA/PA | ~30   | -28      | 0.67   | UiO-66-<br>NH <sub>2</sub>                                               | -                                     | 15.33  | 43.60  | 184.41 | Mo(VI),<br>NaCl,<br>Na <sub>2</sub> SO <sub>4</sub>                                   | ~65,<br>28.6,<br>95.5          | 98.1,<br>30.8,<br>96.5      | 50.92,<br>7.69,<br>1.05            | (16) |
| PSF/PA                       | 87.9  | -38      | -      | Tannic acid-<br>ZIF-8                                                    | 0.01                                  | 2.06   | 3.55   | 72.33  | NaCl                                                                                  | 97                             | 99.5                        | 2.58                               | (17) |
| PSF/PA                       | -     | -40      | -      | ZIF-8                                                                    | 0.02                                  | 7.78   | 9.91   | 27.38  | Na <sub>2</sub> SO <sub>4</sub>                                                       | 97                             | 97.89                       | 0.92                               | (18) |
| Poly (vinyl<br>butyral)      | 21.32 | -14      | 5.74   | SA-grafted<br>$\epsilon$ -MnO <sub>2</sub>                               | -                                     | 254.37 | 394.62 | 55.14  | Cd <sup>2+</sup>                                                                      | -                              | 98.55                       | -                                  | (19) |
| PSF/PA                       | 56.2  | -26      | 0.64   | UiO-66-OH                                                                | 10<br>( $\mu\text{g}/\text{cm}^2$ )   | 53.5   | 37.4   | -30.09 | MgCl <sub>2</sub> ,<br>MgSO <sub>4</sub> ,<br>Na <sub>2</sub> SO <sub>4</sub>         | 90,<br>97.7,<br>98.3           | 95,<br>99.2,<br>99.5        | 5.56,<br>1.54,<br>1.22             | (20) |

|        |       |          |       |                                                  |                     |                            |                            |       |                                                                                          |                             |                                 |                                   |      |
|--------|-------|----------|-------|--------------------------------------------------|---------------------|----------------------------|----------------------------|-------|------------------------------------------------------------------------------------------|-----------------------------|---------------------------------|-----------------------------------|------|
| PSF/PA | 18.8  | ~65      | 11.79 | O-MoS <sub>2</sub>                               | 0.09                | 156.59                     | 287.81                     | 83.80 | NaCl,<br>MgCl <sub>2</sub> ,<br>MgSO <sub>4</sub> ,<br>Na <sub>2</sub> SO <sub>4</sub>   | ~20,<br>~3,<br>~80,<br>~82  | ~19,<br>~15,<br>~82,<br>~98     | -5,<br>400,<br>2.50,<br>19.51     | (21) |
| PES/PA | 1.82  | -        | -     | (ZnFeCe)<br>layered<br>double<br>hydroxide       | 0.01                | ~11                        | ~22                        | 100   | MgSO <sub>4</sub> ,<br>Na <sub>2</sub> SO <sub>4</sub> ,<br>MgCl <sub>2</sub> ,<br>NaCl  | ~88,<br>~95,<br>~50,<br>~20 | 88.3,<br>98.3,<br>77.4,<br>22.1 | 0.34,<br>3.47,<br>54.80,<br>10.50 | (22) |
| PSF/PA | 56.4  | -38      | -     | Arg-doped<br>polydopamine                        | -                   | 2.59                       | 3.89                       | 50.19 | NaCl                                                                                     | ~70                         | 98.8                            | 41.14                             | (23) |
| PES/PA | 53.2  | -30      | 0.39  | Cyclodextrin<br>metal-<br>organic<br>framework   | 3 g/cm <sup>2</sup> | ~4                         | 24.4                       | 510   | Na <sub>2</sub> SO <sub>4</sub>                                                          | 95                          | 97.12                           | 2.23                              | (24) |
| PSF/PA | -     | -22      | -     | Silica                                           | 0.8                 | ~1                         | 3.65                       | 265   | NaCl                                                                                     | 95                          | 98.5                            | 3.68                              | (25) |
| PSF/PA | -     | -(16-24) | -     | Poly(amido<br>amine)-<br>halloysite<br>nanotubes | 0.025-0.1           | ~5.75                      | 4.6-5.65                   |       | Na <sub>2</sub> SO <sub>4</sub> ,<br>MgCl <sub>2</sub> ,<br>NaCl                         | 97,<br>82,<br>40            | 97-98,<br>82-90,<br>25-40       |                                   | (26) |
| PES/PA | 37.83 | -        | 0.45  | Zn-PDA-<br>MCF-5                                 | 0.25                | 4.20                       | 6.40                       | 52.38 | Na <sub>2</sub> SO <sub>4</sub> ,<br>MgCl <sub>2</sub> ,<br>NaCl                         | 92,<br>77,<br>66            | 95,<br>88,<br>86                | 3.26,<br>14.29,<br>30.30          | (27) |
| PES    | -     | -        | -     | MoO <sub>2</sub> @GO                             | -                   | -                          | 410                        | -     | NaCl,<br>MgCl <sub>2</sub> ,<br>Ni(NO <sub>3</sub> ) <sub>2</sub> ,<br>PbCl <sub>2</sub> | 40,<br>66,<br>90,<br>85     | 79,<br>82,<br>99,<br>98         | 97.5,<br>24.24,<br>10,<br>15.29   | (28) |
| PES    | -     | -        | -     | WO <sub>3</sub> @GO                              | -                   | -                          | 445                        | -     | NaCl,<br>MgCl <sub>2</sub> ,<br>Ni(NO <sub>3</sub> ) <sub>2</sub> ,<br>PbCl <sub>2</sub> | 40,<br>66,<br>90,<br>85     | 70,<br>75,<br>99,<br>98         | 75,<br>13.64,<br>10,<br>15.29     | (28) |
| CA     | -     | -        | -     | Titanate<br>nanowire                             | 5                   | 1.3<br>L/m <sup>2</sup> .h | 2.3<br>L/m <sup>2</sup> .h |       | NaCl                                                                                     | 95                          | 65                              | -31.58                            | (29) |
| PES/PA | 9.42  | -28      | 0.54  | MoS <sub>2</sub>                                 | 0.001               | 8.07                       | 10.45                      | 29.49 | Na <sub>2</sub> SO <sub>4</sub>                                                          | 97.10                       | 98.4                            | 1.34                              | (30) |

|                                                   |             |       |      |                                             |            |                                          |                                          |        |                                                                                              |                         |                          |                               |      |
|---------------------------------------------------|-------------|-------|------|---------------------------------------------|------------|------------------------------------------|------------------------------------------|--------|----------------------------------------------------------------------------------------------|-------------------------|--------------------------|-------------------------------|------|
| Pre-cast PS20 PSf/PA                              | 60          | -     | -    | ZIF-8                                       | 0.15       | ~2.1                                     | ~2.7                                     | 28.57  | NaCl                                                                                         | ~98                     | ~97                      | -1.02                         | (31) |
| PSF/PA                                            | 38.56       | -     | 0.6  | CNTs                                        | 0.015      | 0.94 m <sup>3</sup> /m <sup>2</sup> .day | 0.93 m <sup>3</sup> /m <sup>2</sup> .day |        | NaCl                                                                                         | 99.5                    | 99.77                    | 0.27                          | (32) |
| Polyphenylsulfone/Sulfonated polyphenylsulfone HF | 21          | -     | -    | TiO <sub>2</sub>                            | 2          | 2.5                                      | 5.4                                      | 116    | MgSO <sub>4</sub>                                                                            | 58                      | 95                       | 63.79                         | (33) |
| PSF/PA                                            | 5           | -20   | 0.3  | Amine-carbon dot                            | 0.05       | ~16.26                                   | 30.9                                     | 90.04  | Na <sub>2</sub> SO <sub>4</sub>                                                              | ~99                     | 99.4                     | 0.40                          | (34) |
| PES/TA-C <sub>3</sub> N <sub>4</sub> nano-sheets  | 34.9        | -65   | 0.58 | g-C <sub>3</sub> N <sub>4</sub> nano-sheets | -          | 21.03                                    | 34.25                                    | 62.86  | Na <sub>2</sub> SO <sub>4</sub>                                                              | 92.04                   | 98.53                    | 7.05                          | (35) |
| PES/PA                                            | 4.4         | -     | 0.53 | Exfoliated protonated MMT nano-clay         | 0.03       | ~1.62                                    | ~2.62                                    | 61.73  | Na, Mg, SO <sub>4</sub> , Cl                                                                 | ~37.5, ~50, ~39, ~40    | 80.8, 96.3, 85.7, 82     | 115.47, 92.60, 119.74, 105    | (36) |
| PES/PA                                            | -           | -     | -    | Ethylenediamine-GO impregnated              | 0.05       | -                                        | ~1.65                                    | -      | MgSO <sub>4</sub> , Na <sub>2</sub> SO <sub>4</sub> , NaCl                                   | ~85, ~87, ~38           | 98, 97, 63               | 15.29, 11.49, 65.79           | (37) |
| PSF/PEI                                           | 4.42        | 28.46 | 0.41 | SiO <sub>2</sub>                            | -          | ~37 p                                    | ~48                                      |        | MgCl <sub>2</sub>                                                                            | ~33                     | 95.2                     | 188.48                        | (38) |
| PA66/Piperazine                                   | -           | -9    | -    | NH <sub>2</sub> -nano-diamonds              | -          | 8.44-10                                  | 9.97-12.88                               |        | MgSO <sub>4</sub> , Na <sub>2</sub> SO <sub>4</sub> , MgCl <sub>2</sub> , NaCl               | ~97, ~95, ~43, ~38      | 98.14, 97.1, 55.31, 44.9 | 1.18, 2.21, 28.63, 18.16      | (39) |
| PES/PVP                                           | 4.05        | -     | 3.4  | Graphite                                    | 0.5        | ~0.64                                    | ~1.4                                     | 118.75 | -                                                                                            | 82                      | 91.79                    | 11.94                         | (40) |
| PVDF                                              | -           | 0.5   | -    | Ionic liquid-reduced GO                     | 0.5        | 58.62                                    | 85                                       | 45.00  | Cu <sup>2+</sup> , Cd <sup>2+</sup> , Zn <sup>2+</sup> , Mn <sup>2+</sup> , As <sup>3+</sup> | ~28, ~30, ~17, ~30, ~28 | 67, 96, 51, 65, 70       | 139.29, 220, 200, 116.67, 150 | (41) |
| PSF/PEI                                           | 46.56-87.03 | -     | -    | Ag <sub>2</sub> S                           | 0.005-0.05 | 1.50                                     | 1.90                                     | 26.67  | NaCl                                                                                         | 97.7                    | 98                       | 0.31                          | (42) |

|                                          |       |       |       |                               |      |       |        |        |                                                                                         |                                     |                                   |                                      |      |
|------------------------------------------|-------|-------|-------|-------------------------------|------|-------|--------|--------|-----------------------------------------------------------------------------------------|-------------------------------------|-----------------------------------|--------------------------------------|------|
| Cellulose diacetate                      | -     | -     | -     | Cellulose NCs                 | 0.50 | 0.6   | 4      | 566.67 | NaCl                                                                                    | 88                                  | 96                                | 9.10                                 | (43) |
| Polyphenylsulfone & PVP                  | 20.95 | -     | 1.61  | MXene                         | 0.6  | 0.91  | 3.7    | 306.59 | Cu <sup>2+</sup> ,<br>Cd <sup>2+</sup> ,<br>Pb <sup>2+</sup>                            | 97.7,<br>93.7,<br>92                | 97.4,<br>93.2,<br>93              | -0.31,<br>-0.53,<br>1.09             | (44) |
| P-carboxy phenyl amino maleimide with CA | -     | -     | -     | ZrO <sub>2</sub>              | 2    | 157   | 316.15 | 101.40 | NaCl                                                                                    | 57.94                               | 65.80                             | 13.57                                | (45) |
| PSF/PA                                   | 38.38 | -     | -     | MCM-41                        | 0.05 | 3.05  | 4.05   | 32.79  | Cu <sup>2+</sup> ,<br>Na <sup>+</sup>                                                   | 100,<br>96.88                       | 100,<br>96.46                     | 0,<br>-0.43                          | (46) |
| PSF/PA                                   | 27.3  | -     | -     | MXene                         | -    | ~12   | ~21    | 75     | Na <sub>2</sub> SO <sub>4</sub>                                                         | ~95                                 | ~97                               | 2.11                                 | (47) |
| PAN                                      | -     | -17   | 23.85 | Hyperbranched PEI-GO          | 1    | -     | -      | -      | Au <sup>3+</sup>                                                                        | -                                   | 88.57                             | -                                    | (48) |
| PAN/PVA/PA                               | 50.6  | -     | 0.36  | Polyvinyl alcohol/attapulgate | 3    | 15.6  | 22     | 41.03  | Na <sub>2</sub> SO <sub>4</sub> ,<br>MgSO <sub>4</sub> ,<br>MgCl <sub>2</sub> ,<br>NaCl | 78,<br>64,<br>56,<br>12             | 99.5,<br>99.5,<br>94,<br>25       | 27.56,<br>55.47,<br>67.86,<br>108.33 | (49) |
| PSF/PA                                   | 59.26 | -50   | -     | Chicken egg white albumin     | 0.3  | 1.47  | 1.76   | 19.73  | NaCl                                                                                    | 99.61                               | 99.66                             | 0.05                                 | (50) |
| PE/PA                                    | 52.3  | -18   | -     | TiO <sub>2</sub>              | 0.01 | 2.22  | 5.00   | 125.23 | NaCl,<br>MgSO <sub>4</sub> ,<br>Na <sub>2</sub> SO <sub>4</sub> ,<br>As <sup>5+</sup>   | 97.60,<br>98.00,<br>99.20,<br>67.50 | 98.80,<br>99.50,<br>99.80,<br>100 | 1.23,<br>1.53,<br>0.60,<br>48.15     | (51) |
| PSF                                      | -     | -     | -     | Amine, thiol-SiO <sub>2</sub> | 0.50 | -     | 6.70   |        | Cd <sup>2+</sup> ,<br>Pb <sup>2+</sup>                                                  | -                                   | 82.00,<br>99.00                   | -                                    | (52) |
| PSF/PA                                   | -     | -     | 86    | GO-silver                     | 0.15 | 0.60  | 2.40   | 300    | Salt                                                                                    | 93.50                               | 99.20                             | 6.10                                 | (53) |
| PSF/PA                                   | -     | -13.2 | -     | Cellulose NCs                 | 0.10 | >6.50 | >18.80 | 189.23 | Cd <sup>2+</sup> ,<br>Pb <sup>2+</sup>                                                  | 94.00,<br>88.80                     | 98.00,<br>95.00                   | 4.26,<br>6.98                        | (54) |

|                                                |         |       |        |                                                |         |                       |                           |         |                                                                                                             |                                     |                                     |                                          |      |
|------------------------------------------------|---------|-------|--------|------------------------------------------------|---------|-----------------------|---------------------------|---------|-------------------------------------------------------------------------------------------------------------|-------------------------------------|-------------------------------------|------------------------------------------|------|
| PSF/PA                                         | -       | -7.38 | 0.62   | N-doped<br>graphene<br>QDs                     | -       | 4.78                  | 17.30                     | 261.92  | Na <sub>2</sub> SO <sub>4</sub>                                                                             | 92.00                               | 99.70                               | 8.40                                     | (55) |
| PSF/PA                                         | 9.2     | -12   | 0.2    | Cellulose<br>NCs                               | 0.10    | 6.00                  | 16.00                     | 166.67  | Na <sub>2</sub> SO <sub>4</sub> ,<br>MgCl <sub>2</sub> ,<br>NaCl,<br>Cu <sup>2+</sup> ,<br>Pb <sup>2+</sup> | ~98,<br>~73,<br>~42,<br>~96,<br>~92 | ~99,<br>~74,<br>~43,<br>~97,<br>~96 | 1.02,<br>1.40,<br>2.38,<br>1.04,<br>4.35 | (56) |
| PES/Polyester                                  | 19.95   | -70   | 0.47   | Carboxymet<br>hyl<br>cellulose-<br>MIL-53 (Fe) | -       | ~22                   | 39.83                     | 81.05   | Na <sub>2</sub> SO <sub>4</sub> ,<br>NaCl                                                                   | ~68,<br>~21                         | 61.49,<br>17.22                     | -9.57,<br>-18                            | (57) |
| PES/Polyester                                  | 33.9    | -38   | -      | Tannic acid-<br>MXene                          | 0.01    | 9.2                   | 16.6                      | 80.43   | Na <sub>2</sub> SO <sub>4</sub> ,<br>MgSO <sub>4</sub>                                                      | ~96,<br>~94                         | 96.6,<br>~94                        | 0                                        | (58) |
| Poly(m-<br>phenylene<br>isophthalamid<br>e)/PA | 17      | -62   | -      | 2D boron<br>nitride<br>nanosheets              | 10 v/v% | 15.98                 | 18.18                     | 13.77   | Na <sub>2</sub> SO <sub>4</sub>                                                                             | 97.86                               | 97.5                                | -0.37                                    | (59) |
| Polyphenylsul<br>fone                          | 1.93    | -14   | 1      | Polyaniline                                    | 0.50    | ~2.00                 | ~4.25                     | 112.50  | Pb <sup>2+</sup> ,<br>Cu <sup>2+</sup>                                                                      | ~60,<br>~62                         | ~95,<br>~98                         | 58.33,<br>58.06                          | (60) |
| Polyphenyl<br>sulfone                          | 8-16.44 | -     | 130    | SiO <sub>2</sub>                               | 2.00    | ~7                    | ~40.73                    | 481.86  | NaCl                                                                                                        | ~95                                 | 94.90                               | -0.11                                    | (61) |
| PU                                             | 316     | -     | 2.8 μm | Laponite/G<br>O                                | 15      | 7.25                  | 132.85                    | 1732.41 | Pb <sup>2+</sup> ,<br>As <sup>5+</sup>                                                                      | ~22,<br>~18                         | 98,<br>95                           | 345.45,<br>427.78                        | (62) |
| PSF                                            | 40      | -     | -      | Sepiolite                                      | 4.5     | 0.232                 | 0.472                     | 103.45  | NaCl                                                                                                        | ~40                                 | ~74                                 | 85                                       | (63) |
| PVDF                                           | 26      | -     | 150    | Perfluorocety<br>lamine-<br>Graphene           | 0.7     | 5 L/m <sup>2</sup> .h | ~9<br>L/m <sup>2</sup> .h | 80      | NaCl                                                                                                        | ~99.7                               | ~99.86                              | 0.16                                     | (64) |

|          |      |        |      |                                                               |                            |                       |                             |        |                                                                                                    |                             |                               |                                     |      |  |
|----------|------|--------|------|---------------------------------------------------------------|----------------------------|-----------------------|-----------------------------|--------|----------------------------------------------------------------------------------------------------|-----------------------------|-------------------------------|-------------------------------------|------|--|
|          |      |        |      | nanosheets                                                    |                            |                       |                             |        |                                                                                                    |                             |                               |                                     |      |  |
| PVDF     | 44   | -      | 190  | Octylamine-<br>Graphene<br>nanosheets                         | 0.7                        | 5 L/m <sup>2</sup> .h | ~8.5<br>L/m <sup>2</sup> .h | 70     | NaCl                                                                                               | ~99.7                       | ~99.88                        | 0.18                                | (64) |  |
| PSF/PA   | 16.3 | -21.01 | 0.36 | Imine-based<br>covalent<br>organic<br>frameworks<br>nanosheet | 0.007                      | 6                     | 8.54                        | 42.33  | Na <sub>2</sub> SO <sub>4</sub>                                                                    | 97.1                        | ~98.1                         | 1.03                                | (65) |  |
| PES/PA   | 31.8 | -38    | -    | Tannic acid-<br>Fe <sup>3+</sup> -MCNT                        | 30<br>μg/cm <sup>2</sup>   | 1.1                   | 3.2                         | 190.91 | NaCl                                                                                               | ~97                         | ~99                           | 2.06                                | (66) |  |
| PVA/CA   | -    | -17    | -    | MIL-100<br>(Fe)                                               | 5                          | 9.25                  | 11.25                       | 21.62  | Na <sub>2</sub> SO <sub>4</sub> ,<br>MgSO <sub>4</sub> ,<br>Pb <sup>2+</sup> ,<br>Cd <sup>2+</sup> | ~68,<br>~60,<br>~90,<br>~83 | ~78,<br>~65,<br>93,<br>92     | 14.71,<br>8.33,<br>3.33,<br>10.84   | (67) |  |
| PAN/PEI  | 16.1 | -8     | 0.6  | rGO@Au                                                        | 0.025                      | ~94                   | ~10                         | -89.36 | NaCl,<br>Na <sub>2</sub> SO <sub>4</sub> ,<br>MgSO <sub>4</sub> ,<br>MgCl <sub>2</sub>             | ~54,<br>~60,<br>~85,<br>~81 | 91.5,<br>92,<br>96.5,<br>96.2 | 69.44,<br>53.33,<br>13.53,<br>18.77 | (68) |  |
| PVP, PSF | 22.2 | -      | 650  | ZIF-8                                                         | 1                          | 0.98                  | 2.22                        | 126.53 | NaCl,<br>Na <sub>2</sub> SO <sub>4</sub>                                                           | ~87,<br>~97                 | 94.2,<br>~97.5                | 8.28,<br>0.52                       | (69) |  |
| PES/PA   | 29.5 | -70    | 0.56 | MoS <sub>2</sub>                                              | 20.1<br>μg/cm <sup>2</sup> | ~37                   | 33.5                        | -9.46  | Na <sub>2</sub> SO <sub>4</sub>                                                                    | ~65                         | 97.5                          | 50                                  | (70) |  |
| PSF/PA   | 8.15 | -1.28  | -    | Titania<br>nanosheet                                          | -                          | ~0.98                 | 1.57                        | 60.20  | Cs <sup>+</sup>                                                                                    | 99                          | 100                           | 1.01                                | (71) |  |
| PSF/PA   | -    | -      | -    | Ag@Sodiu<br>m<br>alginate@ch                                  | -                          | ~5.8                  | ~6                          | 3.45   | NaCl                                                                                               | ~98                         | ~98                           | 0                                   | (72) |  |



|          |      |     |       |                                          |          |                           |                           |       |                                                                                                                                                        |                                                     |                                                     |                                                                   |      |  |
|----------|------|-----|-------|------------------------------------------|----------|---------------------------|---------------------------|-------|--------------------------------------------------------------------------------------------------------------------------------------------------------|-----------------------------------------------------|-----------------------------------------------------|-------------------------------------------------------------------|------|--|
|          |      |     |       | itosan                                   |          |                           |                           |       |                                                                                                                                                        |                                                     |                                                     |                                                                   |      |  |
| PSF      | 5.93 | -   | 4.45  | Chitosan/MWCNT                           | 0.1/0.75 | 16.29                     | 20.46                     | 25.60 | Na <sub>2</sub> SO <sub>4</sub>                                                                                                                        | 54.7                                                | 95.5                                                | 74.59                                                             | (73) |  |
| PVDF/PVP | -    | -   | -     | Montmorillonite                          | 5        | 13.8                      | 19.8                      | 43.48 | Pb <sup>2+</sup> ,<br>Cd <sup>2+</sup>                                                                                                                 | ~39,<br>~52                                         | 83,<br>87                                           | 112.82,<br>67.31                                                  | (74) |  |
| PSF/PA   | 78.6 | -54 | -     | Amine-multi walled carbon nanotube       | 0.02     | 2.33                      | 2.47                      | 6.01  | NaCl                                                                                                                                                   | 94                                                  | 97.5                                                | 3.72                                                              | (75) |  |
| CA       | -    | -   | -     | Amine-SiO <sub>2</sub>                   | 40       | -                         | -                         | -     | As <sup>5+</sup> ,<br>Cd <sup>2+</sup> ,<br>Pb <sup>2+</sup>                                                                                           | -                                                   | ~99,<br>~99,<br>~90                                 | -                                                                 | (76) |  |
| CA       | -    | -   | 5-200 | MnFe <sub>2</sub> O <sub>4</sub> -SWCNTS | 4        | 0.67<br>×10 <sup>4</sup>  | 1.01<br>×10 <sup>4</sup>  | 50.75 | Al <sup>3+</sup> ,<br>Zn <sup>2+</sup>                                                                                                                 | 42,<br>37                                           | 98,<br>94                                           | 133.33,<br>154.05                                                 | (77) |  |
| PSF      | 61.9 | -   | -     | TiO <sub>2</sub>                         | 0.05     | 12.5                      | 9                         | -28   | Pb <sup>2+</sup> ,<br>Cu <sup>2+</sup> ,<br>Co <sup>2+</sup> ,<br>Sr <sup>2+</sup> ,<br>NaCl,<br>Na <sub>2</sub> CO <sub>3</sub> ,<br>KNO <sub>3</sub> | ~45,<br>~53,<br>~62,<br>~33,<br>~37,<br>~45,<br>~39 | ~73,<br>~86,<br>~88,<br>~57,<br>~68,<br>~83,<br>~72 | 62.22,<br>62.26,<br>41.94,<br>72.73,<br>83.79,<br>84.44,<br>84.62 | (78) |  |
| PES      | 68.6 | -65 | 1.41  | TiO <sub>2</sub>                         | 1.5      | 7.59                      | 14.32                     | 88.67 | NaCl,<br>Na <sub>2</sub> SO <sub>4</sub> ,<br>MgCl <sub>2</sub> ,<br>MgSO <sub>4</sub>                                                                 | ~92,<br>~83,<br>~55,<br>~45                         | 44.5,<br>91.2,<br>54.1,<br>82.8                     | -51.63,<br>9.88,<br>-1.64,<br>84                                  | (79) |  |
| PSF/PA   | -    | -   | -     | Ag                                       | 4 mg/ml  | 11<br>L/m <sup>2</sup> .h | 33<br>L/m <sup>2</sup> .h | 200   | Na <sub>2</sub> SO <sub>4</sub>                                                                                                                        | ~97                                                 | 96.11                                               | -0.92                                                             | (80) |  |
| PLA      | -    | -   | -     | MIL-140                                  | 3        | 0.27                      | 0.54                      | 100   | NaCl                                                                                                                                                   | 99.87                                               | 99.83                                               | -0.04                                                             | (81) |  |

|                                                               |        |       |      |                                    |                             |       |       |        |                                                                                                                |                                     |                                      |                                               |      |
|---------------------------------------------------------------|--------|-------|------|------------------------------------|-----------------------------|-------|-------|--------|----------------------------------------------------------------------------------------------------------------|-------------------------------------|--------------------------------------|-----------------------------------------------|------|
| PSF/PA                                                        | 62     | -40   | -    | Sulfonated porous organic polymers | 0.005                       | 1.5   | 3.5   | 133.33 | NaCl                                                                                                           | >95.5                               | >97.5                                | 2.09                                          | (82) |
| PSF/PA                                                        | 18     | -5    | -    | Cellulose nanocrystals (CNC)       | 5 $\mu$ L CNC suspension    | ~100  | ~220  | 120    | MgCl <sub>2</sub> ,<br>MgSO <sub>4</sub> ,<br>Na <sub>2</sub> SO <sub>4</sub> ,<br>NaCl,<br>LiCl               | ~97,<br>~92,<br>~70,<br>~82,<br>~75 | ~94,<br>~92,<br>~78,<br>~80,<br>~78  | -3.09,<br>0,<br>11.43,<br>-2.44,<br>4         | (83) |
| PSF/PA                                                        | 171.56 | -31   | -    | Palygorskite                       | 1.3 mg/ml                   | 1.98  | 5.02  | 153.54 | NaCl                                                                                                           | 99.3                                | 99.1                                 | -0.20                                         | (84) |
| PSF/PA                                                        | 16.5   | -47.5 | 0.56 | Mesoporous silica nanosheet        | 0.1% w/v                    | ~9.5  | 22.5  | 136.84 | Na <sub>2</sub> SO <sub>4</sub> ,<br>MgSO <sub>4</sub> ,<br>CaCl <sub>2</sub> ,<br>MgCl <sub>2</sub> ,<br>NaCl | ~98,<br>~95,<br>~58,<br>~48,<br>~30 | 97.8,<br>~92,<br>~42,<br>~35,<br>~18 | -0.20,<br>-3.16,<br>-27.59,<br>-27.08,<br>-40 | (85) |
| PSF/PA<br>(Trimesoyl chloride, Piperazine)<br>(second layer)  | 52     | -70   | 0.67 | MOF-801                            | 3.4 $\mu$ g/cm <sup>2</sup> | 10.6  | 20.90 | 97.17  | Na <sub>2</sub> SO <sub>4</sub>                                                                                | 99.1                                | 97.5                                 | -1.61                                         | (86) |
| PSF 3500-P<br>Udel/<br>PA<br>(Trimesoyl chloride, Piperazine) | 33.49  | -     | -    | TiO <sub>2</sub> /Ag               | 0.05                        | ~0.27 | ~0.4  | 48.15  | Cr(NO <sub>3</sub> ) <sub>3</sub>                                                                              | ~94                                 | ~99                                  | 5.31                                          | (87) |
| PSF/PA                                                        | 74     | -     | -    | $\beta$ -                          | 0.1                         | -     | 2.68  | -      | NaCl                                                                                                           | -                                   | 99.40                                | -                                             | (88) |

---

|                                                     |                                                                                   |
|-----------------------------------------------------|-----------------------------------------------------------------------------------|
| (Trimesoyl<br>chloride, m-<br>phenylenedia<br>mine) | cyclodextrin<br>-modified<br>Mg <sub>2</sub> Al<br>layered<br>double<br>hydroxide |
|-----------------------------------------------------|-----------------------------------------------------------------------------------|

---

**Table S2.** Thin-film composite membranes used for desalination and heavy metals removal in 2023-2024.

| Membrane matrix                        | Average surface roughness (nm) | Charge (mV) | Pore size (nm) | Thin film                                                      | Permeability |           |                           | Pollutant                                                                     | Rejection (%)    |                    | Improvement/Reduction (%)   | Ref. |
|----------------------------------------|--------------------------------|-------------|----------------|----------------------------------------------------------------|--------------|-----------|---------------------------|-------------------------------------------------------------------------------|------------------|--------------------|-----------------------------|------|
|                                        |                                |             |                |                                                                | Support      | Composite | Improvement/Reduction (%) |                                                                               | Support          | TFC                |                             |      |
|                                        |                                |             |                |                                                                |              |           |                           |                                                                               |                  |                    |                             |      |
| PES                                    | 11.71                          | -28         | -              | Polyamide                                                      | ~1.1-1.8     | 1.89      |                           | NaCl                                                                          | ~86-97           | 97.4               | ~8.22                       | (89) |
| Poly(ethylene terephthalate)           | -                              | -           | -              | Polyamide                                                      | 86.27        | 73        | -15.38                    | NaCl                                                                          | 25.89            | 33                 | 27.46                       | (90) |
| Polyacrylonitrile                      | 10.1                           | -70         | 0.6            | Stevioside/trimesoyl chloride                                  | >81.2        | ~20       | -75.40                    | Na <sub>2</sub> SO <sub>4</sub>                                               | <~82             | ~90                | 9.76                        | (91) |
| PES                                    | -                              | -           | -              | Polyamide                                                      | -            | 1.51      |                           | NaCl                                                                          | -                | 97.8               | -                           | (92) |
| Polyethylene                           | 63.33                          | -12.5       | -              | Polyamide                                                      | 13.4         | ~4        | -70.15                    | NaCl, MgCl <sub>2</sub> , MgSO <sub>4</sub> , Na <sub>2</sub> SO <sub>4</sub> | ~6, ~8, ~12, ~19 | ~37, ~38, ~49, ~72 | 516.67, 375, 308.33, 278.94 | (93) |
| Sulfonated graphene oxide embedded PSF | -                              | -9.25       | 44             | Polyamide                                                      | ~0.49        | ~0.84     | 71.43                     | NaCl                                                                          | ~98              | ~95                | -3.06                       | (94) |
| PSF                                    | 45                             | -           | 0.48           | Polyamide (m-phenylene diamine, 1,3,5-benzenetriacyl chloride) | ~1.5         | ~3.2      | 113.33                    | NaCl                                                                          | ~95              | ~99                | 4.12                        | (95) |
| PES                                    | -                              | -11.2       | -              | Polyamide, dipeptide of zwitterionic                           | 0.7          | 18.93     | 2604.29                   | NaCl                                                                          | 96.25            | 98                 | 1.82                        | (96) |

|                   |       |       |      |                                                                                        |      |       |        |                                                                           |     |                   |       |       |
|-------------------|-------|-------|------|----------------------------------------------------------------------------------------|------|-------|--------|---------------------------------------------------------------------------|-----|-------------------|-------|-------|
|                   |       |       |      | amino acid L-arginine                                                                  |      |       |        |                                                                           |     |                   |       |       |
| PES               | -     | -     | -    | Polyamide                                                                              | -    | 0.57  |        | NaCl                                                                      | -   | 99.2              | -     | (97)  |
| PSF               | -     | -     | -    | Polymethyl acrylate grafted silica nanoparticles                                       | 2-5  | 2-5   | 0      | NaCl                                                                      | ~20 | >99               | 395   | (98)  |
| PSF               | -     | -     | -    | UiO-66-SO <sub>3</sub> H-incorporated polyamide                                        | ~1   | ~3.4  | 240    | NaCl                                                                      | ~96 | 94.7              | -1.35 | (99)  |
| PSF               | 45.62 | -28   | 0.34 | EMT-NH <sub>2</sub> zeolite (interlayer), Polyamide (Piperazine, Trimesoyl chloride)   | ~130 | ~13.8 | -89.30 | MgCl <sub>2</sub> , MgSO <sub>4</sub> , Na <sub>2</sub> SO <sub>4</sub>   | -   | 97.4, 98.4, 98.65 | -     | (100) |
| Polyacrylonitrile | 10.4  | -55.1 | -    | BaAlg hydrogel interlayer, Polyamide (piperazine, triethylamine, tricarbonyl chloride) | -    | 27.25 | -      | Na <sub>2</sub> SO <sub>4</sub>                                           | -   | 98.7              | -     | (101) |
| PES               | 52.5  | -18   | 0.38 | Polyamide (Polyethylene oxide, trimesoyl chloride,                                     | -    | 12.59 | -      | Na <sub>2</sub> SO <sub>4</sub> , MgCl <sub>2</sub> , MgSO <sub>4</sub> , | -   | 96, ~84.4, ~92.51 | -     | (102) |

|                                                                    |       |     |      |                                                                                               |   |       |   |                                                                                         |   |                                 |   |       |
|--------------------------------------------------------------------|-------|-----|------|-----------------------------------------------------------------------------------------------|---|-------|---|-----------------------------------------------------------------------------------------|---|---------------------------------|---|-------|
|                                                                    |       |     |      | piperazine)                                                                                   |   |       |   |                                                                                         |   |                                 |   |       |
|                                                                    |       |     |      | MXene-TiO <sub>2</sub><br>interlayer,<br>Polyamide<br>(piperazine,<br>trimesoyl<br>chloride)  | - | 11.10 | - | MgSO <sub>4</sub>                                                                       | - | 98.29                           | - | (103) |
| PSF                                                                | 19.6  | -45 | -    |                                                                                               |   |       |   |                                                                                         |   |                                 |   |       |
| NF90                                                               | 70.84 | -   | -    | Polypyrrole,<br>Carbon<br>nanotubes                                                           | - | 0.63  | - | NaCl                                                                                    | - | 53.00                           | - | (104) |
| NF270                                                              | 63.46 | -   | -    | Polypyrrole,<br>Carbon<br>nanotubes                                                           | - | 3.68  | - | NaCl                                                                                    | - | 38.40                           | - | (104) |
| PES                                                                | 5.48  | -75 | 0.54 | Piperazine,<br>1, 3, 5-<br>benzenetricarbo<br>nyl trichloride                                 | - | 23.70 | - | Na <sub>2</sub> SO <sub>4</sub> ,<br>MgSO <sub>4</sub> ,<br>NaCl                        | - | 95.40,<br>75.90,<br>5.80        | - | (105) |
| PES                                                                | -     | -15 | -    | Polyamide<br>(Piperazine,<br>1, 3, 5-<br>benzenetricarbo<br>nyl trichloride)<br>Tröger's base | - | 18.5  | - | Na <sub>2</sub> SO <sub>4</sub> ,<br>MgSO <sub>4</sub> ,<br>MgCl <sub>2</sub> ,<br>NaCl | - | 98.3,<br>93.9,<br>47.3,<br>23.9 | - | (106) |
| PSF (first layer),<br>Polycarboxylic<br>acid/ZIF-8<br>(interlayer) | 20.50 | -38 | -    | Polyamie<br>(1,3,5-<br>Benzenetricarbo<br>nyl trichloride,<br>1, 3-                           | - | 4.2   | - | NaCl                                                                                    | - | 98.8                            | - | (107) |

|                                   |      |       |      |                                                                                                |     |      |        |                                                                                                               |   |                                      |    |       |  |
|-----------------------------------|------|-------|------|------------------------------------------------------------------------------------------------|-----|------|--------|---------------------------------------------------------------------------------------------------------------|---|--------------------------------------|----|-------|--|
|                                   |      |       |      | phenylenediami<br>ne)                                                                          |     |      |        |                                                                                                               |   |                                      |    |       |  |
| Commercial PA-<br>TFC BWRO        | -    | -54   | -    | Poly(acrylic<br>acid)-polyamide                                                                | 2.9 | 1.69 | -41.72 | Nitrate,<br>Boron,<br>As (III),<br>As(V)                                                                      | - | 98,<br>90.7,<br>96,<br>99.6          | -  | (108) |  |
| PSF/polyester<br>terephthalate    | 8.95 | -1.50 | -    | Polyamide layer<br>(terephthaloyl<br>chloride, 1,2-<br>bis(3-<br>aminopropylami<br>no) ethane) | -   | ~6   | -      | MgCl <sub>2</sub> ,<br>Na <sub>2</sub> SO <sub>4</sub> ,<br>MgSO <sub>4</sub> ,<br>NaCl,<br>CaCl <sub>2</sub> | - | 92.7,<br>~75,<br>~90,<br>~78,<br>~73 | -  | (109) |  |
| PES                               | -    | -48   | -    | Polyamide<br>(Piperazine,<br>Trimesoyl<br>chloride)                                            | -   | 43.3 | -      | Na <sub>2</sub> SO <sub>4</sub>                                                                               | - | 99.3                                 | -  | (110) |  |
| PES                               | 9.6  | -18   | 1.21 | Poly (sodium 4-<br>styrenesulfonate<br>,<br>polyethyleneimi<br>ne)                             | -   | 74.5 | -      | Na <sub>2</sub> SO <sub>4</sub>                                                                               | - | 99.20                                | -- | (111) |  |
| Commercial<br>ceramic<br>membrane | -    | -     | -    | Polyamide<br>(Piperazine,<br>1,3,5-<br>benzenetricarbo<br>nyl trichloride)                     | -   | 42.9 | -      | Na <sub>2</sub> SO <sub>4</sub>                                                                               | - | 93.40                                | -  | (112) |  |
| Polyacrylonitrile<br>modified     | 20.7 | -     | -    | Polyamide (M-<br>phenylenediami                                                                | -   | 0.87 | -      | Na <sub>2</sub> SO <sub>4</sub> ,<br>NaCl                                                                     | - | 99,<br>98.1                          | -  | (113) |  |

|                                                                                                                   |      |     |      |                                                                                                                         |       |       |        |                                                                                         |      |                                       |   |       |
|-------------------------------------------------------------------------------------------------------------------|------|-----|------|-------------------------------------------------------------------------------------------------------------------------|-------|-------|--------|-----------------------------------------------------------------------------------------|------|---------------------------------------|---|-------|
| polydopamine                                                                                                      |      |     |      | ne,<br>Trimesoyl<br>chloride)                                                                                           |       |       |        |                                                                                         |      |                                       |   |       |
| PES                                                                                                               | 98.2 | -20 | 0.33 | Polyamide (M-<br>phenylenediami<br>ne,<br>Trimesoyl<br>chloride,<br>Sulfonated<br>polyaniline<br>(SPANI)<br>nanofibers) | -     | 35.35 | -      | Na <sub>2</sub> SO <sub>4</sub> ,<br>MgSO <sub>4</sub>                                  | -    | 98.95,<br>95.37                       | - | (114) |
| PSF                                                                                                               | 89.2 | -   | -    | Polyamide<br>(poly(TMC-co-<br>MPD-co-<br>poly(DADMAC<br>-co-DADA)))                                                     | ~0.38 | 1.29  | 239.47 | NaCl                                                                                    | ~88  | 93.10                                 | - | (115) |
| PES/sulfonated<br>PSF (first layer),<br>Polydopamine-<br>piperazine-<br>halloysite<br>nanotubes<br>(second layer) | 197  | -16 | 0.36 | Polyamide                                                                                                               | 15.87 | 45.3  | 185.44 | Na <sub>2</sub> SO <sub>4</sub>                                                         | 98.3 | 97.1                                  | - | (116) |
| Hydrolyzed<br>polyacrylonitrile                                                                                   | -    | -13 | 1.13 | Carbo-cationic<br>microporous<br>poly(triaminogu<br>anidinium-<br>amide)                                                | -     | 19    | -      | Na <sub>2</sub> SO <sub>4</sub> ,<br>MgSO <sub>4</sub> ,<br>MgCl <sub>2</sub> ,<br>NaCl | -    | 98.6,<br>99.1,<br>21.5-85,<br>41.6-85 | - | (117) |



|                                                                                 |      |       |      |                                                                             |   |       |   |                                                                                         |       |                                     |   |       |
|---------------------------------------------------------------------------------|------|-------|------|-----------------------------------------------------------------------------|---|-------|---|-----------------------------------------------------------------------------------------|-------|-------------------------------------|---|-------|
| Poly(vinylidene fluoride)/Carboxylic multiwalled carbon nanotubes (first layer) | 26.7 | -25   | 0.37 | Polyamide (Amino-functionalized graphene quantum dots, trimesoyl chloride)  | - | ~8    | - | Na <sub>2</sub> SO <sub>4</sub> ,<br>MgSO <sub>4</sub> ,<br>MgCl <sub>2</sub> ,<br>NaCl | -     | 65.68,<br>63.59,<br>21.64,<br>14.72 | - | (118) |
| Tannic acid/Fe (second layer)                                                   |      |       |      |                                                                             |   |       |   |                                                                                         |       |                                     |   |       |
| PSF                                                                             | 6.80 | -16.9 | -    | 1,3,5-benzenetricarbonyl trichloride, m-phenylenediamine, Silver nitrate    | - | ~1.37 | - | NaCl                                                                                    | 96.52 | 98.05                               | - | (119) |
| PSF                                                                             | -    | -25   | -    | Polyamide (trimesoyl chloride, m-phenylenediamine, nonionic surfactant TW)  | - | ~1.4  | - | NaCl                                                                                    | -     | ~92                                 | - | (120) |
| PSF                                                                             | 3.8  | -68.7 | -    | Polyamide (Piperazine, Trimesoyl chloride, Triaminoguanidine hydrochloride) | - | ~12   | - | Na <sub>2</sub> SO <sub>4</sub> ,<br>MgSO <sub>4</sub> ,<br>MgCl <sub>2</sub> ,<br>NaCl | -     | 99,<br>~97,<br>~43,<br>~42          | - | (121) |
| Single-walled carbon nanotube                                                   | 3.2  | -6    | 0.47 | Polyamide (tris (4-                                                         | - | 0.7   | - | NaCl,<br>MgCl <sub>2</sub> ,                                                            | -     | 96.80,<br>95.70,                    | - | (122) |

|     |   |      |      |  |                                                                                                                                       |   |      |   |                                                                                                      |                 |                             |   |       |
|-----|---|------|------|--|---------------------------------------------------------------------------------------------------------------------------------------|---|------|---|------------------------------------------------------------------------------------------------------|-----------------|-----------------------------|---|-------|
|     |   |      |      |  | aminophenyl<br>amine, 1,3,5-<br>trimesoyl<br>chloride, N, N'-<br>dimethylacetami<br>de, piperazine)                                   |   |      |   | Na <sub>2</sub> SO <sub>4</sub>                                                                      |                 | 97.70                       |   |       |
| PSF | - | 41.6 | -    |  | β-Cyclodextrin,<br>Terephthaloyl<br>chloride,<br>Tannic acid                                                                          | - | ~4.4 | - | Na <sub>2</sub> SO <sub>4</sub> ,<br>MgSO <sub>4</sub> ,<br>MgCl <sub>2</sub> ,<br>CaCl <sub>2</sub> | -               | 93,<br>92,<br>91,<br>84     | - | (123) |
| PSF | - | 7.16 | -    |  | β-Cyclodextrin,<br>Trimesoyl<br>chloride,<br>Tannic acid                                                                              | - | ~1   | - | Na <sub>2</sub> SO <sub>4</sub> ,<br>MgSO <sub>4</sub> ,<br>MgCl <sub>2</sub> ,<br>CaCl <sub>2</sub> | -               | ~79,<br>~80,<br>~80,<br>~80 | - | (123) |
| PSF | - | -4.5 | 0.42 |  | Polyamide<br>(Polyethyleneim<br>ine,<br>Terephthaloyl<br>chloride,<br>Piperazine)                                                     | - | 11   | - | Na <sub>2</sub> SO <sub>4</sub> ,<br>Heavy<br>metals                                                 | 55-82,<br>98-99 | 97.5,<br>98-99              | - | (124) |
| PSF | - | -40  | -    |  | Polyamide<br>(Terephthaloyl<br>chloride,<br>Triethylamine,<br>Piperazine,<br>N-(3-<br>Dimethylamino<br>propyl)-N'-<br>ethylcarbodiimi | - | 5.87 | - | Cr (VI),<br>Na <sub>2</sub> SO <sub>4</sub> ,<br>NaCl                                                | -               | 97,<br>97.7,<br>23.4        | - | (125) |

|                                    |      |      |      |                                                                                                                                                             |                            |       |        |                                                                                        |                           |                             |        |       |  |
|------------------------------------|------|------|------|-------------------------------------------------------------------------------------------------------------------------------------------------------------|----------------------------|-------|--------|----------------------------------------------------------------------------------------|---------------------------|-----------------------------|--------|-------|--|
|                                    |      |      |      | de<br>hydrochloride,<br>Hydroxysuccini<br>mide,<br>Ethylenediamin<br>e,<br>Graphene<br>oxide)                                                               |                            |       |        |                                                                                        |                           |                             |        |       |  |
| GO-PVDF<br>nanofibrous<br>membrane | -    | -0.3 | -    | Chitosan                                                                                                                                                    | -                          | 157.3 | -      | Mn (II)                                                                                | ~12                       | 90.7                        | 655.83 | (126) |  |
| PSF                                | -    | -4   | 0.41 | Polyamide<br>(Trimesoyl<br>chloride,<br>Poly(2-dimethyl<br>aminoethyl)met<br>hacrylate,<br>$\alpha,\alpha'$ -dichloro-p-<br>xylene,<br>Piperazineamide<br>) | -                          | 8     | -      | Na <sub>2</sub> SO <sub>4</sub> ,<br>MgCl <sub>2</sub> ,<br>NaCl,<br>Co (II)           | -                         | ~98,<br>92,<br>44,<br>98    | -      | (127) |  |
| PES                                | 10.3 | -38  | 0.61 | Polyamide<br>(Trimesoyl<br>chloride,<br>Piperazine)<br>Post treatment                                                                                       | -                          | ~10.5 | -      | MgCl <sub>2</sub> ,<br>NaCl,<br>MgSO <sub>4</sub> ,<br>Na <sub>2</sub> SO <sub>4</sub> | -                         | ~54,<br>~25,<br>~95,<br>~98 | -      | (128) |  |
| PSF                                | -    | -    | -    | Polyamide (m-<br>phenylenediami<br>ne, Trimesoyl                                                                                                            | 1.77<br>(without<br>Fe-TA) | 3.58  | 102.26 | Boron                                                                                  | ~99<br>(without<br>Fe-TA) | 98.37                       | -      | (129) |  |

|                                                                                                                                              |      |        |         |                                                                                                   |   |       |   |                                                                                         |   |                                 |   |       |
|----------------------------------------------------------------------------------------------------------------------------------------------|------|--------|---------|---------------------------------------------------------------------------------------------------|---|-------|---|-----------------------------------------------------------------------------------------|---|---------------------------------|---|-------|
|                                                                                                                                              |      |        |         | chloride),<br>Fe-TA complex                                                                       |   |       |   |                                                                                         |   |                                 |   |       |
| Polyacrylonitrile                                                                                                                            | -    | -      | 0.2-0.4 | Polyamide<br>(Trimesoyl<br>chloride,<br>Piperazine,<br>Triethylamine)                             | - | 13.30 | - | Na <sub>2</sub> SO <sub>4</sub> ,<br>MgSO <sub>4</sub> ,<br>MgCl <sub>2</sub> ,<br>NaCl | - | 98.2,<br>97.6,<br>80.7,<br>15.2 | - | (130) |
| PSF                                                                                                                                          | -    | -58.1  | -       | Polyamide<br>(Triethylamine,<br>m-<br>phenylenediami<br>ne,<br>cyclopentanecar<br>bonyl chloride) | - | 4.84  | - | NaCl                                                                                    | - | 98.28                           | - | (131) |
| PES (first layer),<br>Dopamine and<br>C <sub>19</sub> H <sub>39</sub> NO <sub>2</sub> -g-<br>C <sub>3</sub> N <sub>4</sub> (second<br>layer) | -    | -18    | 0.49    | Polyamide<br>(Polyethyleneim<br>ine, Trimesoyl<br>chloride)                                       | - | 12.33 | - | Mg (II)                                                                                 | - | 98.41                           | - | (132) |
| PSF                                                                                                                                          | -    | -10.97 | -       | Copolymer<br>poly(vinyl<br>alcohol-co-<br>styrenesulfonic<br>acid)<br>/Glutaraldehyde             | - | 3.22  | - | MgSO <sub>4</sub> ,<br>NaCl                                                             | - | 79.2,<br>54                     | - | (133) |
| PSF                                                                                                                                          | 7.06 | -      | -       | Polyamide<br>(Piperazine,<br>Trimesoyl<br>chloride,                                               | - | 7.09  | - | MgSO <sub>4</sub>                                                                       | - | 97.5                            | - | (134) |

|              |       |     |      |                                                                                                        |   |       |   |                                                                                                                        |   |                                              |   |       |
|--------------|-------|-----|------|--------------------------------------------------------------------------------------------------------|---|-------|---|------------------------------------------------------------------------------------------------------------------------|---|----------------------------------------------|---|-------|
|              |       |     |      | Triethylamine,<br>Phytic acid-<br>modified<br>graphene oxide)                                          |   |       |   |                                                                                                                        |   |                                              |   |       |
| PSF          | 10.31 | -40 | 0.2  | Polyamide (2-<br>methylimidazol<br>e, Piperazine,<br>Trimethyl<br>chloride)                            | - | 6.98  | - | Na <sub>2</sub> SO <sub>4</sub> ,<br>NaCl                                                                              | - | 99.5,<br>42.8                                | - | (135) |
| PSF          | 9.82  | 25  | 0.46 | Polyamide<br>(Polyethyleneim<br>ine, 1,3,5-<br>benzenetriacyl<br>chloride)                             | - | 3     | - | NaCl,<br>LiCl,<br>Na <sub>2</sub> SO <sub>4</sub> ,<br>MgSO <sub>4</sub> ,<br>CaCl <sub>2</sub> ,<br>MgCl <sub>2</sub> | - | ~65,<br>~60,<br>~64,<br>~95,<br>~98,<br>97.8 | - | (136) |
| Polyethylene | 30.4  | 25  | 0.5  | Polyamide<br>(Polyethyleneim<br>ine, 1,3,5-<br>benzenetriacyl<br>chloride)                             | - | 10.50 | - | NaCl,<br>LiCl,<br>Na <sub>2</sub> SO <sub>4</sub> ,<br>MgSO <sub>4</sub> ,<br>CaCl <sub>2</sub> ,<br>MgCl <sub>2</sub> | - | ~54,<br>~62,<br>~43,<br>~92,<br>~96,<br>~97  | - | (136) |
| PES          | -     | -   | -    | Polyamide<br>(Meta-<br>phenylene<br>diamine,<br>Trimesoyl<br>chloride,<br>Graphene oxide,<br>Chitosan) | - | 0.86  | - | NaCl                                                                                                                   | - | 88.58                                        | - | (137) |

|                                             |      |       |      |                                                                              |       |           |       |                                                                               |      |                            |      |       |
|---------------------------------------------|------|-------|------|------------------------------------------------------------------------------|-------|-----------|-------|-------------------------------------------------------------------------------|------|----------------------------|------|-------|
| Polydopamine coated zeolite anchored on PSF | 50   | -38   | -    | Polyamide (Piperazine, 1,3,5-benzenetriacyl chloride)                        | -     | 22.50     | -     | NaCl, MgCl <sub>2</sub> , MgSO <sub>4</sub> , Na <sub>2</sub> SO <sub>4</sub> | -    | 48.60, 91.30, 99.10, 99.50 | -    | (138) |
| Polyethylene                                | 33.4 | -1    | 0.27 | Polyamide (Piperazine, 1,3,5-benzenetriacyl chloride, Isopropyl alcohol)     | -     | 3.5-4.8   | -     | Na <sub>2</sub> SO <sub>4</sub> , MgCl <sub>2</sub>                           | -    | 95, 94.30                  | -    | (139) |
| PSF                                         | 6.74 | -3    | -    | Polyamide (Pyromellitic acid, Cyanuric chloride, Branched polyethyleneimine) | -     | 9.8-20.40 | -     | Na <sub>2</sub> SO <sub>4</sub>                                               | -    | 95.10                      | -    | (140) |
| NF270                                       | -    | -31.3 | -    | BaCl <sub>2</sub> and Na <sub>2</sub> SO <sub>4</sub> aqueous solution       | 14.38 | 16.13     | 12.17 | Na <sub>2</sub> SO <sub>4</sub>                                               | 94.7 | 97                         | 2.43 | (141) |
| Nylon membrane disc filters                 | -    | -     | -    | Polyamide (m-phenylene diamine, Trimesoyl chloride)                          | -     | 16        | -     | Na <sub>2</sub> SO <sub>4</sub> , NaCl                                        | -    | 92.5, 65                   | -    | (142) |
| PES                                         | 3.25 | -11.4 | -    | Polyamide                                                                    | -     | 1.25      | -     | MgCl <sub>2</sub>                                                             | -    | 99.70,                     | -    | (143) |

|                                                        |        |     |      |                                                                                       |      |      |        |                                                                                                 |                                              |                                     |                                           |       |
|--------------------------------------------------------|--------|-----|------|---------------------------------------------------------------------------------------|------|------|--------|-------------------------------------------------------------------------------------------------|----------------------------------------------|-------------------------------------|-------------------------------------------|-------|
|                                                        |        |     |      | (Branched polyethylenimine, 1,4-phenylene diisocyanate, Cyanuric chloride)            |      |      |        | MgSO <sub>4</sub> ,<br>CuCl <sub>2</sub> ,<br>NaCl,<br>LiCl,<br>Na <sub>2</sub> SO <sub>4</sub> | 99.1,<br>99.30,<br>98.90,<br>98.80,<br>98.80 |                                     |                                           |       |
| Sulfonic acid functionalized graphene oxide and PES    | 140.83 | -40 | 7.55 | Polyamide (m-phenylene diamine, Trimesoyl chloride)                                   | 0.68 | 3.09 | 354.41 | Cr(VI),<br>As(V),<br>Na <sub>2</sub> SO <sub>4</sub> ,<br>MgCl <sub>2</sub> ,<br>NaCl           | ~76,<br>~90,<br>~77,<br>~62,<br>~58          | ~89,<br>~99,<br>~79,<br>~72,<br>~68 | 17.11,<br>10,<br>2.60,<br>16.13,<br>17.24 | (144) |
| Poly(p-phenylene terephthamide)/ Poly(ethylene glycol) | -      | -38 | -    | Polyamide (Piperazine, 1,3,5-benzenetricarbonyl trichloride, UiO-66-NH <sub>2</sub> ) | -    | ~2.8 | -      | Na <sub>2</sub> SO <sub>4</sub> ,<br>MgSO <sub>4</sub> ,<br>MgCl <sub>2</sub> ,<br>NaCl         | -                                            | 96.30,<br>85.40,<br>53.20,<br>18.40 | -                                         | (145) |
| Polyacrylonitrile                                      | -      | -   | -    | Polyamide (M-phenylenediamine, trimesoylchloride)                                     | -    | 1    | -      | NaCl                                                                                            | -                                            | 98.6                                | -                                         | (146) |
| Polycarbonate TE                                       | -      | -   | -    | Polyamide (m-phenylenediamine, 1,3,5-benzenetricarbonyl trichloride)                  | -    | 1.1  | -      | NaCl                                                                                            | -                                            | 97                                  | -                                         | (147) |

|                                                               |      |      |      |                                                                                                                 |   |       |   |                                                                  |   |                          |   |       |
|---------------------------------------------------------------|------|------|------|-----------------------------------------------------------------------------------------------------------------|---|-------|---|------------------------------------------------------------------|---|--------------------------|---|-------|
| PES                                                           | -    | -12  | <0.5 | Polyamide<br>(piperazine,<br>1,3,5-<br>benzenetricarbo<br>nyl trichloride)                                      | - | 15.80 | - | Na <sub>2</sub> SO <sub>4</sub> ,<br>MgSO <sub>4</sub> ,<br>NaCl | - | 99.5,<br>99.30,<br>47.80 | - | (148) |
| Polyacrylonitrile-<br>PX,<br>XL-<br>poly(epoxyether)<br>(PEE) | -    | -    | -    | Polyamide<br>(N,N,N',N'-<br>tetramethyl-1,6-<br>hexanediamine,<br>Tetraphenoletha<br>ne tetraglycidyl<br>ether) | - | 0.5-3 | - | NaCl                                                             | - | 20-85                    | - | (149) |
| PSF                                                           | 5.3  | -45  | 0.5  | Polyamide<br>(Piperazine,<br>1,3,5-<br>benzenetricarbo<br>xylic trichloride,<br>7,7'-OH-<br>BINOL)              | - | 17.01 | - | Na <sub>2</sub> SO <sub>4</sub>                                  | - | 98                       | - | (150) |
| PSF                                                           | 64.7 | -    | -    | Polyamide<br>(Piperazine,<br>Trimesoyl<br>chloride,<br>m-<br>phenylenediami<br>ne)                              | - | 2.96  | - | NaCl                                                             | - | 99.40                    | - | (151) |
| PSF                                                           | -    | 18.2 | -    | Polyamide<br>(Piperazine,<br>Trimesoyl                                                                          | - | 12.62 | - | MgCl <sub>2</sub>                                                | - | 94.60                    | - | (152) |



|                                                              |        |     |      |                                                                                                                |       |        |        |                                                                                         |                             |                               |                                  |       |
|--------------------------------------------------------------|--------|-----|------|----------------------------------------------------------------------------------------------------------------|-------|--------|--------|-----------------------------------------------------------------------------------------|-----------------------------|-------------------------------|----------------------------------|-------|
|                                                              |        |     |      | chloride,<br>Branched<br>polyethyleneimi<br>ne)                                                                |       |        |        |                                                                                         |                             |                               |                                  |       |
| PES                                                          | 28.6   | -28 | 0.59 | Polyamide<br>(Piperazine,<br>Trimesoyl<br>chloride,<br>2-acrylamido-2-<br>methyl-1-<br>propanesulfonic<br>acid | -     | 30.5   | -      | Na <sub>2</sub> SO <sub>4</sub>                                                         | -                           | 99.70                         | -                                | (153) |
| Commercial<br>polyamide-based<br>reverse osmosis<br>membrane | 129.72 | -35 | -    | Diazotization<br>reagent reaction                                                                              | 14.20 | ~15.50 | 9.15   | NaCl                                                                                    | 96.50                       | ~98                           | 1.55                             | (154) |
| Flat-sheet<br>polyamide-based<br>reverse osmosis<br>membrane | -      | 5   | -    | Polyamide<br>(Cellulose<br>derivative<br>polyquaternium-<br>10, Polyvinyl<br>alcohol,<br>Glutaraldehyde)       | 6.03  | 4.32   | -28.36 | NaCl                                                                                    | 98.14                       | 98.58                         | 0.45                             | (155) |
| PES                                                          | -      | -28 | 0.38 | Polyamide<br>(Piperazine,<br>Trimesoyl<br>chloride)                                                            | ~8    | ~12    | 50     | Na <sub>2</sub> SO <sub>4</sub> ,<br>MgCl <sub>4</sub> ,<br>CaCl <sub>2</sub> ,<br>NaCl | ~98,<br>~97,<br>~95,<br>~45 | ~98,<br>~96.5,<br>~93,<br>~30 | 0,<br>-0.52,<br>-2.11,<br>-33.33 | (156) |
| Nanofibrous mat                                              | -      | -   | 180  | Polyamide                                                                                                      | -     | 25.50  | -      | Na <sub>2</sub> SO <sub>4</sub> ,                                                       | -                           | 97.40,                        | -                                | (157) |

|                         |                                                                             |                     |                                                    |                           |
|-------------------------|-----------------------------------------------------------------------------|---------------------|----------------------------------------------------|---------------------------|
| from sulfonated<br>PVDF | (Meta<br>phenylenediami<br>ne,<br>1,3,5-benzene<br>tricarboxyl<br>chloride) | L/m <sup>2</sup> .h | MgSO <sub>4</sub> ,<br>CaCl <sub>2</sub> ,<br>NaCl | 98.40,<br>97.40,<br>88.80 |
|-------------------------|-----------------------------------------------------------------------------|---------------------|----------------------------------------------------|---------------------------|

**Table S3.** Biomimetic membranes used for desalination and heavy metals removal in 2023-2024.

| Membrane matrix                                      | Biomimicry                       | Feature                        | Charge (mV) | Roughness (nm) | Pore size (nm) | Permeability (L/m <sup>2</sup> .h.bar) | Pollutant                                                 | Rejection (%) Support       | Ref.  |
|------------------------------------------------------|----------------------------------|--------------------------------|-------------|----------------|----------------|----------------------------------------|-----------------------------------------------------------|-----------------------------|-------|
| TFC RO<br>PAN-PEI/PAA/PA                             | Sharklet pattern                 | Biofouling reduction           | -           | -              | 25             | 1.47                                   | NaCl                                                      | 98.2                        | (158) |
| Polycarbonate tracketched membrane (PCTE)-Peptide-GO | Artificial ion channels          | Selective ion transport        | -           | -              | 30-40          | -                                      | NaCl,<br>KCl,<br>MgCl <sub>2</sub> ,<br>CaCl <sub>2</sub> | ~48,<br>~45,<br>~37,<br>~47 | (159) |
| PAN-Peptoid added PA                                 | Biomimetic antimicrobial peptoid | Antimicrobial & antibiofouling | 12.5        | 132.5 μm       | -              | 2.21                                   | NaCl                                                      | 99.4                        | (160) |

|                                                                                                         |                                 |                                                                           |        |      |      |                          |                                                                                                                                                                          |                                            |       |
|---------------------------------------------------------------------------------------------------------|---------------------------------|---------------------------------------------------------------------------|--------|------|------|--------------------------|--------------------------------------------------------------------------------------------------------------------------------------------------------------------------|--------------------------------------------|-------|
| PSF-PA-SWCNT-liposomes                                                                                  | Artificial water channel        | Enhanced water permeability                                               | -32.23 | 124  | -    | 43.2 L/m <sup>2</sup> .h | NaCl                                                                                                                                                                     | 97.6                                       | (161) |
| Water channel-based biomimetic membrane (Nanovesicle-containing m-phenylenediamine, Trimesoyl chloride) | Biomimetic water channels       | Water permeability enhancement and breaking the permselectivity trade-off | -65    | -    | -    | 8.2                      | NaCl                                                                                                                                                                     | 96.4                                       | (162) |
| CTA-RO                                                                                                  | Pore mechanism of frozen tofu   | Long Lifetime                                                             | -67    | 9.92 | ~18  | 17.2                     | NaCl                                                                                                                                                                     | 89.9                                       | (163) |
| PA-BNP-Ag                                                                                               | Incorporation of biomimetic NPs | High permselectivity & Antifouling/bacterial property                     | -28    | 57.5 | 0.27 | 4.2                      | NaCl                                                                                                                                                                     | 98.1                                       | (11)  |
| Artificial water channel-polyamide                                                                      | Artificial water channel        | Enhanced water-salt permselectivity                                       | -35    | -    | 0.26 | 3.9                      | Cl <sup>-</sup> , NO <sub>3</sub> <sup>-</sup> , F <sup>-</sup> , SO <sub>4</sub> <sup>2-</sup> , Na <sup>+</sup> , K <sup>+</sup> , Ca <sup>2+</sup> , Mg <sup>2+</sup> | 80-96                                      | (164) |
| Lecithin incorporated PESH-PA NF                                                                        | Lecithin incorporation          | Enhanced permselectivity for dye/salt separation                          | -105   | 24.1 | 0.85 | 48.3                     | NaCl                                                                                                                                                                     | 17.5% for NaCl, 7.2% for MgCl <sub>2</sub> | (165) |
| Polydopamine/cystamine coated PSF-PA RO                                                                 | Redox-responsive                | Anti-fouling                                                              | -      | 37.8 | -    | 0.54                     | NaCl                                                                                                                                                                     | 99.11                                      | (166) |

| coatings                                                    |                                                                                                      |                                                   |     |      |    |      |                           |               |       |
|-------------------------------------------------------------|------------------------------------------------------------------------------------------------------|---------------------------------------------------|-----|------|----|------|---------------------------|---------------|-------|
| Catechol /tetraethylenepentamine/Ag coated commercial ESPA1 | Co-deposition of catechol /tetraethylenepentamine                                                    | Anti-biofouling                                   | -32 | 74.5 | -  | ~73p | NaCl                      | ~97           | (167) |
| GSNA                                                        | Guanidinefunctionalized sericin/nanocellulose aerogel (GSNA) with a biomimetic skeletal architecture | Hybrid water disinfection and heavy metal removal | -40 | -    | 47 | 2900 | Cu (II), Co (II), Ni (II) | ~85, ~75, ~78 | (168) |
| PLA fibers-polydopamine assisted PEI grafting               | Green modification method                                                                            | Biodegradability                                  | 15  | -    | -  | -    | Cr (VI)                   | 64.79         | (169) |

**Table S4.** Forward osmosis membranes used for desalination and heavy metals removal in 2023-2024.

| FO Membrane Material                        | Draw Solute                                                    | Osmolality (mOsm/kg) |     | Feed Solution | Mode  | DI Water Flux (LMH) | Solution Water Flux (LMH)/Specific Salt Flux (g/L) | Reverse Salt Flux (gMH) | Ref.  |
|---------------------------------------------|----------------------------------------------------------------|----------------------|-----|---------------|-------|---------------------|----------------------------------------------------|-------------------------|-------|
| Hydration Technologies Inc. TFC FO Membrane | Tributyl-4-vinylbenzylphosphonium alkanesulfonate ionic liquid | 2 wt.%               | 80  | 2000 ppm NaCl | AL-DS | 11.4                | 8.01                                               | 6                       | (170) |
|                                             |                                                                | 4                    | 170 |               |       |                     |                                                    |                         |       |
|                                             |                                                                | 6                    | 230 |               |       |                     |                                                    |                         |       |
|                                             |                                                                | 8                    | 310 |               |       |                     |                                                    |                         |       |
| Porifera TFC FO Membrane                    | Poly(amidoamine) dendrimer                                     | 10 g/L               | 344 | DI            | AL-DS | 12.9                | --                                                 | --                      | (171) |

|                                                                   |                                  |           |        |                      |  |       |              |      |        |
|-------------------------------------------------------------------|----------------------------------|-----------|--------|----------------------|--|-------|--------------|------|--------|
|                                                                   | coated magnetic NPs (PAMAM-MNPs) | 20        | 561    |                      |  |       |              |      |        |
|                                                                   |                                  | 30        | 636    |                      |  |       |              |      |        |
|                                                                   |                                  | 40        | 721    |                      |  |       |              |      |        |
| Support-free assembled molecular layer-by-layer (SF-mLbL) HPAN FO |                                  |           |        |                      |  | AL-DS | ~ 49         | 0.17 | ~ 7    |
|                                                                   |                                  |           |        |                      |  | AL-FS | 43.52 ± 0.89 | 0.17 | ~ 6.2  |
| IP-PA                                                             | 0.5,1,1.5 & 2 M NaCl             | --        | DI     | 0.5,1,1.5 & 2 M NaCl |  | AL-DS | ~ 16         | 0.78 | ~ 12   |
|                                                                   |                                  |           |        |                      |  | AL-FS | 10.34 ± 0.48 | 0.75 | ~ 7.7  |
| Commercial Cellulose Triacetate                                   |                                  |           |        |                      |  | AL-DS | ~ 14         | 0.85 | ~ 11.5 |
|                                                                   |                                  |           |        |                      |  | AL-FS | 7.41 ± 0.18  | 0.82 | ~ 6    |
| PES-PA Aquaporin TFC FO (A/S, Denmark)                            | Zinc sulfate                     | 83700 ppm | 12 bar | 0.5, 1 & 1.5 M NaCl  |  | AL-DS | 6.5          | 6.5  | 4      |
|                                                                   |                                  | 167400    | 21.6   |                      |  | AL-FS |              | 11.5 | 4.5    |
|                                                                   |                                  | 251100    | 30     |                      |  | AL-DS | 8.2          | 8.1  | 4.6    |
|                                                                   |                                  |           |        |                      |  | AL-FS |              | 14   | 5      |
|                                                                   |                                  |           |        |                      |  | AL-DS | 8.8          | 8.8  | 5.8    |
|                                                                   |                                  |           |        |                      |  | AL-FS |              | 21.5 | 6.6    |
| In-house made TFC-HF FO with a PA selective layer                 | PEO2-PPO16-PEO2 (L31)            | 30        | 20     | NaCl 1%,             |  |       |              | 5    |        |
|                                                                   |                                  | 50        | 22     |                      |  |       |              |      |        |
|                                                                   |                                  | 65        | 23     | NaCl 3.5%,           |  |       |              | 3    |        |
|                                                                   |                                  | 75        | 35     |                      |  |       |              |      |        |
|                                                                   | PEO11-PPO16-PEO11 (L35)          | 30        | 28     | NaCl 10%             |  | AL-DS | 11           |      | -      |
|                                                                   |                                  | 40        | 35     |                      |  |       |              | 2    |        |
|                                                                   |                                  | 65        | 100    |                      |  |       |              |      |        |
|                                                                   |                                  | 75        | 130    |                      |  |       |              |      |        |
|                                                                   | PEO2-PPO30-PEO2 (L61)            | 65 wt.%   | 10 bar | SWRO brine           |  |       |              | 2.5  |        |
|                                                                   | PEO13-PPO30-PEO13 (L64)          | --        | --     |                      |  |       |              |      |        |
| Chitosan Nanofibers/PA                                            | NaCl                             | 0.5       | -      | DI water             |  | AL-DS | -            | 95   | ~ 7    |

(172)

(173)

(174)

(175)

|                                                                         |                      |       |       |                 |       |        |          |         |       |
|-------------------------------------------------------------------------|----------------------|-------|-------|-----------------|-------|--------|----------|---------|-------|
|                                                                         |                      | mol/L |       |                 |       |        |          |         |       |
|                                                                         |                      | 1     |       |                 |       |        | 107.53   | ~ 28    |       |
|                                                                         |                      | 1.5   |       |                 |       |        | 125      | ~ 37    |       |
|                                                                         |                      | 2     |       |                 |       |        | 131.13   | ~ 42    |       |
| Ag@NH <sub>2</sub> -UiO-66/PAES-COOH                                    | NaCl                 | 0.4 M | -     | DI water        | -     | -      | 5.5      | 2.6     |       |
|                                                                         |                      | 0.6   |       |                 |       |        | 8        | ~ 3.75  |       |
|                                                                         |                      | 0.8   |       |                 |       |        | 11       | ~ 6.2   |       |
| Ag@NH <sub>2</sub> -UiO-66/PAES-COOH                                    | NaCl                 | 1     | -     | DI water        | -     | -      | 13.78    | ~ 7     | (176) |
|                                                                         |                      | 1.2   |       |                 |       |        | 15.8     | ~ 7.9   |       |
|                                                                         |                      | 1.4   |       |                 |       |        | 19       | ~ 9.2   |       |
|                                                                         |                      |       |       |                 |       | TFC-0  | 11.41    | 0.265   | 2.92  |
|                                                                         |                      |       |       |                 | AL-DS | TFC-10 | 10.7     | 0.07    | 0.77  |
|                                                                         |                      |       |       |                 |       | TFC-20 | 9.22     | 0.065   | 0.54  |
| Perylene diimide/PES/PA                                                 | NaCl                 | 1 M   | -     | DI water        |       | TFC-30 | 10.05    | 0.05    | 0.49  |
|                                                                         |                      |       |       |                 |       | TFC-0  | 7.6      | 0.190   | 1.5   |
|                                                                         |                      |       |       |                 | AL-FS | TFC-10 | 7.1      | 0.065   | 0.4   |
|                                                                         |                      |       |       |                 |       | TFC-20 | 7.1      | 0.05    | 0.35  |
|                                                                         |                      |       |       |                 |       | TFC-30 | 6.8      | 0.055   | 0.4   |
| FO-TFC (Hydration Technology Innovations – HTI)                         | Ammonium Bicarbonate | 3 M   | --    | DI Water        | AL-FS | 15.8   | --       | 95852   | (178) |
| CTA & CA FO                                                             | NaCl                 | 1 M   | --    | DI Water        | AL-DS | --     | 1464.21- | 164.79- | (179) |
|                                                                         |                      |       |       |                 |       |        | 1627.12  | 870.44  |       |
| CF042A-FO, Sterlitech Corp., Kent, Auburn, WA, USA                      | CaCl <sub>2</sub>    | 1 M   |       |                 |       |        |          | 1.2     |       |
|                                                                         |                      | 2     | -     | Sodium alginate | AL-DS | -      | -        | 0.8     | (180) |
|                                                                         |                      | 3     |       |                 |       |        |          | 0.55    |       |
| MIL-53(Fe)@ $\gamma$ -Al <sub>2</sub> O <sub>3</sub> /cellulose acetate | NaCl                 | 1 M   | --    | DI              | --    | --     | 37.1     | 1.78    | (181) |
| Cellulose triacetate (CTA) FO                                           | NaCl                 | --    | 128.0 | Raffinate       | AL-DS | -      | 2.7      | -       | (182) |

|                                                             |                                        |                           |          |                               |                                                            |       |       |      |       |       |
|-------------------------------------------------------------|----------------------------------------|---------------------------|----------|-------------------------------|------------------------------------------------------------|-------|-------|------|-------|-------|
| (Fluid Technology Solutions Inc., Albany, OR, USA, FTS H2O) | MgCl <sub>2</sub> ·6H <sub>2</sub> O   | --                        | 54.4 bar | Mine Water                    | AL-FS                                                      | -     | 5.3   | -    |       |       |
| PSF/PA TFC                                                  |                                        |                           |          |                               |                                                            |       | 9.1   | 0.02 |       |       |
| PSA/PA/CNC TFN-1                                            | NaCl                                   | 2 M                       |          | 6000 ppm of greasy wastewater | AL-DS                                                      | -     | 18    | 0.28 | (183) |       |
| PSA/PA/CNC TFN-5                                            |                                        |                           |          |                               |                                                            |       | 31    | 0.57 |       |       |
| PSA/PA/CNC TFN-7                                            |                                        |                           |          |                               |                                                            |       | 38    | 0.88 |       |       |
|                                                             |                                        | 0.5 M                     |          |                               |                                                            |       | 5.1   | 1.5  |       |       |
| CTA FO (FTSH2O, Fluid Tech. Solutions, Albany, OR, USA)     | NaCl                                   | 1                         |          | Synthetic salt/Dye effluent   | AL-FS                                                      | --    | 9.5   | 2.9  | (184) |       |
|                                                             |                                        | 2                         |          |                               |                                                            |       | 11    | 3.6  |       |       |
|                                                             |                                        | 3                         |          |                               |                                                            |       | 14.5  | 4.4  |       |       |
|                                                             | RO brine                               | --                        | --       |                               |                                                            |       | --    |      |       |       |
| Porous Hydrophilic Polymer/PA (PFO-100)                     | NH <sub>4</sub> <sup>+</sup>           |                           |          | 2500 ppm                      |                                                            |       |       | 0.04 | (185) |       |
|                                                             | NO <sub>3</sub> <sup>-</sup>           |                           |          | Synthetic                     |                                                            |       |       | 1.22 |       |       |
|                                                             | PO <sub>4</sub> <sup>-</sup>           | -                         |          | brackish ground               | -                                                          | -     | -     | 1.21 |       |       |
|                                                             | K <sup>+</sup>                         |                           |          | water                         |                                                            |       |       | 2.09 |       |       |
| TFC FO, Hydration Technologies Inc. (Albany, Oregon, USA)   | Thermosensitive magnetic ionic liquids | [BIM][FeCl <sub>4</sub> ] | 5 wt.%   | --                            | Distilled water & simulated brackish water (2000 ppm NaCl) | AL-FS | 17.5  | --   | 52    | (186) |
|                                                             |                                        |                           |          |                               |                                                            | AL-DS | 20.5  | --   | 62.5  |       |
|                                                             |                                        |                           | 10       | 1707                          |                                                            | AL-FS | 21    | --   | 76    |       |
|                                                             |                                        |                           |          |                               |                                                            | AL-DS | 22    | --   | 76    |       |
|                                                             |                                        |                           | 15       | --                            |                                                            | AL-FS | 21.66 | --   | 87.5  |       |
|                                                             |                                        |                           |          |                               |                                                            | AL-DS | 26    | --   | 93.6  |       |
|                                                             | 20                                     | --                        | AL-FS    | 22.16                         | 15.1                                                       | 92.29 |       |      |       |       |
|                                                             |                                        |                           | AL-DS    | 27.61                         | --                                                         | 95.63 |       |      |       |       |
|                                                             | Thermosensitive magnetic ionic liquids | [BPY][FeCl <sub>4</sub> ] | 5        | --                            | Distilled water & simulated brackish water (2000 ppm NaCl) | AL-FS | 17    | --   | 49    |       |
|                                                             |                                        |                           |          |                               |                                                            | AL-DS | 18.2  | --   | 60    |       |
|                                                             |                                        |                           | 10       | 1659                          |                                                            | AL-FS | 19.4  | --   | 62.5  |       |
|                                                             |                                        |                           |          |                               |                                                            | AL-DS | 21    | --   | 49    |       |

|                                                            |                 |                           |     |      |          |       |       |      |                                  |       |
|------------------------------------------------------------|-----------------|---------------------------|-----|------|----------|-------|-------|------|----------------------------------|-------|
|                                                            |                 |                           | 15  | 3850 |          | AL-FS | 20.43 | --   | 75                               |       |
|                                                            |                 |                           |     |      |          | AL-DS | 23    | --   | 87.5                             |       |
|                                                            |                 |                           | 20  | --   |          | AL-FS | 21.43 | --   | 87.33                            |       |
|                                                            |                 |                           |     |      |          | AL-DS | 24.91 | --   | 92.00                            |       |
|                                                            |                 |                           | 5   | 675  |          | AL-FS | 11    | --   | 37.5                             |       |
|                                                            |                 |                           |     |      |          | AL-DS | 14.7  | --   | 39                               |       |
|                                                            |                 |                           | 10  | 1610 |          | AL-FS | 14.5  | --   | 51                               |       |
|                                                            |                 | [BMP][FeCl <sub>4</sub> ] |     |      |          | AL-DS | 14.9  | --   | 62                               |       |
|                                                            |                 |                           | 15  | 3032 |          | AL-FS | 14.7  | --   | 60                               |       |
|                                                            |                 |                           |     |      |          | AL-DS | 15    | --   | 77                               |       |
|                                                            |                 |                           | 20  | --   |          | AL-FS | 15.74 | --   | 76.33                            |       |
|                                                            |                 |                           |     |      |          | AL-DS | 20.07 | --   | 89.67                            |       |
| RGO                                                        | GM1             |                           |     |      |          |       | 21    |      | 10.8                             |       |
| Geopolymer/TiO <sub>2</sub>                                | GM2             | NaCl                      | --  |      | DI water | --    | 10.5  | -    | 8.2                              | (187) |
| FO                                                         | GM3             |                           |     |      |          |       | 6     |      | 4                                |       |
|                                                            | PIP-TMC (PIP)   |                           |     |      |          |       |       | 9.29 | 4.21                             |       |
|                                                            | PIP-ST (ST)     | NaCl                      | --  |      | DI water | --    | --    | 22.6 | 2.94                             |       |
| PSF/PA                                                     | PIP-ABSA (ABSA) |                           |     |      |          |       |       | 18   | 3.1                              | (188) |
|                                                            | PIP-AESA (AESA) |                           |     |      |          |       |       | 16   | 3.6                              |       |
| Cellulose triacetate (CTA) FO, Hydration Tech. Innovations |                 | NaCl                      | 1 M |      | DI       | -     | -     | -    | 60.0 ± 6.7 mmol/m <sup>2</sup> h | (189) |



|                     |      |                                  |          |       |      |      |             |
|---------------------|------|----------------------------------|----------|-------|------|------|-------------|
| (HTI, Albany, USA). |      |                                  |          | SA    |      |      | 75          |
|                     |      |                                  |          | HA    |      |      | 110         |
|                     |      |                                  |          | DI    |      |      | 33.0 ± 5.6  |
|                     |      | CaCl <sub>2</sub>                |          | SA    |      |      | 5.8 ± 1.6   |
|                     |      |                                  |          | HA    |      |      | 7.1 ± 1.9   |
|                     |      |                                  |          | DI    |      |      | 94.6 ± 18.3 |
|                     |      |                                  |          | SA    |      |      | 129.2 ±     |
|                     |      | NH <sub>4</sub> Cl               |          | HA    |      |      | 12.8        |
|                     |      |                                  |          | DI    |      |      | 220.6 ±     |
|                     |      |                                  |          | SA    |      |      | 26.1        |
|                     |      | NaHCO <sub>3</sub>               |          | DI    |      |      | 36.9 ± 9.6  |
|                     |      |                                  |          | SA    |      |      | 26.2 ± 5.7  |
|                     |      |                                  |          | HA    |      |      | 41.2 ± 7.4  |
|                     |      |                                  |          | DI    |      |      | 6.6 ± 4.0   |
|                     |      | NaH <sub>2</sub> PO <sub>4</sub> |          | SA    |      |      | 15          |
|                     |      |                                  |          | HA    |      |      | 25          |
| PES TFC             |      |                                  |          | AL-DS | 13.1 | 0.3  | ~ 5         |
|                     |      |                                  |          | AI-FS | 9.2  | 0.5  | ~ 4.5       |
|                     | NaCl | 1 M                              | DI Water | AL-DS | 52   | 0.30 | ~ 15        |
| TFNi-0              |      |                                  |          | AI-FS | 25.5 | 0.35 | ~ 11        |
|                     |      |                                  |          | AL-DS | 47.5 | 0.4  | ~ 16        |
| TFNi-4              |      |                                  |          | AI-FS | 24   | 0.35 | ~ 11        |
|                     |      |                                  |          | AL-DS | 48   | 0.25 | ~ 14        |
| TFNi-8              |      |                                  |          | AI-FS | 23.5 | 0.38 | ~ 11        |
|                     | NaCl | 1 M                              | DI Water | AL-DS | 56.6 | 0.4  | ~ 20        |
| TFNi-12             |      |                                  |          | AI-FS | 25.8 | 0.4  | ~ 12        |
|                     |      |                                  |          | AL-DS | 43.5 | 0.66 | ~ 29        |
| TFNi-16             |      |                                  |          | AI-FS | 22.8 | 0.63 | ~ 14        |

(190)

|                          |      |       |          |       |       |                              |        |       |
|--------------------------|------|-------|----------|-------|-------|------------------------------|--------|-------|
| Toray                    |      |       |          | AL-DS | 37    | 0.25                         | ~ 14   |       |
|                          |      |       |          | Al-FS | 24.3  | 0.3                          | ~ 8    |       |
| HTI                      |      |       |          | AL-DS | 45    | 1.2                          | ~ 49.5 |       |
|                          |      |       |          | Al-FS | 22    | 1.1                          | ~ 24   |       |
| MWCNT10-PVA/PA           |      | 1 M   |          | FO    |       | ~ 14                         | ~ 3    |       |
| MWCNT20-PVA/PA           |      | 1 M   |          | FO    |       | ~ 10.3                       | ~ 2.5  |       |
| MWCNT30-PVA/PA           |      | 1 M   |          | FO    |       | ~ 8.5                        | ~ 2.7  |       |
| pCNT5-PVA/PA             |      | 1 M   |          | FO    |       | ~ 21                         | ~ 4    |       |
| pCNT10-PVA/PA            |      | 1 M   |          | FO    |       | ~ 15.7                       | ~ 2.5  |       |
| pCNT20-PVA/PA            |      | 1 M   |          | FO    |       | ~ 13                         | ~ 2.3  |       |
| pCNT30-PVA/PA            |      | 1 M   |          | FO    |       | ~ 10.5                       | ~ 2.2  |       |
| PVA1pCNT3-PA             |      | 1 M   |          | FO    | -     | ~ 22.5                       | ~ 6.75 |       |
| PVA1pCNT5-PA             | NaCl | 1 M   | DI water | FO    |       | ~ 21.5                       | ~ 7.3  | (191) |
| PVA1pCNT10-PA            |      | 1 M   |          | FO    |       | ~ 16                         | ~ 4    |       |
| PVA0.25pCNT3-PA          |      | 0.5 M |          | FO    |       | 22.57 (0.45)                 | 10.12  |       |
|                          |      | 1 M   |          | PRO   |       | 30.72 (0.46)                 | 14.22  |       |
|                          |      |       |          | FO    |       | 30.16 (0.3)                  | 9.34   |       |
| PVA0.25pCNT3-PA          |      | 1 M   |          | PRO   |       | 42.85 (0.39)                 | 16.72  |       |
|                          |      | 2 M   |          | FO    |       | 55.53 (0.46)                 | 25.37  |       |
|                          |      |       |          | PRO   |       | 81.48 (0.46)                 | 37.84  |       |
| PVA0.5pCNT3-PA           |      | 1 M   |          | FO    |       | ~ 27                         | ~ 6.5  |       |
| PVA2pCNT3-PA             |      |       |          | FO    |       | 17.47                        | ~ 7.2  |       |
| PSF/PA-Sulfonated GO TFC |      |       |          |       | 7.29  | Specific Salt<br>Flux= 0.036 | 0.27   |       |
| PSF/PA-Sulfonated GO TFN |      |       |          |       |       |                              |        |       |
| TFC-GO1                  | NaCl | 2 M   | DI water | -     | 22.84 | --                           | --     | (192) |
| TFC-SGO1                 |      |       |          |       | 25.28 | 0.012                        | 0.24   |       |
| TFC-SGO2                 |      |       |          |       | 32.53 | 0.0075                       | 0.19   |       |

|                               |        |          |       |            |       |       |       |       |        |      |      |
|-------------------------------|--------|----------|-------|------------|-------|-------|-------|-------|--------|------|------|
| TFC-SGO3                      |        |          |       |            |       | 38.12 | 0.004 | 0.17  |        |      |      |
| Cu@FO-0.0                     |        |          |       |            |       |       | 26    | --    |        |      |      |
| Cu@FO-0.1                     |        |          |       |            |       |       | ~ 37  | --    |        |      |      |
| Cu@FO-0.2                     |        | NaCl     | 2 M   | DI water   | -     | -     | ~ 50  | --    | (193)  |      |      |
| Cu@FO-0.3                     |        |          |       |            |       |       | ~ 58  | --    |        |      |      |
| Cu@FO-0.4                     |        |          |       |            |       |       | ~ 58  | --    |        |      |      |
| Cu@FO-0.5                     |        |          |       |            |       |       | 58.13 | 0.57  |        |      |      |
| GO/pDA                        |        |          |       |            |       |       | 33    | 6.07  |        |      |      |
| PEI:rGO/pDA                   |        | Dextrose | 0.5 M | 0.1 M NaCl | AL-FS | -     | 25.5  | 0.91  | (193)  |      |      |
| PEI:rGO                       |        |          |       |            |       |       | 22.3  | 1.61  |        |      |      |
| CTA-FO                        |        |          |       |            |       |       | 7.03  | 7.59  |        |      |      |
| PES/SA<br>@Mxene/PA<br>TFN FO | PES-PA |          | 0.5 M | DI Water   |       |       | AL-FS | --    | 0.26   | 2.2  |      |
|                               |        |          |       |            |       |       | AL-DS | --    | 0.36   | 6    |      |
|                               |        |          |       |            |       |       | AL-FS | 13.0  | 0.34   | 4.4  |      |
|                               |        |          |       |            |       |       | AL-DS | 23.0  | ~ 0.49 | 11.5 |      |
|                               |        |          |       |            |       |       | AL-FS | 21.6  | 0.4    | 8.5  |      |
|                               |        |          |       |            |       |       | AL-DS | 40.8  | 0.58   | 23.5 |      |
| PES/SA<br>@Mxene/PA<br>TFN FO | SCMP-1 | NaCl     | 0.5 M | DI Water   |       |       | AL-FS | --    | --     | --   |      |
|                               |        |          |       |            |       |       | AL-DS | --    | --     | --   |      |
|                               |        |          |       |            |       |       | AL-FS | 17.0  | --     | 5.7  |      |
|                               |        |          |       |            |       |       | AL-DS | 30.0  | --     | 12.5 |      |
|                               |        |          |       |            |       |       | AL-FS | --    | --     | --   |      |
|                               |        |          |       |            |       |       | AL-DS | --    | --     | --   |      |
|                               | SCMP-2 | NaCl     | 0.5 M | DI Water   |       |       |       | AL-FS | --     | --   | --   |
|                               |        |          |       |            |       |       |       | AL-DS | --     | --   | --   |
|                               |        |          |       |            |       |       |       | AL-FS | 19.2   | --   | 4.2  |
|                               |        |          |       |            |       |       |       | AL-DS | 33.5   | --   | 13.0 |
|                               |        |          |       |            |       |       |       | AL-FS | --     | --   | --   |
|                               |        |          |       |            |       |       |       | AL-DS | --     | --   | --   |

|                              |        |      |       |          |       |      |        |      |       |
|------------------------------|--------|------|-------|----------|-------|------|--------|------|-------|
|                              |        |      |       |          | AL-DS | --   | --     | --   |       |
|                              |        |      | 0.5 M |          | AL-FS | --   | --     | --   |       |
|                              |        |      |       |          | AL-DS | --   | --     | --   |       |
|                              | SCMP-3 |      | 1 M   |          | AL-FS | 25.5 | --     | 4.3  |       |
|                              |        |      |       |          | AL-DS | 40.5 | --     | 10.4 |       |
|                              |        |      | 2 M   |          | AL-FS | --   | --     | --   |       |
|                              |        |      |       |          | AL-DS | --   | --     | --   |       |
|                              | SCMP-4 |      | 0.5 M |          | AL-FS | --   | 0.16   | 2.5  |       |
|                              |        |      |       |          | AL-DS | --   | 0.19   | 5.0  |       |
|                              |        |      | 1 M   |          | AL-FS | 30.4 | ~ 0.17 | 5.2  |       |
|                              |        |      |       |          | AL-DS | 45.6 | ~ 0.2  | 9.0  |       |
|                              |        |      | 2 M   |          | AL-FS | 45.4 | 0.19   | 8.8  |       |
|                              |        |      |       |          | AL-DS | 66.6 | 0.24   | 16.0 |       |
| PES/SA                       |        |      | 0.5 M | DI Water | AL-FS | --   | --     | --   |       |
| @Mxene/PA                    |        | NaCl |       |          | AL-DS | --   | --     | --   | (194) |
| TFN FO                       | SCMP-5 |      | 1 M   |          | AL-FS | 30.2 | --     | 5.9  |       |
|                              |        |      |       |          | AL-DS | 44.0 | --     | 8.5  |       |
|                              |        |      | 2 M   |          | AL-FS | --   | --     | --   |       |
|                              |        |      |       |          | AL-DS | --   | --     | --   |       |
| TFC-FO                       |        |      |       |          |       | 6    | 0.55   | 3.6  |       |
| PTFE@TFC                     |        |      |       |          |       | 5.5  | 0.66   | 3.7  |       |
| PDA@TFC                      |        | NaCl | 1 M   | DI Water | AL-DS | 7    | 0.35   | 2.5  | (195) |
| A-TiO <sub>2</sub> /PDA@TFC  |        |      |       |          |       | 10.5 | 0.8    | 0.8  |       |
| A-TiO <sub>2</sub> /PTFE@TFC |        |      |       |          |       | 9.5  | 0.8    | 0.7  |       |
| PES (16 wt. %) - PA          | M4     |      |       |          |       | 6.02 |        | 2.85 |       |
|                              |        | NaCl | 1 M   | DI Water | AL-FS |      | -      |      | (196) |
| PES (17 wt. %) - PA          | M5     |      |       |          |       | 5.74 |        | 2.82 |       |

|                                                      |     |      |     |          |       |       |      |       |
|------------------------------------------------------|-----|------|-----|----------|-------|-------|------|-------|
| PES (18 wt. %) -<br>PA                               | M6  |      |     |          |       | 4.71  | 2.75 |       |
| PES (16 wt. % -<br>MAX Phase<br>0.025 wt. %) –<br>PA | M11 |      |     |          |       | 7.57  | 0.88 |       |
| PES (16 wt. % -<br>MAX Phase<br>0.05 wt. %) –<br>PA  | M12 |      |     |          |       | 9.47  | 1.48 |       |
| PES (16 wt. % -<br>MAX Phase<br>0.075 wt. %) –<br>PA | M13 |      |     |          |       | 12.82 | 2.09 |       |
| PES (16 wt. % -<br>MAX Phase 0.1<br>wt. %) – PA      | M14 |      |     |          |       | 14.17 | 3.6  |       |
| PES –PA (MPD<br>2%, MAX Phase<br>0.025)              | M15 |      |     |          |       | 6.83  | 2.49 |       |
| PES –PA (MPD<br>2%, MAX Phase<br>0.05)               | M16 | NaCl | 1 M | DI Water | AL-FS | 8.62  | 4.86 | (196) |
| PES –PA (MPD<br>2%, MAX Phase<br>0.075)              | M17 |      |     |          |       | 9.47  | 5.09 |       |
| PES –PA (MPD<br>2%, MAX Phase                        | M18 |      |     |          |       | 12    | 5.77 |       |

|                                              |          |      |     |          |       |            |        |             |
|----------------------------------------------|----------|------|-----|----------|-------|------------|--------|-------------|
| 0.1)                                         |          |      |     |          |       |            |        |             |
| PES-PA (TMC                                  |          |      |     |          |       |            |        |             |
| 15%, MAX                                     | M19      |      |     |          |       | 6.63       |        | 1.41        |
| Phase 0.025)                                 |          |      |     |          |       |            |        |             |
| PES-PA (TMC                                  |          |      |     |          |       |            |        |             |
| 15%, MAX                                     | M20      |      |     |          |       | 8.42       |        | 3.63        |
| Phase 0.05)                                  |          |      |     |          |       |            |        |             |
| PES-PA (TMC                                  |          |      |     |          |       |            |        |             |
| 15%, MAX                                     | M21      |      |     |          |       | 8.84       |        | 4.14        |
| Phase 0.075)                                 |          |      |     |          |       |            |        |             |
| PES-PA (TMC                                  |          |      |     |          |       |            |        |             |
| 15%, MAX                                     | M22      |      |     |          |       | 10.09      |        | 5.97        |
| Phase 0.1)                                   |          |      |     |          |       |            |        |             |
|                                              | PMIA 10% |      |     |          |       | 7.1        |        | 0.117       |
| PMIA-PA                                      | PMIA 11% | NaCl | 1 M | DI Water | AL-FS | 7          | -      | 0.115       |
|                                              | PMIA 12% |      |     |          |       | 5.4        |        | 0.1         |
|                                              | PMIA 13% |      |     |          |       | 5.25       |        | 0.97        |
| PMIA-PA                                      | PMIA 14% |      |     |          |       | 5          |        | 0.95        |
|                                              | PMIA 15% |      |     |          |       | 4.9        | -      | 0.9         |
| T <sub>1</sub> FO (Toray Chemical Korea Co.) |          | NaCl | 1 M | DI Water | AL-FS | 9.65       | 0.0215 | 0.208       |
| T <sub>2</sub> FO (FTS H <sub>2</sub> O Co.) |          |      |     |          |       | 6.71       | 0.0146 | 0.098       |
| TFC                                          |          |      |     |          |       | 12.5±0.5   |        | 2.56 ± 0.08 |
| PSF-PA-MoS <sub>2</sub> (0.01) TFN           |          |      |     |          |       | ~ 14       |        | 3.2         |
| PSF-PA-MoS <sub>2</sub> (0.02) TFN           |          |      |     |          |       | 14.3 ± 1.2 |        | 3.5         |
| PSF-PA-MoS <sub>2</sub> (0.05) TFN           |          | NaCl | 2 M | DI Water | AL-FS | 8.5        | -      | 6.5         |
| PSF-PA-MoS <sub>2</sub> (0.1) TFN            |          |      |     |          |       | 4.2        |        | 16          |
| PSF-PA-MoS <sub>2</sub> -Ag (0.01) TFN       |          |      |     |          |       | ~ 14.2     |        | 2.56 ± 0.08 |

(197)

(198)

|                                          |  |  |  |  |                          |              |               |             |
|------------------------------------------|--|--|--|--|--------------------------|--------------|---------------|-------------|
| PSF-PA-MoS <sub>2</sub> -Ag (0.02) TFN   |  |  |  |  | 16.9 ± 0.6               | 3            |               |             |
| PSF-PA-MoS <sub>2</sub> -Ag (0.05) TFN   |  |  |  |  | 14.3                     | 3.7          |               |             |
| PSF-PA-MoS <sub>2</sub> -Ag (0.1) TFN    |  |  |  |  | 7.5                      | 13.4         |               |             |
| PVDF-PA TFC                              |  |  |  |  | AL-FS                    | 27.8         | 0.56          | 15.5        |
| TFC/CNC                                  |  |  |  |  | AL-FS                    | 40.7         | 0.36          | 14.5        |
| TFC/BA-CNC                               |  |  |  |  | AL-FS                    | 46.0         | 0.22          | 9.9         |
| TFC/APTES-CNC                            |  |  |  |  | AL-DS                    | 43.1         | 0.3           | 13          |
| LTFC-0.25                                |  |  |  |  | AL-FS                    | ~ 42.5       | ~ 0.15        | 6.25        |
| LTFC-0.25                                |  |  |  |  | AL-DS                    | ~ 47.5       | ~ 0.16        | 7.4         |
| LTFC-0.5                                 |  |  |  |  | AL-FS                    | 56.60 ± 2.99 | ~ 0.09        | ~ 5.6       |
| LTFC-0.5                                 |  |  |  |  | AL-DS                    | 61.33 ± 2.85 | 0.087 ± 0.004 | ~ 5.7       |
| LTFC-1                                   |  |  |  |  | AL-FS                    | ~ 32.5       | 0.090 ± 0.011 | 2.82 ± 0.32 |
| LTFC-1                                   |  |  |  |  | AL-DS                    | ~ 34.7       | ~ 0.11        | 3.55 ± 0.45 |
| LTFC-2                                   |  |  |  |  | AL-FS                    | 13.50 ± 1.74 | 0.355 ± 0.033 | ~ 4.75      |
| LTFC-2                                   |  |  |  |  | AL-DS                    | 16.76 ± 1.87 | 0.286 ± 0.027 | ~ 4.8       |
| CTA membrane                             |  |  |  |  | Pure Water               | 4.2          |               | 0.19        |
| CTA membrane                             |  |  |  |  | Brackish Water, 3.67 g/L | 4.1          |               | --          |
| CTA membrane                             |  |  |  |  | Pure Water               | 3.6          | -             | 4.13        |
| CTA membrane                             |  |  |  |  | Brackish Water, 3.67 g/L | 3.2          |               | --          |
| Hydration                                |  |  |  |  | AL-FS                    | 1.65         |               | 1.14        |
| Technologies Inc. (HTI, Albany, OR, USA) |  |  |  |  | AL-DS                    | 1.67         | -             | 1.36        |
| Technologies Inc. (HTI, Albany, OR, USA) |  |  |  |  | AL-FS                    | 2.8          |               | 1.25        |

(199)

(200)

(201)

(202)

|                                                                  |                  |                                       |               |          |       |         |           |          |       |
|------------------------------------------------------------------|------------------|---------------------------------------|---------------|----------|-------|---------|-----------|----------|-------|
|                                                                  |                  |                                       | wt.%          |          | AL-DS | 3.27    |           | 1.47     |       |
|                                                                  |                  |                                       | 15            | ~ 17     | AL-FS | 3.45    |           | 2.45     |       |
|                                                                  |                  |                                       | wt.%          |          | AL-DS | 4.64    |           | 3.77     |       |
|                                                                  |                  |                                       | 20            | ~ 25     | AL-FS | 4.85    |           | 2.67     |       |
|                                                                  |                  |                                       | wt.%          |          | AL-DS | 7.36    |           | 5.89     |       |
|                                                                  | TFC              |                                       |               |          |       | 7.29    | 0.03567 M | 0.26 mMH |       |
|                                                                  | TFC-H1           |                                       |               |          |       | 12.46   | --        | --       |       |
|                                                                  | TFC-S-H0.5       |                                       |               |          |       | 18.72   | 0.01071   | 0.2      |       |
| PSF-<br>PA/PDA@SDS-<br>HNTs                                      | TFC-S-H1         | NaCl: Flux                            | 2 M           | DI Water | --    | 30.3    | 0.00482   | 0.18     | (203) |
|                                                                  | TFC-S-H1-<br>PDA | MgSO <sub>4</sub> : Reverse salt flux |               |          |       | 32.57   | 0.00184   | 0.06     |       |
|                                                                  | TFC-S-H2         |                                       |               |          |       | 27.27   | 0.0055    | 0.15     |       |
|                                                                  | TFC-S-H3         |                                       |               |          |       | 24.95   | 0.00561   | 0.14     |       |
|                                                                  |                  |                                       | 0% Dilution   |          | AL-FS | 17.6    |           | 1.19     |       |
|                                                                  |                  |                                       |               |          | AL-DS | 29.8    |           | 2.48     |       |
| HTI-CTA FO, Hydration<br>Technologies Inc. (HTI;<br>Albany, USA) |                  | Deep eutectic solvent, reline         | 200% Dilution | DI Water | AL-FS | ~ 10.5  | -         | ~ 0.35   | (204) |
|                                                                  |                  |                                       |               |          | AL-DS | ~ 16.5  |           | ~ 0.77   |       |
|                                                                  |                  |                                       | 500% Dilution |          | AL-FS | 3.1     |           | 0.15     |       |
|                                                                  |                  |                                       |               |          | AL-DS | 12.8    |           | 0.81     |       |
| ZSM-5 (Si/Al=18.6)                                               |                  |                                       |               |          |       | 1.52    |           | 15.3     |       |
| silicalite-1<br>(Si/Al = ∞)                                      | NaCl             |                                       | 5 wt.%        | DI Water | --    | < 0.0 L | -         | < 2.0    | (205) |
| CA-PA                                                            |                  |                                       |               |          | AL-FS | 26.1    | 0.15      | 3.5      |       |
|                                                                  |                  |                                       |               |          | AL-DS | 35      | 0.16      | 5        |       |
| CA-PA-PDA/PEI                                                    | NaCl             |                                       | 1 M           | DI Water | AL-FS | 33.1    | 0.115     | 3.5      | (206) |
|                                                                  |                  |                                       |               |          | AL-DS | 44      | 0.125     | 5        |       |
| CA-PA-PDA/PEI/Uio66 (0.05)                                       |                  |                                       |               |          | AL-FS | 37      | 0.1       | 3.5      |       |
|                                                                  |                  |                                       |               |          | AL-DS | 50      | 0.105     | 5        |       |



|                                            |             |       |       |          |          |       |       |       |       |   |       |
|--------------------------------------------|-------------|-------|-------|----------|----------|-------|-------|-------|-------|---|-------|
| CA-PA-PDA/PEI/Uio66 (0.1)                  |             |       |       |          | AL-FS    | 40    | 0.085 | 3.5   |       |   |       |
|                                            |             |       |       |          | AL-DS    | 54.5  | 0.9   | 5     |       |   |       |
| CA-PA-PDA/PEI/Uio66 (0.15)                 |             |       |       |          | AL-FS    | 35.5  | 0.95  | 3.5   |       |   |       |
|                                            |             |       |       |          | AL-DS    | 47    | 0.12  | 5     |       |   |       |
| PVDF-PA-Surfactant                         | TFC-0       |       |       |          | AL-FS    | 7.2   | 0.5   | 3     |       |   |       |
|                                            | TFC-Tween80 |       |       |          | AL-DS    | 12    | 0.62  | 6.5   |       |   |       |
| PVDF-PA-Surfactant                         | TFC-SDS     | NaCl  | 1 M   | DI Water | AL-FS    | 12    | 0.32  | 3     | (207) |   |       |
|                                            |             |       |       |          | AL-DS    | 21    | 0.29  | 6     |       |   |       |
|                                            | TFC-CTAC    | AL-FS | 14.5  | 0.14     | 2        |       |       |       |       |   |       |
|                                            |             | AL-DS | 22.5  | 0.12     | 2.5      |       |       |       |       |   |       |
|                                            | TFC-CTAT    | AL-FS | 21.7  | 0.04     | 0.9      |       |       |       |       |   |       |
|                                            |             | AL-DS | 31.8  | 0.05     | 1.6      |       |       |       |       |   |       |
|                                            | PSF-PA      | TFC-0 | NaCl  | 0.5 M    | DI Water | AL-FS | 12.5  | 0.135 |       | - | (208) |
|                                            |             |       |       | 1        |          |       | 16.86 | 0.136 |       |   |       |
| 1.5                                        |             | 20    | 0.14  |          |          |       |       |       |       |   |       |
| 2                                          |             | 23    | 0.14  |          |          |       |       |       |       |   |       |
| TFC-1 (n-hexane rinse of the active layer) |             | 0.5   | 16    | 0.145    |          |       |       |       |       |   |       |
|                                            |             | 1     | 21.16 | 0.16     |          |       |       |       |       |   |       |
|                                            |             | 1.5   | 24.5  | 0.165    |          |       |       |       |       |   |       |
|                                            |             | 2     | 27.5  | 0.165    |          |       |       |       |       |   |       |
| CTA-PDA/GO-Fe(III)-TA-PA                   | DMSO        | NaCl  | 1 M   | DI Water | AL-FS    | 7.5   | 3.1   | 22.5  | (209) |   |       |
|                                            | DMSO-s      |       |       |          | AL-DS    | 9.8   | 1.6   | 16    |       |   |       |
|                                            | NMP         |       |       |          | AL-FS    | 25.5  | 0.3   | 10    |       |   |       |
|                                            |             |       |       |          | AL-DS    | 34.4  | 0.27  | 10.9  |       |   |       |

|             |           |      |       |          |       |        |       |      |       |
|-------------|-----------|------|-------|----------|-------|--------|-------|------|-------|
|             |           |      |       |          | AL-DS | 17.783 | 2.2   | 39.4 |       |
|             | NMP-s     |      |       |          | AL-FS | 22     | 0.9   | 22.5 |       |
|             |           |      |       |          | AL-DS | 27.7   | 0.7   | 19.9 |       |
|             | Dioxane   |      |       |          | AL-FS | 3.5    | 0.3   | 2    |       |
|             |           |      |       |          | AL-DS | 3.79   | 0.7   | 3.36 |       |
|             | Dioxane-s |      |       |          | AL-FS | 2      | 0.8   | 3    |       |
|             |           |      |       |          | AL-DS | 2      | 0.8   | 1    |       |
| CTA-        |           |      |       |          | AL-FS | 9      | 2.75  | 27.5 |       |
| PDA/GO-Fe   | DMAC      |      |       |          | AL-DS | 16     | 1.65  | 29.5 |       |
| (III)-TA-PA |           |      |       |          | AL-FS | 15.5   | 3.75  | 56   |       |
|             | DMAC-s    |      |       |          | AL-DS | 21.75  | 3.7   | 77.5 |       |
|             |           |      |       |          | AL-FS | 21     | 0.35  | 7.7  |       |
| TFN1        |           |      |       |          | AL-DS | 25.5   | 0.32  | 8.2  |       |
|             |           |      |       |          | AL-FS | 22.5   | 0.275 | 6.4  |       |
| TFN2        |           | NaCl | 1 M   | DI Water | AL-DS | 31     | 0.28  | 8.8  |       |
|             |           |      |       |          | AL-FS | 22.5   | 0.19  | 4.5  |       |
| TFN3        |           |      |       |          | AL-DS | 35.8   | 0.155 | 5.84 |       |
|             |           |      |       |          | AL-FS | 22.5   | 0.27  | 6.2  |       |
| TFN4        |           |      |       |          | AL-DS | 28.75  | 0.23  | 7    |       |
|             |           |      |       |          | AL-FS | 14.63  | --    | 3.5  |       |
|             |           |      | 0.5 M |          | AL-DS | 40     | --    | 13   |       |
|             | TFC       |      |       |          | AL-FS | 18.91  | 0.32  | 5.96 |       |
|             |           |      | 1 M   |          | AL-DS | 48     | 0.39  | 18   |       |
| PES-        |           |      |       |          | AL-FS | 25.1   | --    | 10   | (210) |
| PA/WS2-     |           | NaCl | 1.5 M | DI Water | AL-DS | 54     | --    | 23   |       |
| Cys-MOF     |           |      |       |          | AL-FS | 24     | 0.3   | 7    |       |
|             | TFN-0.05  |      | 1 M   |          | AL-DS | 51     | 0.385 | 21   |       |
|             |           |      |       |          | AL-FS | 29.42  | --    | 8    |       |
|             | TFN-0.1   |      | 0.5 M |          |       |        |       |      |       |

|                                                       |          |                                                          |        |          |       |              |       |            |                 |
|-------------------------------------------------------|----------|----------------------------------------------------------|--------|----------|-------|--------------|-------|------------|-----------------|
|                                                       |          |                                                          |        |          | AL-DS | 58           | --    | 17         |                 |
|                                                       |          |                                                          | 1 M    |          | AL-FS | 38.91        | 0.26  | 10.39      |                 |
|                                                       |          |                                                          |        |          | AL-DS | 67.1         | 0.34  | 23         |                 |
|                                                       |          |                                                          | 1.5 M  |          | AL-FS | 45.6         | --    | 12         |                 |
|                                                       |          |                                                          |        |          | AL-DS | 75           | --    | 27         |                 |
| PES-PA/WS2-Cys-MOF                                    | TFN-0.25 |                                                          | 1 M    |          | AL-FS | 32           | 0.28  | 9          |                 |
|                                                       |          |                                                          |        |          | AL-DS | 57           | 0.355 | 20.5       |                 |
| No interlayer                                         | TFC      |                                                          |        |          | AL-FS | 17           | 0.32  | 5.9        |                 |
|                                                       |          |                                                          |        |          | AL-DS | 23           | 0.44  | 10.2       |                 |
|                                                       | M-SU2    |                                                          |        |          | AL-FS | 26           | 0.15  | 4          |                 |
| SA/UiO-66-NH <sub>2</sub> interlayer                  | M-SU4    | NaCl                                                     | 1 M    | DI Water | AL-DS | 36           | 0.22  | 7.9        | (211)           |
|                                                       |          |                                                          |        |          | AL-FS | 28           | 0.1   | 2.8        | Li <sup>+</sup> |
|                                                       | M-SU5    |                                                          |        |          | AL-DS | 44.5         | 0.16  | 7          | rejection       |
|                                                       |          |                                                          |        |          | AL-FS | 19           | 0.19  | 3.9        |                 |
| UiO-66-NH <sub>2</sub> interlayer                     | M-U      |                                                          |        |          | AL-DS | 39.8         | 0.23  | 9.2        |                 |
|                                                       |          |                                                          |        |          | AL-FS | 24.5         | 0.17  | 4.4        |                 |
|                                                       |          |                                                          |        |          | AL-DS | 32           | 0.255 | 8.2        |                 |
| PAN-Dopamine-PSSMA/PDADM                              |          | NaCl                                                     | 1 M    | DI Water | --    | 3            | --    | 3.9        | (212)           |
| PSF/PA: PA-I                                          |          | NaCl                                                     | 1 M    | DI Water | AL-DS | 125.2 ± 10.0 | --    | 44.7 ± 8.1 | (213)           |
| PSF/PA-APTMS-TiO <sub>2</sub> : APTMS-TFN0.05         |          | NaCl                                                     | 1 M    | DI Water | AL-FS | 18.14        | 0.40  | --         | (214)           |
| PSF/PA Sulfonamide: ST                                |          | NaCl                                                     | 1 M    | DI Water | AL-FS | 22.6         | 0.13  | 2.94       | (188)           |
| Commercial Sterlitech CF042 Delrin FO cell - Porifera |          | Poly(amidoamine) dendrimer coated magnetic nanoparticles | 30 g/L | DI Water | AL-FS | 12.9         | --    | --         | (171)           |

|                                                                                 |                                                                      |                |                           |       |       |        |       |       |
|---------------------------------------------------------------------------------|----------------------------------------------------------------------|----------------|---------------------------|-------|-------|--------|-------|-------|
| PMIA/PA TFC FO: M2                                                              | NaCl                                                                 | 1 M            | DI Water                  | AL-FS | 32.35 | --     | 5.38  | (197) |
| CTA-ES FO (HTI Company, Albany, OR, USA)                                        | NaCl + Polyethylene glycol tert-octylphenyl ether surfactant (TX114) | 0.3 M + 0.6 mM | Synthetic & Real Seawater | AL-DS | 21.26 | 1.82   | 37.04 | (215) |
| CA-PDA/PEI/UiO-66(0.1)                                                          | NaCl                                                                 | 1 M            | DI Water                  | AL-FS | 40.0  | --     | 3.2   | (206) |
| PEI:rGO/pDA                                                                     | dextrose                                                             | 0.5 M          | NaCl 0.1 M                | AL-FS | 25.5  | --     | 0.91  | (216) |
| CA HF-25-3:2-4.0-A                                                              | NaCl                                                                 | 0.5 M          | DI Water                  | AL-FS | 2.8   | 0.61   | 1.7   | (217) |
| PES-Polyvinylamines-poly(allylamine hydrochloric): PVAm(50) & PSS(70), pH=7-AAV | MgCl <sub>2</sub>                                                    | 0.5 M          | DI Water                  | AL-FS | 33    | 1/13.4 | 2.3   | (218) |
| SF-mLbL PA-GO                                                                   | NaCl                                                                 | 0.5 M          | DI Water                  | AL-FS | 52    | 0.065  | 3.5   | (219) |
|                                                                                 |                                                                      | 0.75 M         |                           | AL-FS | 61    | 0.07   | 4.2   |       |
|                                                                                 |                                                                      | 1 M            |                           | AL-FS | 68    | 0.074  | 5     |       |
|                                                                                 |                                                                      | 1.5 M          |                           | AL-FS | 83    | 0.069  | 5.8   |       |
|                                                                                 |                                                                      | 0.5 M          |                           | AL-FS | 53    | 0.067  | 3.6   |       |
|                                                                                 |                                                                      | 0.75 M         |                           | AL-FS | 65    | 0.07   | 4.3   |       |
|                                                                                 |                                                                      | 1 M            |                           | AL-FS | 70    | 0.073  | 5.1   |       |
|                                                                                 |                                                                      | 1.5 M          |                           | AL-FS | 84    | 0.07   | 5.95  |       |
|                                                                                 |                                                                      | 0.5 M          |                           | AL-FS | 55    | 0.069  | 3.7   |       |
|                                                                                 |                                                                      | 0.5            |                           | AL-DS | --    | --     | --    |       |
|                                                                                 |                                                                      | 0.75 M         |                           | AL-FS | 64    | 0.073  | 4.7   |       |
|                                                                                 |                                                                      | 0.75           |                           | AL-DS | --    | --     | --    |       |
|                                                                                 |                                                                      | 1 M            |                           | AL-FS | 72    | 0.074  | 5.35  |       |
|                                                                                 |                                                                      | 1              |                           | AL-DS | --    | --     | --    |       |
|                                                                                 |                                                                      | 1.5 M          |                           | AL-FS | 84.5  | 0.074  | 6.2   |       |
| 1.5                                                                             | AL-DS                                                                | --             | --                        | --    |       |        |       |       |
| 0.05-TFNi                                                                       | 0.5 M                                                                | AL-FS          | 73                        | 0.061 | 4.5   |        |       |       |

|                             |                                                                                                |                           |          |        |       |                 |       |       |             |
|-----------------------------|------------------------------------------------------------------------------------------------|---------------------------|----------|--------|-------|-----------------|-------|-------|-------------|
| SF-mLbL<br>PA-GO            | NaCl                                                                                           | DI Water                  | 0.75 M   | AL-FS  | 83.5  | 0.065           | 5.6   | (219) |             |
|                             |                                                                                                |                           | 1 M      | AL-FS  | 100   | 0.066           | 6.6   |       |             |
|                             |                                                                                                |                           | 1.5 M    | AL-FS  | 125   | 0.063           | 7.8   |       |             |
|                             |                                                                                                |                           | 0.5 M    | AL-FS  | 73.5  | 0.055           | 4.1   |       |             |
|                             |                                                                                                |                           | 0.1-TFNi | 0.75 M | AL-FS | 100             | 0.056 |       | 5.55        |
|                             |                                                                                                |                           | 1 M      | AL-FS  | 118   | 0.055           | 6.5   |       |             |
|                             |                                                                                                |                           | 1.5 M    | AL-FS  | 132   | 0.057           | 7.4   |       |             |
|                             |                                                                                                |                           | 0.3-TFNi | 0.5 M  | AL-FS | 75              | 0.058 |       | 4.45        |
|                             |                                                                                                |                           | 0.75 M   | AL-FS  | 108   | 0.054           | 5.9   |       |             |
|                             |                                                                                                |                           | 1 M      | AL-FS  | 125   | 0.053           | 6.7   |       |             |
|                             |                                                                                                |                           | 1.5 M    | AL-FS  | 135   | 0.059           | 8.05  |       |             |
|                             |                                                                                                |                           | 0.5-TFNi | 0.5 M  | AL-FS | 85              | 0.059 |       | 5.04        |
|                             |                                                                                                |                           | 0.75 M   | AL-FS  | 117   | 0.051           | 6     |       |             |
|                             |                                                                                                |                           | 1 M      | AL-FS  | 135   | 0.053           | 7.4   |       |             |
|                             |                                                                                                |                           | 1.5 M    | AL-FS  | 161   | 0.056           | 8.8   |       |             |
|                             |                                                                                                |                           | 0.7-TFNi | 0.5 M  | AL-FS | 87.18 ±<br>0.15 | 0.058 |       | 5.06 ± 0.11 |
|                             |                                                                                                |                           | 0.5      | AL-DS  | --    | --              | --    |       |             |
|                             |                                                                                                |                           | 0.75     | AL-FS  | 119   | 0.051           | 5.55  |       |             |
|                             |                                                                                                |                           | 0.75     | AL-DS  | --    | --              | --    |       |             |
|                             |                                                                                                |                           | 1        | AL-FS  | 135   | 0.054           | 7.5   |       |             |
|                             |                                                                                                |                           | 1        | AL-DS  | --    | --              | --    |       |             |
| 1.5                         | AL-FS                                                                                          | 162                       | 0.056    | 8.85   |       |                 |       |       |             |
| 1.5                         | AL-DS                                                                                          | --                        | --       | --     |       |                 |       |       |             |
| Hydration Technologies Inc. | Tributylalkylphosphonium 3-sulfopropyl Methacrylate ([P <sub>4446</sub> ][C <sub>3</sub> S ILs | 258 mOsm kg-<br>1/7.5 wt% | DI Water | AL-DS  | 4.49  | --              | 1.64  | (220) |             |

|                                                                                                                                                     |                                                                                       |          |          |       |         |        |      |       |
|-----------------------------------------------------------------------------------------------------------------------------------------------------|---------------------------------------------------------------------------------------|----------|----------|-------|---------|--------|------|-------|
| Hydration Technologies Inc.<br>(Albany, Oregon, USA)                                                                                                | Imidazolium-based magnetic<br>ionic liquids (MILs), C <sub>8</sub> -FeCl <sub>4</sub> | 20 wt. % | DI Water | AL-FS | 10.04   | -      | -    | (221) |
|                                                                                                                                                     |                                                                                       |          |          | AL-DS | 17.3    |        |      |       |
| PES/PA: TFC-PEG-diamine-0.2                                                                                                                         | NaCl                                                                                  | 1 M      | DI Water | AL-FS | 23.3    | 0.07   | 1.6  | (222) |
| CA/PA: CA/PA-DMF4-ME1                                                                                                                               | Na <sub>2</sub> S <sub>2</sub> O <sub>4</sub>                                         | 1 M      | DI Water | AL-FS | 9.2     | 1/2000 | --   | (223) |
| PES/PSF/PEG: PEG1                                                                                                                                   | NaCl                                                                                  | 1 M      | DI Water | AL-FS | 136     | 0.014  | 1.94 | (224) |
| PSU/PEG- <i>b</i> -PSU- <i>b</i> -PEG/PA:<br>TFC/PEG-1                                                                                              | NaCl                                                                                  | 1.5 M    | DI Water | AL-FS | 22.29   | 0.11   | 2.45 | (225) |
| N-C-dots/PEI-M                                                                                                                                      | NaCl                                                                                  | 2 M      | UP water | AL-FS | 26      | --     | 8.25 | (226) |
| PES/STA: TFC-STA                                                                                                                                    | NaCl                                                                                  | 1 M      | DI Water | AL-FS | 27.4    | 0.047  | 1.3  | (227) |
| PES-Na <sub>14</sub> (P <sub>2</sub> W <sub>18</sub> Co <sub>4</sub> O <sub>70</sub> )·28H <sub>2</sub> O-<br>LDH (POM-LDH)/PA: TFN-PL <sub>2</sub> | NaCl                                                                                  | 1 M      | DI Water | AL-FS | 46.6    | 0.23   | 10.8 | (228) |
| PES-PAM-grafted ZnO NPs/PA:<br>TFN-ZP400                                                                                                            | NaCl                                                                                  | 1 M      | DI Water | AL-FS | 20.7    | 0.12   | 2.5  | (229) |
| PSF-ZnO-PA: TFN 1% in-situ                                                                                                                          | NaCl                                                                                  | 1 M      | DI Water | AL-FS | 33      | 0.085  | 2.9  | (230) |
| PES-CNF-g-PSBMA/PA:<br>TFN100                                                                                                                       | NaCl                                                                                  | 1 M      | DI Water | AL-FS | 16.3    | 0.12   | 2    | (231) |
| Diazotized PE-PA TFC: TFC5-N                                                                                                                        | NaCl                                                                                  | 2 M      | DI Water | AL-FS | 57      | 0.35   | --   | (232) |
| PAN-PA/BWD-NCQDs: TFC-<br>0.05                                                                                                                      | NaCl                                                                                  | 1 M      | DI Water | AL-DS | 35.3    | 0.15   | 5.5  | (233) |
| Chitosan nanofiber-PA                                                                                                                               | Na <sub>2</sub> SO <sub>4</sub>                                                       | --       | DI Water | AL-FS | 128     | 0.24   | --   | (175) |
| PES-PA: PES-250                                                                                                                                     | NaCl                                                                                  | 0.5      | DI Water | AL-FS | 1.0     | 0.07   | 0.07 | (234) |
| PSF- MIL-53(Fe)/PA                                                                                                                                  | NaCl                                                                                  | 2 M      | DI Water | AL-FS | 11.4    | 0.45   | 5.08 | (235) |
| PES- alginate/Ca (II)<br>interlayer/PA: TFC-LbL.5                                                                                                   | NaCl                                                                                  | 1 M      | DI Water | AL-FS | 23.3    | 0.02   | 0.6  | (236) |
| PES-tetra-(4-<br>carboxyphenyl)porphyrin (Al-<br>MOF)/PA: iTFC-0.2                                                                                  | NaCl                                                                                  | 2 M      | DI Water | AL-FS | 21.26   | 0.04   | 0.93 | (237) |
| PAN/PA: PAN-C3 (90 °C)                                                                                                                              | NaCl                                                                                  | 1 M      | DI Water | AL-FS | 103.0 ± | 0.35   | 37   | (238) |

|                                                                                                                                            |                                                                                 |             |                                                                                            |       |              |               |              |       |  |
|--------------------------------------------------------------------------------------------------------------------------------------------|---------------------------------------------------------------------------------|-------------|--------------------------------------------------------------------------------------------|-------|--------------|---------------|--------------|-------|--|
|                                                                                                                                            |                                                                                 |             |                                                                                            |       |              | 8.2           |              |       |  |
| PSF/chitosan                                                                                                                               | EDTA-2Na+Triton X100                                                            | 1 M + 0.5 M | DI Water                                                                                   | AL-FS | 9.5          | 0.008 ± 0.002 | 0.08         | (239) |  |
| PES-PDA/GO/PA: TFC4                                                                                                                        | NaCl                                                                            | 0.5 M       | DI Water                                                                                   | AL-DS | 36           | 0.56          | 21.5         | (240) |  |
| MoS <sub>2</sub> @NH <sub>2</sub> -UiO-66 TFN with interlayer (TFNi)/PA: M2 (MoS <sub>2</sub> @NH <sub>2</sub> -UiO-66 load was 0.002 wt%) | NaCl                                                                            | 2 M         | DI Water                                                                                   | AL-FS | 38.13 ± 0.8  | 0.038         | 1.48 ± 0.06  | (241) |  |
| Asymmetric cellulose acetate hollow fiber FO: HF-25-3:2-4.0-A                                                                              | NaCl                                                                            | 0.5 M       | DI Water                                                                                   | AL-DS | 2.8          | 0.61          | 1.7          | (217) |  |
| MoS <sub>2</sub> @Zeolite X Nanocomposite (PES/PA)-Modified TFN FO: TFN-MZ2                                                                | NaCl                                                                            | 1 M         | DI Water                                                                                   | AL-FS | 50.37        | --            | 22.85        | (242) |  |
| PSF/PMMA-b-PSF-b-PMMA triblock copolymer-modified/PA TFC FO: TFC20                                                                         | NaCl                                                                            | 1 M         | DI Water                                                                                   | AL-FS | 17.5         | 0.15          | 2.0          | (243) |  |
| PAN NF/Dopamine/poly diallyl dimethyl ammonium and poly(4-styrenesulfonic acid-co-maleic acid) sodium salt: MMM-0.1-LbL5                   | NaCl                                                                            | 1 M         | DI Water                                                                                   | AL-DS | 3            | --            | 3.9          | (212) |  |
| PES-PA/NH <sub>2</sub> -GOQDs: TFC100                                                                                                      | NaCl                                                                            | 0.5 M       | DI Water                                                                                   | AL-FS | 58.32 ± 4.05 | 0.21          | 11.00 ± 1.25 | (244) |  |
| Aquaporin flat sheet membrane                                                                                                              | Temperature-sensitive hydrogel modified with sewage sludge ash (SSA): (SSA-TSH) | --          | Potassium dichromate (K <sub>2</sub> Cr <sub>2</sub> O <sub>7</sub> ), glucose monohydrate | AL-FS | 1.992-2.044  | --            | --           | (245) |  |

|                                                                            |                                                 |       |                        |                                                                                                                                                                                                    |       |      |       |       |  |
|----------------------------------------------------------------------------|-------------------------------------------------|-------|------------------------|----------------------------------------------------------------------------------------------------------------------------------------------------------------------------------------------------|-------|------|-------|-------|--|
|                                                                            |                                                 |       |                        | (C <sub>6</sub> H <sub>12</sub> O <sub>6</sub> ·H <sub>2</sub> O),<br>potassium<br>dihydrogen<br>phosphate<br>(KH <sub>2</sub> PO <sub>4</sub> ), and<br>ammonium<br>chloride (NH <sub>4</sub> Cl) |       |      |       |       |  |
| TFC PVDF/chitosan-tannic<br>acid <sub>0.5-60 min</sub>                     | (NH <sub>4</sub> ) <sub>2</sub> SO <sub>4</sub> | 1 M   | NaF, 300 mg/L          | AL-DS                                                                                                                                                                                              | 38.2  | --   | 0.151 | (246) |  |
|                                                                            |                                                 | 0.5 M |                        | AL-FS                                                                                                                                                                                              | 7     | --   | 6.5   |       |  |
|                                                                            |                                                 | 1 M   |                        | AL-FS                                                                                                                                                                                              | 12    | --   | 10    |       |  |
|                                                                            |                                                 | 1.5 M |                        | AL-FS                                                                                                                                                                                              | 13    | --   | 14    |       |  |
|                                                                            |                                                 | 2 M   |                        | AL-FS                                                                                                                                                                                              | 16    | --   | 15    |       |  |
| Support-free<br>IP on macroporous<br>substrate                             |                                                 | 0.5 M |                        | AL-FS                                                                                                                                                                                              | 8.5   | --   | 3.75  |       |  |
|                                                                            | NaCl                                            | 1 M   | DI water               | AL-FS                                                                                                                                                                                              | 14    | --   | 7     | (247) |  |
|                                                                            |                                                 | 1.5 M |                        | AL-FS                                                                                                                                                                                              | 13.5  | --   | 7.5   |       |  |
|                                                                            |                                                 | 2 M   |                        | AL-FS                                                                                                                                                                                              | 17.5  | --   | 8.5   |       |  |
|                                                                            |                                                 | 0.5 M |                        | AL-FS                                                                                                                                                                                              | 16    | --   | 5     |       |  |
|                                                                            |                                                 | 1 M   |                        | AL-FS                                                                                                                                                                                              | 21    | --   | 6.5   |       |  |
|                                                                            |                                                 | 1.5 M |                        | AL-FS                                                                                                                                                                                              | 23    | --   | 7.5   |       |  |
|                                                                            |                                                 | 2 M   |                        | AL-FS                                                                                                                                                                                              | 26    | --   | 9     |       |  |
| Vanadium pentoxide (VO)-aSiO-<br>rGO                                       | NaCl                                            | 1 M   | DI Water               | AL-DS                                                                                                                                                                                              | 45    | 0.13 | 6.1   | (248) |  |
| NTFC-FO: PANI@PAN/PVDF<br>electrospinning nanofibers<br>(PPESNF)/PA: NTFC1 | NaCl                                            | 1 M   | DI Water               | AL-FS                                                                                                                                                                                              | 40    | 0.12 | 4.8   | (249) |  |
|                                                                            |                                                 |       | DI Water,<br>synthetic | AL-FS                                                                                                                                                                                              | 12.08 | 1.38 | 17    |       |  |



|                                                                                              |                                   |                 |                                                                                        |       |               |        |        |       |
|----------------------------------------------------------------------------------------------|-----------------------------------|-----------------|----------------------------------------------------------------------------------------|-------|---------------|--------|--------|-------|
|                                                                                              | surfactant (TX114)                |                 | seawater, TDS=36 000 ppm and real seawater collected at Ninh Thuan province of Vietnam |       |               |        |        |       |
| CTA-FO                                                                                       | Na-CQDs                           |                 | DI Water                                                                               | AL-FS | 13.92         | 0.0018 | 0.0253 | (250) |
|                                                                                              | K-CQDs                            | 0.3 to 0.5 g/mL | 3.5 wt% NaCl solution                                                                  |       |               |        |        |       |
| PVC/PA: TB1                                                                                  | KCl                               | 1 M             | DI Water                                                                               | AL-FS | 14.68         | 0.210  | 3.08   | (251) |
|                                                                                              | NaCl                              |                 |                                                                                        |       | 11.94         | 0.278  | 3.32   |       |
| TFC/sPSUH-3                                                                                  | NaCl                              | 1 M             | DI Water                                                                               | AL-FS | 34.27         | 0.16   | --     | (252) |
| TFC/sPSUH-4                                                                                  |                                   |                 |                                                                                        |       | 34.94         | 0.16   | --     |       |
| Cellulose triacetate (CTA) flat sheet membrane (Hydration Technology Inc., HTI, Oregon, USA) | <i>Rhamnolipid</i> bio-surfactant | 200 mg/L        | Synthetic Caspian seawater salinity of ~13 ppt                                         | AL-FS | 7.7           | -      | 0.088  | (253) |
|                                                                                              | NaCl                              | 70 mg/L         |                                                                                        |       | 8.6           | -      | 4.8    |       |
| FTS H <sub>2</sub> O CTA FO flat sheet (Sterlitech)                                          | 1-PDMAAm                          | 50 wt.%         | > 170 bar                                                                              | AL-FS | NaCl 0.2 wt.% | 89     |        | (254) |
|                                                                                              |                                   |                 |                                                                                        |       | 1.75 wt.%     | 81     | -      |       |
|                                                                                              |                                   |                 |                                                                                        |       | 3.5 wt.%      | 77     | -      |       |

**Table S5.** Hybrid organic-inorganic membranes used for desalination and heavy metals removal in 2023-2024.

| Membrane matrix                                                                                                               | Feature                      | Pollutant                                                                          | Permeability (L/m <sup>2</sup> .h.bar)                                                                   | Rejection (%)                                     | Ref.  |
|-------------------------------------------------------------------------------------------------------------------------------|------------------------------|------------------------------------------------------------------------------------|----------------------------------------------------------------------------------------------------------|---------------------------------------------------|-------|
| PA-NF incorporated with amino-functionalized Ti <sub>3</sub> C <sub>2</sub> T <sub>x</sub> nanoparticles                      | High harness removal         | MgSO <sub>4</sub>                                                                  | PA-NF incorporated with amino-functionalized Ti <sub>3</sub> C <sub>2</sub> T <sub>x</sub> nanoparticles | High harness removal                              | (255) |
| Graphene oxide hybrid membrane - Fe <sub>3</sub> O <sub>4</sub> @amyloid fibrils nanoclusters intercalated into the GO sheets | Heavy metals removal         | As (III), Pb (II), Cd (II), Hg (II), Cu (II), Zn (II), Ni (II), Co (II) & Cr (III) | ---                                                                                                      | > 99.9                                            | (256) |
| PSF/ hydroxyapatite dual-layer hollow fiber membrane                                                                          | Lead Removal                 | Pb (II)                                                                            | 5-115                                                                                                    | 141.2 mg/g absorption capacity                    | (257) |
| PVDF/rGO nanocomposite membrane                                                                                               | Heavy metals removal         | Cu (II), Cd (II), Zn (II), Mn (II) & As (III)                                      | 175.86-412.20 L/m <sup>2</sup> h                                                                         | Up to 90 for divalent cations and 90 for As (III) | (41)  |
| ZIF-67/PP hybrid membrane                                                                                                     | U (VI) extraction technology | U (VI)                                                                             | --                                                                                                       | --                                                | (258) |
| UiO-66-AO-based adsorption-                                                                                                   | Uranium                      | U (VI)                                                                             | 1358.8 / m h                                                                                             | 84.5                                              | (259) |

|                                                                |                                                        |                                                  |                                                                        |                                |       |
|----------------------------------------------------------------|--------------------------------------------------------|--------------------------------------------------|------------------------------------------------------------------------|--------------------------------|-------|
| filtration hybrid membranes                                    | extraction                                             |                                                  |                                                                        |                                |       |
| surface coating of metal-phenolic networks on activated carbon | Selective Separation of Pb (II)                        | Pb (II)                                          | --                                                                     | 60-100                         | (260) |
| Cellulose acetate-ZnO                                          | Lead removal                                           | Pb (II)                                          | --                                                                     | Up to 97                       | (261) |
| MIL-101(Cr) and MIL-101(Cr)@GO doped PVA                       | Desalination by pervaporation                          | NaCl                                             | 9.7 kg/m <sup>2</sup> h                                                | > 99.99                        | (262) |
| Carboxyl Functionalization of Hybrid Organosilica RO           | Desalination                                           | NaCl, MgCl <sub>2</sub> , MgSO <sub>4</sub>      | ~ 3.5, 3.2, 3 ( $\times 10^{-13}$ m <sup>3</sup> m <sup>-2</sup> s.Pa) | ~ 97-99                        | (263) |
| UiO-66-NH <sub>2</sub> /PVDF hybrid fibrous membrane           | Bifunctional adsorption and photo-catalysis            | Cr(VI)                                           | --                                                                     | ~ 95                           | (264) |
| SiO <sub>2</sub> /PVDF-TMC                                     | Membrane distillation                                  | NaCl                                             | 16.08 kg/(m <sup>2</sup> ·h)                                           | > 99.9 %                       | (265) |
| UiO-66-(OH) <sub>2</sub> @Fe <sub>2</sub> O <sub>3</sub> /CFs  | Phosphate removal                                      | Phosphate, sulfate, carbonate, chloride, nitrate | --                                                                     | 333.3 mg/g adsorption capacity | (266) |
| PVDF/SMA@ polyvinylamine (PVAM)-tannic acid (TA)-metal ion     | High permselectivity                                   | Mg (II) & Ca (II)                                | 53.4                                                                   | > 99                           | (267) |
| PSF -GO/hydroxalcite                                           | Treatment of lead ion from battery industrial effluent | Pb (II)                                          | 182.6-193.5 L/m <sup>2</sup> h                                         | 96                             | (268) |
| TPU-Laponite/GO                                                | Selective adsorption of water                          | Pb (II) & As (V)                                 | 53.4                                                                   | 54-99 % & 16-94 %              | (62)  |

| contaminants                       |                                |                                                                                   |                              |                                |       |
|------------------------------------|--------------------------------|-----------------------------------------------------------------------------------|------------------------------|--------------------------------|-------|
| PAN nanofibers-Tb-based MOF        | efficient phosphate removal    | Phosphate                                                                         | ---                          | 111.3 mg/g adsorption capacity | (269) |
| Hydrophilic nylon/Ag-rGO           | desalination                   | NaCl, Na <sub>2</sub> SO <sub>4</sub> , MgCl <sub>2</sub> , and MgSO <sub>4</sub> | 1.2                          | 70, 97, 30, 72                 | (270) |
| PES-Na-A zeolite/oxycut residue NF | Cr (III) removal               | Cr (III)                                                                          | --                           | 98                             | (271) |
| PTL/PES                            | Antifouling properties         | Cu (II), Ni (II), Cd (II), Pb (II)                                                | 39.5                         | > 99                           | (272) |
| PVDF/PVP/MMT MMM                   | Heavy metal ions removal       | Pb (II) and Cd (II)                                                               | 13.8-19.8 L/m <sup>2</sup> h | 83 & 87                        | (74)  |
| ANF/MoS <sub>2</sub>               | Pb (II) removal                | Pb (II)                                                                           | ~ 160                        | 75                             | (273) |
| PET-PAN Electrospun-LDHs           | Cr(VI) & methyl orange removal | Cr (VI)                                                                           | ---                          | 80                             | (274) |
| ZIF-8/TA                           | Improved permeation            | NaCl                                                                              | 56 L/m <sup>2</sup> h        | ~ 99                           | (275) |
| PPG-UiO-66@PTFE                    | Efficient mercury extraction   | Hg (II)                                                                           | --                           | 98                             | (276) |

## References

1. Wang D, Tian M, Han S, Ding K, Yin L, Zhu J, et al. Enhanced performance of thin-film nanocomposite membranes achieved by hierarchical zeolites for nanofiltration. *Journal of Membrane Science*. 2023;671:121405.
2. Cheng D, Chen Y, Zhang Z, Wang X, Wang M, Duan Q, et al. Incorporating of  $\beta$ -cyclodextrin based nanosheet for advanced thin-film nanocomposite nanofiltration membrane with improved separation and anti-fouling performances. *Journal of Membrane Science*. 2023;685:121969.
3. Zhu J, Meng W, Xue Q, Zhang K. Two dimensional sulfonated molybdenum disulfide (S-MoS<sub>2</sub>) thin-film nanocomposite nanofiltration membrane for selective desalination. *Journal of Membrane Science*. 2023;676:121574.
4. Zhao Z-Z, Wang T, Zheng X, Ren Y, Zhao Z-P. MOF-808/Polyamide Thin-Film Nanocomposite Membranes for Efficient Nanofiltration. *ACS Applied Nano Materials*. 2023;6(19):17615-25.
5. Mandal JR, Mondal M. Removal of arsenic from water using a CuBTC incorporated thin film nanocomposite hollow fiber membrane by interfacial polymerization on lumen side. *Journal of Water Process Engineering*. 2023;52:103587.
6. Wu J, Gao J, Chen S-B, Chung T-S. Solvent-activated Thin-film nanocomposite membranes molecularly tuned with Macrocyclic cavities for efficient water desalination and boron removal. *Chemical Engineering Journal*. 2023:143982.
7. Yang F, Cui F, Di Yuan Y, Yu X, Zhao D. Mechanistic insights into the role of nanoparticles towards the enhanced performance of thin-film nanocomposite membranes. *Journal of Membrane Science Letters*. 2023;3(1):100046.
8. Fouladi M, Kavousi Heidari M, Tavakoli O. Performance comparison of thin-film nanocomposite polyamide nanofiltration membranes for heavy metal/salt wastewater treatment. *Journal of Nanoparticle Research*. 2023;25(4):77.
9. Mahlangu OT, Mamba G, Mamba BB. A facile synthesis approach for GO-ZnO/PES ultrafiltration mixed matrix photocatalytic membranes for dye removal in water: Leveraging the synergy between photocatalysis and membrane filtration. *Journal of Environmental Chemical Engineering*. 2023;11(3):110065.

10. Amiri S, Vatanpour V, He T. Antifouling thin-film nanocomposite NF membrane with polyvinyl alcohol-sodium alginate-graphene oxide nanocomposite hydrogel coated layer for As (III) removal. *Chemosphere*. 2023;322:138159.
11. Huo H-Q, Mi Y-F, Yang X, Lu H-H, Ji Y-L, Zhou Y, et al. Polyamide thin film nanocomposite membranes with in-situ integration of multiple functional nanoparticles for high performance reverse osmosis. *Journal of Membrane Science*. 2023;669:121311.
12. Wang X, Liu Y, Fan K, Cheng P, Xia S, Qian L. Construction of thin-film nanocomposite membranes by incorporating acyl chloride@ MoS<sub>2</sub> for enhanced nanofiltration performance. *Separation and Purification Technology*. 2023;319:124078.
13. Chua SF, Nouri A, Mahmoudi E, Ang WL, Mohammad AW. Modified-graphene quantum dot thin-film nanocomposite membrane for enhanced nanofiltration performance and antifouling properties: Minimal incorporation. *Journal of Water Process Engineering*. 2023;53:103664.
14. Su T, Li X, Yang Z-M, Liu L-F. A novel polyamide thin-film nanocomposite reverse osmosis membrane constructed by a 3D multi-layer graphene oxide assembled with 1, 3-diamino-2-propanol. *Journal of Membrane Science*. 2023:121773.
15. Aktij SA, Hosseinijad M, Firouzjaei MD, Farhadi S, Elliott M, Rahimpour A, et al. High perm-selectivity and performance of tuned nanofiltration membranes by merging carbon nitride derivatives as interphase layer for efficient water treatment. *Journal of Water Process Engineering*. 2023;56:104432.
16. Wu Z, Zeng J, Yuan Z, Zhang R, Huang X, Feng F, et al. Polyamide/UiO-66-NH<sub>2</sub> nanocomposite membranes by polyphenol interfacial engineering for molybdenum (VI) removal. *Desalination*. 2023;563:116716.
17. Lai Y, He J, Li Y, Zhou S, Yan W, Zhou Y, et al. Preparation of hydrophilic modified ZIF-8 and its application in the preparation of nanocomposite matrix reverse osmosis membrane with improved permeation performance. *Journal of Coatings Technology and Research*. 2023:1-10.
18. Wu L-K, Xu Z-L, Tong M, Li E-C, Tang Y-J. Dissecting the role of nanomaterials on permeation enhancement of the thin-film nanocomposite membrane: ZIF-8 as an example. *Journal of Membrane Science*. 2023;673:121494.
19. Azad H, Mohsennia M, Cheng C, Amini A. Alkaline treatment of antifoulant PVB/SA-grafted  $\epsilon$ -MnO<sub>2</sub> adsorptive nanocomposite membrane for synchronous separation of pollutants from pharmaceutical effluents. *Journal of Water Process Engineering*. 2023;53:103756.
20. Li P, Gu Z, Bai C, Xu Y, Tang J, Ren J, et al. Effects of MOFs size and functional group on the pore structure and performance of thin-film nanocomposite membranes. *Journal of Membrane Science*. 2023;686:121979.
21. Jiang Q, Wang Y, Li Y, Luo J, Xiong J. Nanocomposite substrate-supported nanofiltration membrane for efficient treatment of rare earth wastewater. *Results in Engineering*. 2023;18:101040.
22. Balcik C, Ozbey-Unal B, Sahin B, Buse Aydın E, Cifcioglu-Gozuacik B, Keyikoglu R, et al. Development of ZnFeCe Layered Double Hydroxide Incorporated Thin Film Nanocomposite Membrane with Enhanced Separation Performance and Antibacterial Properties. *Water*. 2023;15(2):264.
23. Song Y, Chen D, Liu D, Hu R, Zhang Y, Hu Y, et al. In Situ Interfacial Polymerized Arginine-Doped Polydopamine Thin-Film Nanocomposite Membranes for High-Separation and Antifouling Reverse Osmosis. *ACS Applied Materials & Interfaces*. 2023.
24. Yu J, Li Z, Xia M, Zhang L, Zhao D, Li B, et al. Green and edible cyclodextrin metal-organic frameworks modified polyamide thin film nanocomposite nanofiltration membranes for efficient desalination. *Journal of Membrane Science*. 2023;679:121714.
25. Tong Y, Wei Y, Zhang H, Wang L, Li L, Xiao F, et al. Fabrication of polyamide thin film nanocomposite membranes with enhanced desalination performance modified by silica nanoparticles formed in-situ polymerization of tetramethoxysilane. *Journal of Environmental Chemical Engineering*. 2023;11(2):109415.

26. Atashgar A, Emadzadeh D, Akbari S, Kruczek B. Incorporation of Functionalized Halloysite Nanotubes (HNTs) into Thin-Film Nanocomposite (TFN) Nanofiltration Membranes for Water Softening. *Membranes*. 2023;13(2):245.
27. Nambikkattu J, Thomas AA, Kaleekkal NJ, Arumugham T, Hasan SW, Vigneswaran S. ZnO/PDA/Mesoporous Cellular Foam Functionalized Thin-Film Nanocomposite Membrane towards Enhanced Nanofiltration Performance. *Membranes*. 2023;13(5):486.
28. Soomro F, Memon FH, Khan MA, Iqbal M, Ibrar A, Memon AA, et al. Ultrathin Graphene Oxide-Based Nanocomposite Membranes for Water Purification. *Membranes*. 2023;13(1):64.
29. de Resende NS, Ohland AL, Salim VM, Borges CP. Transport properties investigations of nanocomposite membranes incorporating titanate nanowires for water desalination. *Journal of Applied Polymer Science*. 2023;140(31):e54229.
30. Wang Z, Zhao R, Liang H, Li G, Bai L. Role of molybdenum disulfide (MoS<sub>2</sub>) nanosheets doping position on the thin-film nanocomposite (TFN) membrane during brackish water treatment. *Separation and Purification Technology*. 2023;325:124656.
31. Perry LA, Chew NGP, Grzebyk K, Cay-Durgun P, Lind ML, Sitaula P, et al. Correlating the role of nanofillers with active layer properties and performance of thin-film nanocomposite membranes. *Desalination*. 2023;550:116370.
32. Fajardo-Diaz J, Takeuchi K, Morelos-Gomez A, Cruz-Silva R, Yamanaka A, Tejima S, et al. Enhancing boron rejection in low-pressure reverse osmosis systems using a cellulose fiber-carbon nanotube nanocomposite polyamide membrane: A study on chemical structure and surface morphology. *Journal of Membrane Science*. 2023;679:121691.
33. Alam J, Shukla AK, Arockiasamy L, Alhoshan M. Scale Design of Dual-Layer Polyphenylsulfone/Sulfonated Polyphenylsulfone Hollow Fiber Membranes for Nanofiltration. *Membranes*. 2023;13(8):714.
34. Zheng H, Mou Z, Lim YJ, Liu B, Wang R, Zhang W, et al. Incorporating ionic carbon dots in polyamide nanofiltration membranes for high permselectivity and antifouling performance. *Journal of Membrane Science*. 2023;672:121401.
35. Lin W-T, Zhu C-Y, Zhou D, Li W-L, Fu P, Huang X-J, et al. Functionalized g-C<sub>3</sub>N<sub>4</sub> nanosheet interlayer enables enhanced separation performance of nanofiltration membranes. *Separation and Purification Technology*. 2023;324:124543.
36. Ee LY, Chia SYR, Li SFY. Electrospray Fabrication of Ultrathin Chlorine-Resistant Polyamide Brackish Water Desalination Membrane with Protonated Montmorillonite Nanoplates. *ACS Applied Polymer Materials*. 2023;5(12):9836-51.
37. Alambi RK, Ahmed M, Bhadrachari G, Al-Rughaib M, Thomas JP. Ethylenediamine-graphene oxide impregnated thin film nanocomposite membrane for the enhanced boron separation from seawater. *Environmental Engineering Research*. 2023;28(6).
38. Wu H, Zhao H, Lin Y, Liu X, Wang L, Yao H, et al. Positively-charged PEI/TMC nanofiltration membrane prepared by adding a diamino-silane coupling agent for Li<sup>+</sup>/Mg<sup>2+</sup> separation. *Journal of Membrane Science*. 2023;672:121468.
39. Subrahmanya T, Lin J-Y, Widakdo J, Austria HFM, Chiao Y-H, Huang T-H, et al. Effect of functionalized nanodiamonds and surfactants mediation on the nanofiltration performance of polyamide thin-film nanocomposite membranes. *Desalination*. 2023;555:116540.
40. Hosseini SM, Mohammadianfar S, Farahani SK, Solhi S. Polyether sulfone-graphite nanocomposite for nanofiltration membrane with enhanced separation, antifouling and antibacterial properties. *Korean Journal of Chemical Engineering*. 2023;40(1):185-94.
41. Razaq H, Siddique A, Farooq S, Razaque S, Ahmad B, Tahir S, et al. Hybrid ionogel membrane of PVDF incorporating ionic liquid-reduced graphene oxide for the removal of heavy metal ions from synthetic water. *Materials Science and Engineering: B*. 2023;296:116680.

42. Nchoe OB, Matshetshe K, As' Ballim M, Tetyana P, Sikhwivhilu K, Moloto N. Fabrication of Ag<sub>2</sub>S-incorporated polyamide thin film nanocomposite reverse osmosis membranes with antifouling properties. *Journal of Applied Polymer Science*. 2023;140(41):e54524.
43. Ostadi E, Mohammadi N. Does pervasive interconnected network of cellulose nanocrystals in nanocomposite membranes address simultaneous mechanical strength/water permeability/salt rejection improvement? *Carbohydrate Polymers*. 2024;325:121588.
44. Naji MA, Salimi-Kenari H, Alsahy QF, Al-Juboori RA, Huynh N, Rashid KT, et al. Novel MXene-Modified Polyphenyl Sulfone Membranes for Functional Nanofiltration of Heavy Metals-Containing Wastewater. *Membranes*. 2023;13(3):357.
45. Abdel-Naby A, Alabdullatif BA, Aldulaijan S, Alqarni Y. Synthesis and characterization of p-carboxy phenyl amino maleimide-g-cellulose acetate/ZrO<sub>2</sub> nanocomposite membrane for water desalination. *Water Reuse*. 2023;13(3):345-68.
46. Fallahnejad Z, Bakeri G, Ismail A. Incorporation of internal surface functionalized MCM-41 in thin film nanocomposite NF membrane for desalination applications. *Journal of Polymer Research*. 2023;30(8):297.
47. Xue Q, Meng W, Fang Q, Zhu J, Zhang K. Water Nanochannels in MXene Polyamide Nanofiltration Membranes: Implications for Permeability. *ACS Applied Nano Materials*. 2023.
48. Li X-H, Yang H-J, Ma Y-X, Li T-Z, Meng W-L, Zhong X-M. A novel PAN/GO electrospun nanocomposite fibrous membranes with rich amino groups for highly efficient adsorption of Au (III). *Diamond and Related Materials*. 2023;137:110175.
49. Li Y, Zhao G, Pan G, Zhang Y, Guo Y, Yu H, et al. Polyvinyl alcohol/attapulgit interlayer modulated interfacial polymerization on a highly porous PAN support for efficient desalination. *Journal of Membrane Science*. 2023;675:121517.
50. Jing Z, Wang J, Gao Z, Wang H, Tian X, Wei Y, et al. Regulation of micro-structure and surface property of SWRO membrane via introducing albumin into polyamide layer for improving permselectivity. *Desalination*. 2023;555:116551.
51. Amiri S, Sheydaei M, He T, Vatanpour V. Polyethylene-Supported Thin-Film Nanocomposite Reverse Osmosis Membranes via Oxygen Plasma Pretreatment Modification and Nanotitanium Dioxide Incorporation for Efficient As (V) Removal. *Industrial & Engineering Chemistry Research*. 2023;62(43):17959-73.
52. Alotaibi KM, Shukla AK, Bajuayfir E, Alotaibi AA, Mrad MH, Goma FA, et al. Ultrasound-Assisted Synthesis of MSNs/PS Nanocomposite Membranes for Effective Removal of Cd<sup>2+</sup> and Pb<sup>2+</sup> ions from Aqueous Solutions. *Ultrasonics Sonochemistry*. 2023:106497.
53. Isawi H. Synthesis of graphene oxide-silver (GO-Ag) nanocomposite TFC RO membrane to enhance morphology and separation performances for groundwater desalination,(case study Marsa Alam area-Red Sea). *Chemical Engineering and Processing-Process Intensification*. 2023;187:109343.
54. Abedi F, Dubé MA, Kruczek B. Adsorption of heavy metals on the surface of nanofiltration membranes: "A curse or blessing"? *Journal of Membrane Science*. 2023;685:121988.
55. Guo F, Miao J, Xu L, Zhou Q, Deng T. Conductive thin-film nanocomposite nanofiltration membrane comprising N-doped graphene quantum dots with relieved concentration polarization for sulfate separation from high-salinity solution. *Desalination*. 2023;555:116526.
56. Abedi F, Dubé MA, Emadzadeh D, Kruczek B. Improving nanofiltration performance using modified cellulose nanocrystal-based TFN membranes. *Journal of Membrane Science*. 2023;670:121369.
57. Li J, Xie Y, Cheng L, Li X, Liu F, Wang Z. Photo-Fenton reaction derived self-cleaning nanofiltration membrane with MOFs coordinated biopolymers for efficient dye/salt separation. *Desalination*. 2023;553:116459.



58. Sun Y, Yang W, Zou L, Sun L, Yang F, Dang H, et al. Thin Film Nanocomposite Membranes with Tannic Acid Functionalized MXene Nanosheets for High-Performance Nanofiltration. *ACS Applied Polymer Materials*. 2023;5(10):8099-107.
59. Zheng X, Wang T, Li S-H, Feng Y-N, Zhao Z-Z, Ren Y-S, et al. Reticulated Polyamide Thin-Film Nanocomposite Membranes Incorporated with 2D Boron Nitride Nanosheets for High-Performance Nanofiltration. *ACS Applied Materials & Interfaces*. 2023.
60. Alhoshan M, Alam J, Shukla AK, Hamid AA. Polyphenylsulfone membrane blended with polyaniline for nanofiltration promising for removing heavy metals (Cd<sup>2+</sup>/Pb<sup>2+</sup>) from wastewater. *Journal of Materials Research and Technology*. 2023;24:6034-47.
61. Hosseini Z, Kargari A. Fabrication and characterization of hydrophobic/hydrophilic dual-layer polyphenyl sulfone Janus membrane for application in direct contact membrane distillation. *Desalination*. 2024;571:117100.
62. Upreti D, Rajendran A, Lenka N, Srivastava R, Gupta RS, Maiti B, et al. Designing a robust biocompatible porous polymeric membrane using Laponite and graphene oxide for versatile and selective adsorption of water contaminants. *Chemical Engineering Journal*. 2023;464:142738.
63. Ostovar Z, Babanzadeh S, Mehdipour-Ataei S. Polysulfone/sepiolite nanocomposites and disulfonated polysulfone as desalination membranes. *Chemical Engineering Research and Design*. 2023;198:357-69.
64. Luque-Alled JM, Leaper S, Abdel-Karim A, Skuse C, Gorgojo P. PVDF membranes containing alkyl and perfluoroalkyl-functionalized graphene nanosheets for improved membrane distillation. *Journal of Environmental Chemical Engineering*. 2023;11(3):109898.
65. Meng W, Zhu J, Xue Q, Zhang K. Incorporating imine-based covalent organic frameworks nanosheet as an active filler for long-term nanofiltration desalination. *Journal of Membrane Science*. 2023:121712.
66. Liu L, Lin X, Li W, Liu X, Fan F, Yang Y, et al. Thin film composite reverse osmosis membranes with metal-organic coordination complexes stabilized CNTs interlayer for enhanced removal of trace organic contaminants. *Journal of Membrane Science*. 2023;687:122012.
67. Chandra L, Vinothkumar K, Balakrishna RG. MIL-100 (Fe) integrated fibrous polyvinyl alcohol graft on cellulose acetate towards the development of green membranes; Application in multi solute rejection. *Journal of Environmental Chemical Engineering*. 2023;11(3):109851.
68. Gu S, Zhu W, Sun B, Wang D, Zhang L. Construction of rGO@ AuNPs incorporated antifouling nanofiltration membrane with elevated filtration performance. *Journal of Environmental Chemical Engineering*. 2023;11(5):110860.
69. Wang J, Zhao X, Qu H, Xu J, Ma J. Rationally regulating the PES substrate by introducing ZIF-8 with tunable shapes for optimal thin-film composite membrane. *Applied Surface Science*. 2023;615:156181.
70. Li W-L, Lin W-T, Zhu C-Y, Fu P, Zhou D, Huang X-J, et al. High-performance thin film composite nanofiltration membranes with MoS<sub>2</sub> nanosheet interlayer. *Journal of Membrane Science*. 2023;685:121956.
71. Ahmad NA, Tam LJ, Goh PS, Azman N, Ismail AF, Jamaluddin K, et al. Treatment of radionuclide-containing wastewater using thin film composite reverse osmosis membrane with spray coating-assembled titania nanosheets. *Journal of Environmental Chemical Engineering*. 2023;11(5):110540.
72. Yang Q, Zhang L, Xie X, Sun Q, Feng J, Dong H, et al. Self-healing polyamide reverse osmosis membranes with temperature-responsive intelligent nanocontainers for chlorine resistance. *Frontiers of Chemical Science and Engineering*. 2023:1-13.
73. Batool M, Abbas MA, Khan IA, Khan MZ, Saleem M, Khan AU, et al. Response Surface Methodology Modeling Correlation of Polymer Composite Carbon Nanotubes/Chitosan Nanofiltration Membranes for Water Desalination. *ACS ES&T Water*. 2023;3(5):1406-21.

74. Siddiqa A, Haider S, Abid I, Farooq S, Ahmed N, Fazil S, et al. Preparation, characterization of PVDF/PVP/MMT mixed matrix membranes and their application for the removal of heavy metals from wastewater. *Journal of Dispersion Science and Technology*. 2023;1-14.
75. Gholami S, Rezvani A, Vatanpour V, Khoshravesh SH, Llorens J, Engel E, et al. Chlorine resistance property improvement of polyamide reverse osmosis membranes through cross-linking degree increment. *Science of The Total Environment*. 2023;889:164283.
76. Kumarage S, Munaweera I, Sandaruwan C, Weerasinghe L, Kottegoda N. Electrospun amine-functionalized silica nanoparticles–cellulose acetate nanofiber membranes for effective removal of hardness and heavy metals (As (v), Cd (ii), Pb (ii)) in drinking water sources. *Environmental Science: Water Research & Technology*. 2023;9(10):2664-79.
77. Afzal A, Shahid F, Rafique M, Nazir I. Manganese spinel ferrites-composite nanotubes impregnated thermally endured cellulose acetate membranes for superior desalination application. *Asia-Pacific Journal of Chemical Engineering*. 2023:e2914.
78. Ranjbaran H, Ameri E, Dehghani B. Preparation of dendrimer/TiO<sub>2</sub> polysulfone nanofiltration membrane to improve antibacterial, antifouling and separation performance of contaminants (heavy metals, salts, dyes). *Polymer Bulletin*. 2023:1-24.
79. Xie Y, Cheng L, Liu F, Li J. TiO<sub>2</sub>-Decorated Photocatalytic Nanofiltration Membranes for Enhanced Self-Cleaning and Separation Performance. *ACS ES&T Water*. 2023;3(10):3418-27.
80. Mi Y-F, Liu J-L, Xia W, He S-H, Shentu B-Q. In Situ Formation of Silver Nanoparticles Induced by Cl-Doped Carbon Quantum Dots for Enhanced Separation and Antibacterial Performance of Nanofiltration Membrane. *Membranes*. 2023;13(8):693.
81. Ünügül T, Nigiz FU, Karakoca B. Optimization of Pervaporative Desalination with Zirconia Based Metal Organic Framework Filled Nanocomposite Membrane. *Journal of Polymers and the Environment*. 2023:1-14.
82. Lee J, Ahn C, Chang S, Lee J, Bae T-H. Overcoming the trade-off between water flux and salt rejection of an RO membrane via simultaneous optimization using highly porous microstructured support and sulfonated porous organic polymer-based polyamide active layer. *Journal of Membrane Science*. 2023;687:122085.
83. Fang S, Guan K, Mai Z, Zhou S, Song Q, Li Z, et al. Complexation of cellulose nanocrystals and amine monomer for improved interfacial polymerization of nanofiltration membrane. *Journal of Membrane Science*. 2023;687:122048.
84. Zhao G, Zhao J, Sun J, Ding W, Zhang Q. Preparation of 'Extended Range'thin-film nanocomposite reverse osmosis membrane with excellent permeability and selectivity. *Separation and Purification Technology*. 2024;333:125945.
85. Yang H, Dong G, Qin L, Hua Q, Zhu J, Zhang Y. Polyamide nanofiltration membranes mediated by mesoporous silica nanosheet interlayers display substantial desalination performance enhancement. *Journal of Membrane Science*. 2024;693:122387.
86. Wang D, Su H, Han S, Tian M, Han L. The role of microporous metal–organic frameworks in thin-film nanocomposite membranes for nanofiltration. *Separation and Purification Technology*. 2024;333:125859.
87. Gheimasi MHM, Sadr MK, Lorestani B, Cheraghi M, Emadzadeh D, Abdollahi S. Efficiency evaluation of titanium oxide nanocomposite membrane in adsorption of chromium from oil effluents. *Environmental Monitoring and Assessment*. 2023;195(6):668.
88. Ee LY, Zhao Q, Gao J, Lim CK, Xue K, Chin SY, et al. Cyclodextrin-modified layered double hydroxide thin-film nanocomposite desalination membrane for boron removal. *Chemical Engineering Journal*. 2023;474:145723.

89. Xue Y-R, Ma Z-Y, Liu C, Zhu C-Y, Wu J, Xu Z-K. Polyamide nanofilms synthesized by a sequential process of blade coating-spraying-interfacial polymerization toward reverse osmosis. *Separation and Purification Technology*. 2023;310:123122.
90. Hussain S, Wadgama MH, Khan AL, Yasin M, Akhtar FH. Upcycling Poly (ethylene terephthalate) by Fabricating Membranes for Desalination. *ACS Sustainable Chemistry & Engineering*. 2023;11(2):726-32.
91. Bai Y, Liu B, Li J, Li M, Yao Z, Dong L, et al. Microstructure optimization of bioderived polyester nanofilms for antibiotic desalination via nanofiltration. *Science Advances*. 2023;9(18):eadg6134.
92. Lin S, Semiao AC, Zhang Y, Lu S, Lau CH. Interfacial polymerization using biobased solvents and their application as desalination and organic solvent nanofiltration membranes. *Journal of Membrane Science*. 2024;692:122281.
93. Bakhodaye Dehghanpour S, Razavi M, Parvizian F, Vatanpour V, He T. Investigation of SDS effect on the properties and performance of nanofiltration membranes prepared on polyolefin support. *Journal of the Iranian Chemical Society*. 2024;21(2):535-48.
94. Bhoje RS, Ghosh A, Nemade PR. Functionalized graphene-based material as a nanofiller for high-performance thin film composite seawater reverse osmosis membrane. *Separation Science and Technology*. 2023;58(15-16):2790-805.
95. Thummar UG, Jayalakshmi J, Saxena M, Suva Y, Nandha N, Kumar P, et al. Highly water permeable 'reverse osmosis' polyamide membrane of folded nanoscale film morphology. *Journal of Water Process Engineering*. 2023;55:104110.
96. Azmi FI, Goh PS, Ismail AF, Ahmad NA, Abidin MNZ. Enhancing the antifouling and chlorine resistance capabilities of thin-film composite reverse osmosis via surface grafting of dipeptide. *Reactive and Functional Polymers*. 2023;192:105708.
97. Fadhilah F, Alghamdi AM. High-performance thin-film composite membrane consisting of a single layer of m-phenylenediamine/trimesoyl chloride fabricated via spin-assisted molecular layer-by-layer assembly. *DESALINATION AND WATER TREATMENT*. 2023;289:14-21.
98. Swain A, Adarsh S, Biswas A, Bose S, Benicewicz BC, Kumar SK, et al. Enhanced efficiency of water desalination in nanostructured thin-film membranes with polymer grafted nanoparticles. *Nanoscale*. 2023;15(28):11935-44.
99. Luo Q, Li J, Yun P, Qian L, Zhang J, He C, et al. Thin-film composite membrane for desalination containing a sulfonated UiO-66 material. *Journal of Materials Science*. 2023;58(7):3134-46.
100. Wei S, Guo Y, Yang G, Guo H, Yan Z, Mintova S, et al. EMT-NH<sub>2</sub> zeolite interlayer induces the formation of high-performance polyamide membrane. *Chemical Engineering Journal*. 2023;472:145081.
101. Chen F, He T, Liu X. Composite nanofiltration membrane prepared by depositing barium alginate interlayer on electrospun polyacrylonitrile substrate. *Applied Surface Science*. 2023;630:157496.
102. Su W, Liu L, Chen Y, Cui J, Zhao X. Preparation of thin-film composite membrane with Turing structure by PEO-assisted interfacial polymerization combined with choline chloride modification to improve permeability. *Journal of the Taiwan Institute of Chemical Engineers*. 2023;145:104822.
103. Fu J, Xu H, Lin T, Wang A, Wang A, Yao C, et al. Tailoring the crumpled structures of a polyamide membrane with a heterostructural MXene-TiO<sub>2</sub> interlayer for high water permeability. *Desalination*. 2023;549:116352.
104. Vargas-Figueroa C, Pino-Soto L, Beratto-Ramos A, Tapiero Y, Rivas BL, Berrio ME, et al. In-Situ Modification of Nanofiltration Membranes Using Carbon Nanotubes for Water Treatment. *Membranes*. 2023;13(7):616.

105. Fu H, Wang Y, Chen Y, Hu D, Feng X, Lin Y. Liquid-solid interfacial polymerization of thin-film composite nanofiltration membrane. *Separation and Purification Technology*. 2024;334:126039.
106. Liu S, Wang Z, Zhao L, Fang W, Zhang F, Jin J. Tröger's base-regulated interfacial polymerization of polyamide nanofiltration membranes with enhanced performance. *Journal of Membrane Science*. 2023;682:121787.
107. Chen K, Zhao S, Tian B, Li F, Miao C, Teng D, et al. Hydrophilic-hydrophobic bilayer interlayer for high performance thin-film composite reverse osmosis membranes. *Journal of Membrane Science*. 2024;689:122177.
108. Chen Y, Cohen Y. RO membrane with a surface tethered polymer brush layer for enhanced rejection of nitrate, boron, and arsenic. *Journal of Membrane Science Letters*. 2023;3(2):100062.
109. Usman J, Waheed A, Baig U, Aljundi IH. The effect of altering crosslinker chemistry during interfacial polymerization on the performance of nanofiltration membranes for desalination, organic, and micropollutants removal. *Frontiers of Chemical Science and Engineering*. 2023;17(12):2025-36.
110. Fang Y, Jiang B, Hao Y, Yang N, Zhang L, Zhang C, et al. Engineering highly permeable thin-film composite nanofiltration membranes by strengthening the diffusion control of amine monomer via deep eutectic solvent. *Journal of Membrane Science*. 2023;678:121689.
111. He T, Chen F. Enhanced separation performance of composite nanofiltration membranes via electrostatic air spray PSS/PEI interlayer. *Desalination*. 2024;573:117221.
112. Zhang Y, Tan Y, Yang Y, Xu P, Chen X, Qiu M, et al. Facile fabrication of ceramic-based highly permeable composite nanofiltration membranes by in-situ interfacial polymerization. *Desalination*. 2024;573:117176.
113. Huang S, Mansouri J, McDonald JA, Khan SJ, Leslie G, Tang CY, et al. A novel single-scan printing approach for polyamide membranes by electrospray technique on polydopamine pre-coated substrate. *Journal of Membrane Science*. 2023;673:121461.
114. Guo Y, Wei S, Chen Y, Ye H, Xue S, Niu QJ. Sulfonated polyaniline interlayer with controllable doping conditions for high-performance nanofiltration. *Journal of Membrane Science*. 2023;672:121478.
115. Arshad Z, Baig N, Ali SA. Synthesis of a novel next-generation positively charged polymer and its in-situ grafting into thin film composite membranes to enhance the performance for desalination. *Process Safety and Environmental Protection*. 2023;178:34-45.
116. Hu M, Li X, Tao R, Mai Z, Chen X, Gui S, et al. Highly permeable polyamide nanofiltration membranes with crumpled structures regulated by polydopamine-piperazine-halloysite interlayer. *Desalination*. 2023;565:116862.
117. Sarkar P, Sarkar T, Singh H, Sutariya B, Ray S, Das A, et al. Microporous poly (triaminoguanidinium-amide) nanofilms with sub-nm precision for ultra-low molecular weight cut-off in nanofiltration. *Journal of Materials Chemistry A*. 2023;11(26):14390-403.
118. Li J, Gong J-L, Fang S-Y, Cao W-C, Tang S-Q, Qin M, et al. Antifouling and chemical-resistant nanofiltration membrane modulated by a functionalized MWCNT interlayer for efficient dye/salt separation at high salinity. *ACS Applied Materials & Interfaces*. 2023;15(28):34272-89.
119. Suresh D, Goh PS, Wong TW, Zhang L, Ismail AF. In-situ complexation of silver nanoparticle on thin film composite reverse osmosis membrane for improving desalination and anti-biofouling performance. *Desalination*. 2024;569:117040.
120. Gan Q, Peng LE, Yang Z, Sun P-F, Wang L, Guo H, et al. Demystifying the role of surfactant in tailoring polyamide morphology for enhanced reverse osmosis performance: Mechanistic insights and environmental implications. *Environmental Science & Technology*. 2023;57(4):1819-27.

121. Hao Z, Tian X, Mankol V, Li Q, Wang J, Wang Z, et al. Polyamide nanofiltration membrane fabricated with ultra-low concentration triaminoguanidine showing efficient desalination performance. *Journal of Membrane Science*. 2023;672:121449.
122. He Y, Zhang Y, Liang F, Zhu Y, Jin J. Chlorine resistant polyamide desalination membrane prepared via organic-organic interfacial polymerization. *Journal of Membrane Science*. 2023;672:121444.
123. Baig U, Jillani SMS, Waheed A. Decoration of  $\beta$ -Cyclodextrin and Tuning Active Layer Chemistry Leading to Nanofiltration Membranes for Desalination and Wastewater Decontamination. *Membranes*. 2023;13(5):528.
124. Bera P, Jewrajka SK. Regenerable planting of multifunctional amine: Regeneration-enhanced antifouling/antiscaling properties and performance of thin film composite nanofiltration membrane. *Journal of Membrane Science*. 2024;692:122292.
125. Vaishnavi P, Kar S, Adak A, Nagar V, Singh V, Debnath A, et al. Surface modification of thin film composite nanofiltration membrane with graphene oxide by varying amine linkers: synthesis, characterization, and applications. *Journal of Membrane Science*. 2023;687:122021.
126. Le LT, Vu PN, Nguyen HT, Van Nguyen M, Bui HT, Tran HQ, et al. An Adsorptive Membrane Based on Electrospun Graphene Oxide/Poly (vinylidene) Fluoride Fiber Coated with Chitosan for Removal of Manganese Ions from Aqueous Solutions Using a Simple Filtration Process. *Fibers and Polymers*. 2023;24(9):3047-60.
127. Bera P, Trivedi JS, Jewrajka SK. Low fouling/scaling double network thin film composite nanofiltration membranes with improved desalination performance. *Desalination*. 2023;564:116813.
128. Zhu X, Lai C, Liu B, Liu J, Xu D, Lu X, et al. Unveiling the role of post-treatment in thin-film composite nanofiltration membranes: performance and mechanism. *Desalination*. 2023;556:116579.
129. Zhao Q, Zhao DL, Ee LY, Chung T-S, Chen SB. In-situ coating of Fe-TA complex on thin-film composite membranes for improved water permeance in reverse osmosis desalination. *Desalination*. 2023;554:116515.
130. Wang Y, Zhang T, Shen K, Wang D, Wang X. Low temperature regulated reverse interfacial polymerization for fabricating thin film composite membranes based on nanofibrous substrates. *Colloids and Surfaces A: Physicochemical and Engineering Aspects*. 2024;683:133044.
131. Zhu H, Yuan B, Li Y. Preparation and Desalination of Semi-Aromatic Polyamide Reverse Osmosis Membranes (ROMs). *Polymers*. 2023;15(7):1683.
132. Ma L, Bi Q, Zhou W, Liu X, Qi F, Zhang H, et al. Nanofiltration membrane with a zwitterion-g-C<sub>3</sub>N<sub>4</sub> composite interlayer for Mg<sup>2+</sup>/Li<sup>+</sup> separation. *Journal of Water Process Engineering*. 2023;53:103751.
133. Choudhury RR, Gohil JM, Raval H. Facile approach for novel TFC-NF membranes preparation using water soluble poly (vinyl alcohol-co-styrenesulfonic acid) and their characterizations. *Separation Science and Technology*. 2023;58(15-16):2824-36.
134. Tang K, Zhu L, Lan P, Chen Y, Chen Z, Lan Y, et al. Regulating the thickness of nanofiltration membranes for efficient water purification. *Nanoscale Advances*. 2023;5(18):4770-81.
135. Li Y, Jiang C, Gong R, Liu Z, Hou Y. Modulation of charge properties inside thin-film composite polyamide membranes towards enhanced nanofiltration performance. *Journal of Environmental Chemical Engineering*. 2023;11(6):111476.
136. Wang Q, Wang Y, Huang Y, Wang H, Gao Y, Zhao M, et al. Polyethyleneimine (PEI) based positively charged thin film composite polyamide (TFC-PA) nanofiltration (NF) membranes for effective Mg<sup>2+</sup>/Li<sup>+</sup> separation. *Desalination*. 2023;565:116814.

137. Alshahrani AA, El-Habeeb AA, Almutairi AA, Almuaiter DA, Abudajeen SA, Hassan HM, et al. Preparation, Characterization and Evaluation of Polyamide-Reduced Graphene Oxide as Selective Membranes for Water Purification. *Journal of Composites Science*. 2024;8(1):24.
138. Mohammed S, Aburabie J, Hashaikeh R. Facile morphological tuning of thin film composite membranes for enhanced desalination performance. *npj Clean Water*. 2023;6(1):55.
139. Wang Q, Dong Y, Ma J, Wang H, Xue X, Bai C, et al. Polyamide/polyethylene thin film composite (PA/PE-TFC) NF membranes prepared from reverse-phase interface polymerization (RIP) for improved Mg (II)/Li (I) separation. *Desalination*. 2023;553:116463.
140. Lasisi KH, Zhang K. Retarded Interfacial Formation of Polyamine-Based Nanofiltration Membranes with Pyromellitic Acid: Separation, Acid Stability, and Antifouling Performance. *ACS Applied Polymer Materials*. 2023;5(6):4360-71.
141. Khoo YS, Nawi NSM, Liang YY, Sim LK, Lau WJ, Thamaraiselvan C. Surface modification of NF membrane via an environmentally friendly and rapid approach for desalination Process: Performance and stability evaluation. *Separation and Purification Technology*. 2024;329:125119.
142. Alghamdi MM, El-Zahhar AA. Thin-film composite polymer membranes based on nylon and halloysite: synthesis, characterization, and performance. *Chemical Papers*. 2023;77(7):3679-89.
143. Zhao G, Zhang Y, Liu Y. pH stable thin film composite poly (amine-urea) nanofiltration membranes with excellent rejection performance. *Separation and Purification Technology*. 2023;320:124108.
144. Koli M, Ranjan R, Singh SP. Functionalized graphene-based ultrafiltration and thin-film composite nanofiltration membranes for arsenic, chromium, and fluoride removal from simulated groundwater: Mechanism and effect of pH. *Process Safety and Environmental Protection*. 2023;179:603-17.
145. Fu M, Wang C, Lai X, Xiao C, Ding Y. Controllable preparation of novel PPTA/UiO-66-NH<sub>2</sub> nanofiltration membrane with nanoscale striped structure for dye wastewater separation. *Iranian Polymer Journal*. 2023;32(8):979-90.
146. Mokarinezhad N, Hosseini SS, Nxumalo EN. Development of polyamide/polyacrylonitrile thin film composite RO membranes by interfacial polymerization assisted with an aromatic/aliphatic organic solvent mixture. *Journal of Applied Polymer Science*. 2023;140(18):e53811.
147. Popova A, Boivin S, Shintani T, Fujioka T. Development of high-integrity reverse osmosis membranes for enhanced removal of microorganisms. *Desalination*. 2024;572:117155.
148. Zhang Y, Chen Y, Wang M, Su W, Li H, Li P, et al. Preparation of high temperature resistant polyamide composite nanofiltration membranes by thermally assisted interfacial polymerization. *Journal of Membrane Science*. 2023;687:122020.
149. Verbeke R, Davenport DM, Bogaerts C, Eyley S, Thielemans W, Vankelecom IF. Epoxide-based TFC membranes with tunable performance in the tight nanofiltration range. *Journal of Membrane Science Letters*. 2023;3(2):100054.
150. Chen Y, Li S-L, Cheng D, Li J, Wang M, Duan Q, et al. Thin film composite polyesteramide membrane with the incorporation of rigidly-contorted binaphthol-based monomer for enhanced nanofiltration separation performance. *Separation and Purification Technology*. 2023;322:124376.
151. Jiang C, Fei Z, Hou Y. High-performance polyamide reverse osmosis membrane containing flexible aliphatic ring for water purification. *Polymers*. 2023;15(4):944.
152. Wang E, Liu S, Liu L, Han L, Su B. Positively charged thin-film composite hollow fiber nanofiltration membrane via interfacial polymerization and branch polyethyleneimine modification for Mg<sup>2+</sup>/Li<sup>+</sup> separation. *Journal of Membrane Science Letters*. 2023;3(2):100061.

153. Wang Z, Bai L, Wang J, Liang H, Li G. Visible light-induced crosslinking enables highly permeable and chlorine-resistant polyamide membranes for water purification. *Journal of Membrane Science*. 2023;683:121819.
154. Liu Y, Hong Z, Lin S, Liu M, Yu S, Gao C. Surface room-temperature treatment of polyamide-based reverse osmosis membrane by diazotization reagent: Perm-selectivity regulation and mechanism. *Journal of Membrane Science*. 2023;684:121901.
155. Lü Z, Ding G, Liu M, Yu S, Gao C. Improved separation performance, anti-fouling property and durability of polyamide-based RO membrane by constructing a polyvinyl alcohol/polyquaternium-10 surface coating layer. *Desalination*. 2023;564:116755.
156. Jiang K, Long L, Peng LE, Yang Z, Liu W, Shin D-M, et al. Precise Regulation of Monomer Reactive Sites Enhances the Water Permeance and Membrane Selectivity of Polyamide Nanofiltration Membranes. *Industrial & Engineering Chemistry Research*. 2023;62(46):19813-21.
157. Qanati O, Dusti Z, Seyed Dorraji MS, Ahmadi A, Rasoulifard MH. Thin film composite on sulfonated PVDF electrospun and its performance in nanofiltration. *Korean Journal of Chemical Engineering*. 2023;40(5):1141-50.
158. Choi W, Shin MG, Lee GW, Kim D, Yoo CH, Lee JS, et al. Anisotropic biofouling behavior of sharkskin-patterned desalination membranes. *Journal of Membrane Science*. 2023;683:121814.
159. Gupta S, Robinson T, Evans B. Bioinspired and biomimetic membranes using ion channel proteins and designer peptides conjugated with graphene oxide for selective ion transport. *Journal of Materials Research*. 2023;38(14):3519-35.
160. Park S-J, Lee M-S, Yoon H, Kim JH, Jeon S, Shin SS, et al. Biomimetic peptoid-assisted fabrication of antibiofouling thin-film composite membranes. *Chemical Engineering Journal*. 2023;478:147468.
161. Wang Q, Sun J, Xue W, Zhao G, Ding W, Zhang K, et al. Effect of carbon nanotube nanochannel on the separation performance of thin-film nanocomposite (TFN) membranes. *Desalination*. 2023;546:116216.
162. Li X, Yang L, Torres J, Wang R. Engineering Ultra-Permeable and Antifouling Water Channel-based Biomimetic Membranes toward Sustainable Water Purification. *Journal of Membrane Science Letters*. 2023;3(2):100049.
163. Qin X, Feng X, Hu D. From asymmetry to symmetry: Biomimetic multi-channel structures for enhanced desalination using co-dissolving porogens. *Journal of Membrane Science*. 2023;685:121914.
164. Joseph J, Boussouga Y-A, Di Vincenzo M, Barboiu M, Schäfer AI. Selectivity of artificial water channel-polyamide composite membranes towards inorganic contaminants. *Journal of Membrane Science*. 2022;664:121019.
165. Cheng L, Xie Y, Li X, Liu F, Wang Y, Li J. Lecithin decorated thin film composite (TFC) nanofiltration membranes for enhanced sieving performance. *Journal of Membrane Science*. 2023;677:121632.
166. Wu Y-G, Li X-Z, Zhao J, Yang X, Cai Y-J, Jiang H, et al. Biomimetic redox-responsive smart coatings with resistance-release functions for reverse osmosis membranes. *Journal of Materials Chemistry B*. 2023;11(33):7950-60.
167. Xie L, Liu Y, Xu S, Zhang W. Enhanced Anti-Biofouling Properties of BWRO Membranes via the Deposition of Poly (Catechol/Polyamine) and Ag Nanoparticles. *Membranes*. 2023;13(5):530.
168. Yin J, Huang G, Xiao H, Chen N, An C, Chao T-C, et al. Bioinspired and dual-functional nanocellulose aerogels for water disinfection and heavy metal removal. *Nano Today*. 2023;51:101918.

169. Hu S-z, Deng Y-f, Li L, Zhang N, Huang T, Lei Y-z, et al. Biomimetic polylactic acid electrospun fibers grafted with polyethyleneimine for highly efficient methyl orange and Cr (VI) removal. *Langmuir*. 2023;39(10):3770-83.
170. Moon J, Kang H. Thermo-responsive tributyl-4-vinylbenzylphosphonium alkanesulfonate ionic liquid-based draw solute for forward osmosis. *Journal of Industrial and Engineering Chemistry*. 2024;129:413-23.
171. Hassanein A, Hafiz M, Hassan MK, Ba-Abbad MM, Maryam A-E, Alfahel R, et al. Developing sustainable draw solute for forward osmosis process using poly (amidoamine) dendrimer coated magnetic nanoparticles. *Desalination*. 2023;564:116800.
172. Kwon S-B, Jeong S, Hong S, Lee S. Support-free assembled molecular layer by layer-HPAN forward osmosis membranes. *Desalination*. 2024;570:117067.
173. Khan BE, Mahmood A, Zaman M, Lee K-H. Zinc sulfate as a draw solute in forward osmosis and its regeneration by reagent precipitation. *Desalination*. 2024;571:117087.
174. Xu Y, Wang Y-N, Chong JY, Wang R. Thermo-responsive nonionic amphiphilic copolymers as draw solutes in forward osmosis process for high-salinity water reclamation. *Water Research*. 2022;221:118768.
175. Zeng W, Yu M, Lin J, Huang L, Li J, Lin S, et al. Electrospun chitosan nanofiber constructing superhigh-water-flux forward osmosis membrane. *International Journal of Biological Macromolecules*. 2023;226:833-9.
176. Geng Z, Zhao X, Fan Y, Wang C, Huo H, Yang X, et al. Multi-functional Ag@ NH<sub>2</sub>-UiO-66/PAES-COOH self-supporting symmetric hybrid membrane for forward osmosis separation. *Journal of Membrane Science*. 2023;675:121538.
177. Zhao P, Hu Y, An X, Ji R, Liu H, Zhao H, et al. Polymeric PDI-based photocatalytic nanoarchitectures promoting the performance of thin film composite membrane for forward osmosis water purification. *Chemical Engineering Journal*. 2023;476:146747.
178. Sitabule E. Forward osmosis treatment of thermal evaporator brine stream. *Water SA*. 2023;49(1):26-35.
179. Wibisono Y, Noviani V, Ramadhani AT, Devianto LA, Sulianto AA. Eco-friendly forward osmosis membrane manufacturing using dihydrolevoglucosenone. *Results in Engineering*. 2022;16:100712.
180. Cao D-Q, Tang K, Zhang W-Y, Chang C, Han J-L, Tian F, et al. Calcium Alginate Production through Forward Osmosis with Reverse Solute Diffusion and Mechanism Analysis. *Membranes*. 2023;13(2):207.
181. Li T, Ba X, Wang X, Wang Z, Yang J, Cui Y, et al. MIL-53 (Fe)@  $\gamma$ -Al<sub>2</sub>O<sub>3</sub> nanocomposites incorporated cellulose acetate for forward osmosis membranes of high desalination performance. *Environmental Engineering Research*. 2023;28(1).
182. Devaere N, Papangelakis V. Forward Osmosis for Metal Processing Effluents under Similar Osmotic Pressure Gradients. *Membranes*. 2023;13(5):501.
183. Saud A, Saleem H, Khan AW, Munira N, Khan M, Zaidi SJ. Date Palm Tree Leaf-Derived Cellulose Nanocrystal Incorporated Thin-Film Composite forward Osmosis Membranes for Produced Water Treatment. *Membranes*. 2023;13(5):513.
184. Cifuentes-Cabezas M, García-Suarez L, Soler-Cabezas JL, Cuartas-Urbe B, Álvarez-Blanco S, Mendoza-Roca JA, et al. Feasibility of Forward Osmosis to Recover Textile Dyes Using Single Salts and Multicomponent Draw Solutions. *Membranes*. 2023;13(12):911.
185. Bassiouny M, Abdel Maksoud Y, Kimera F, Bahader K, Sewilam H. Investigating the potential of growing crops hydroponically utilizing feed and draw solutions from fertilizer drawn forward osmosis. *Environmental Sciences Europe*. 2023;35(1):68.



186. Cho Y, Kang H. Thermosensitive magnetic ionic liquids with different heterocyclic moieties as draw solutes for forward osmosis. *Desalination*. 2024;569:117045.
187. Khan K, Irfan M, Amin NU, Jiang H, Gul S. Synthesis and characterization of porous reduced graphene oxide based geopolymeric membrane with titanium dioxide coating for forward osmosis application. *Chemosphere*. 2023;313:137480.
188. Zhang X, Choi PJ, Khanzada NK, Wong PW, An AK. Highly permeable chlorine-resistant forward osmosis membrane by grafting novel sulfonamide monomers. *Desalination*. 2023;564:116754.
189. Song H-L, Zhai S-Q, Nan J, Cai W-J, Xu S-Y, Tang Y-W, et al. Dynamic relationship between membrane fouling and reverse diffusion of inorganic draw solutes in forward osmosis. *Desalination*. 2024;570:117101.
190. Sun P-F, Sarkar P, Yun E-T, Lee JH, Tang CY, Park H-D. Multi-layer structure toward simultaneous enhancement of forward osmosis membrane separation performance and anti-biofouling property. *Journal of Membrane Science*. 2023;683:121804.
191. Huang Y-w, Lee C-y, Tai N-h. Support-free multi-walled carbon nanotubes-based membrane for forward osmosis applications. *Journal of Water Process Engineering*. 2023;54:104022.
192. Yu J, Jing W, Liu E, Du S, Cai H, Du H, et al. Sulfonated graphene oxide modified polysulfone-polyamide forward osmosis membrane and its application in fluorine-containing wastewater treatment. *Materials Chemistry and Physics*. 2024;313:128757.
193. Lakra R, Bilad MR, Balakrishnan M, Basu S. Development of high-performance CuBTC MOF-based forward osmosis (FO) membranes and their cleaning strategies. *Chemical Engineering Research and Design*. 2023;190:566-79.
194. Wen H, Xu N, Soyekwo F, Dou P, Liu C. Towards enhanced performance of fertilizer-drawn forward osmosis process coupled with sludge thickening using a thin-film nanocomposite membrane interlayered with Mxene scaffolded alginate hydrogel. *Journal of Membrane Science*. 2023;685:121899.
195. Hu Y, Zhao P, Liu H, Yi X, Song W, Wang X. Photocatalytic thin film composite forward osmosis membrane for mitigating organic fouling in active layer facing draw solution mode. *Chinese Chemical Letters*. 2023;34(6):107931.
196. Abdul-Hussein ST, Alsahy QF, Al-Furaiji MH, Russo F, Chiappetta G, Di Luca G, et al. Systematic investigation of MAX phase (Ti<sub>3</sub>AlC<sub>2</sub>) modified polyethersulfone membrane performance for forward osmosis applications in desalination. *Arabian Journal of Chemistry*. 2024;17(1):105475.
197. Sun Z, Zhang S, Zhang Z, Yang Y, Zhang C, Qian Y, et al. A novel antifouling polyamide thin-film composite forward osmosis membrane fabricated by poly (m-phenylene isophthalamide) for seawater desalination. *Journal of Environmental Chemical Engineering*. 2023;11(5):110739.
198. Kim T, Lee Y, Kim E, Kim K. Fouling-resistant surface modification of forward osmosis membranes using MoS<sub>2</sub>-Ag nanofillers. *Surfaces and Interfaces*. 2023;38:102844.
199. Huang H, Zhang H, Xiao F, Liang J, Wu Y. Efficient removal of fluoride ion by the composite forward osmosis membrane with modified cellulose nanocrystal interlayer. *Results in Engineering*. 2023;20:101449.
200. Jiang L, Rastgar M, Mohammadnezhad A, Wang C, Sadrzadeh M. Development of Superpermeable Wood-Based Forward Osmosis Membranes. *ACS Sustainable Chemistry & Engineering*. 2023;11(10):4155-67.
201. Emadzadeh D, Atashgar A, Kruczek B. Novel Polyelectrolyte-Based Draw Solute That Overcomes the Trade-Off between Forward Osmosis Performance and Ease of Regeneration. *Membranes*. 2022;12(12):1270.

202. Moon J, Kang H. Anion Effect on Forward Osmosis Performance of Tetrabutylphosphonium-Based Draw Solute Having a Lower Critical Solution Temperature. *Membranes*. 2023;13(2):211.
203. Yu J, Jing W, Liu E, Du S, Cai H, Du H, et al. Effect of Polydopamine/Sodium Dodecyl Sulfate Modified Halloysite on the Microstructure and Permeability of a Polyamide Forward Osmosis Membrane. *Membranes*. 2023;13(7):638.
204. Baruah S, Patel A, Mungray AK, Mungray AA. Performance evaluation of deep eutectic solvent as a draw solute and vertical up-flow forward osmosis module for desalination of seawater. *Environmental Science and Pollution Research*. 2023;30(11):32108-16.
205. Sakai M, Nomura Y, Matsukata M. Strategy of Development on Zeolite Membrane for Forward Osmosis Operation; Effects of Structural Parameter of Support Layer and Si/Al Ratio of ZSM-5 Layer on Water Flux. *Journal of Chemical Engineering of Japan*. 2023;56(1):2251529.
206. Zhao W, Zhang X, Li C, Xu L, Meng Q, Zhang G. Polyamide Membrane Tailored by Codeposition of a UiO-66 Metal–Organic Framework Nanostructure-Based Interlayer for Forward Osmosis. *ACS Applied Nano Materials*. 2023;6(8):6901-10.
207. Zhang X, Cui H-M, Gao Y, Yan Z-W, Yan X, Chen Y, et al. Surfactant-induced intervention in interfacial polymerization to develop highly-selective thin-film composite membrane for forward osmosis process. *Desalination*. 2023;558:116617.
208. Wang X, Zhang X, Wen X, Zhao Y. Improvement of osmosis performance by n-hexane rinse: A missing parameter when developing thin film composite membrane. *Desalination*. 2023;567:116951.
209. Ren T-X, Zhang M-X, Xu Z-L, Li P-P, Pandaya D, Jin X-G, et al. Forward osmosis TFN membrane prepared by adjusting a PDA/GO-Fe<sup>3+</sup>-TA interlayer on porous CTA substrates. *Separation and Purification Technology*. 2024;330:125353.
210. Bagherzadeh M, Nikkhoo M, Ahadian MM, Bayrami A, Amini M. Polyethersulfone/polyamide thin-film nanocomposite membrane decorated by WS<sub>2</sub>-Cys-UiO-66-(CO<sub>2</sub>H)<sub>2</sub> nanocomposites for forward osmosis. *Journal of Environmental Chemical Engineering*. 2023;11(3):109959.
211. He M, Li Y, Feng L, Wang J, Liu Z, Wang L, et al. Mechanism for regulation of a forward osmosis membrane by the SA/UiO-66-NH<sub>2</sub> composite interlayer and the resulting lithium ion concentration performance. *Journal of Cleaner Production*. 2023;410:137282.
212. Asadi A, Gholami F. Implementation of layer-by-layer assembly to ameliorate dopamine-incorporated PAN nanofiltration membrane: application toward forward osmosis process. *Polymer Bulletin*. 2024;81(7):5967-90.
213. Zhou Z, Wang Q, Qin Y, Hu Y. Internal Concentration Polarization in the Polyamide Active Layer of Thin-Film Composite Membranes. *Environmental Science & Technology*. 2023;57(14):5999-6007.
214. Zhu Y, Xu Y, Chen S, Zhou Y, Zhu J, Chen G. (3-Aminopropyl) trimethoxysilane-Functionalized Titanium Dioxide Thin-Film Nanocomposite Membrane: Enhanced Rejection Performance for Unary and Binary High-Salt Wastewater. *ACS Applied Polymer Materials*. 2023;5(12):10137-47.
215. Nguyen HT, Nguyen NC, Chen S-S, Duong HC, Nguyen ML, Tran C-S, et al. Exploration of a cost-effective draw solution based on mixing surfactant and sodium chloride for forward osmosis desalination process. *Environmental Technology & Innovation*. 2023;30:103088.
216. Edokali M, Bocking R, Mehrabi M, Massey A, Harbottle D, Menzel R, et al. Chemical modification of reduced graphene oxide membranes: enhanced desalination performance and structural properties for forward osmosis. *Chemical Engineering Research and Design*. 2023;199:659-75.
217. Götz T, Achenbach B, Schiestel T. Cellulose Acetate Hollow Fiber Membranes for Forward Osmosis Using the Green Solvent Agnique AMD 3 L. *ACS Applied Polymer Materials*. 2023;5(6):4411-8.

218. Chen KK, Li W, Chew JW. Unraveling distinct FO performance of NF-like membranes fabricated by deposition of bilayers containing polyamines with minor structural differences. *ACS ES&T Water*. 2023;3(7):1902-11.
219. Kwon S-B, Kim Y, Lee S, Hong S. High-performance support-free molecular layer-by-layer assembled forward osmosis membrane incorporated with graphene oxide. *Journal of Membrane Science*. 2024;689:122152.
220. Moon J, Kang H. Effect of cation alkyl chain length on 3-sulfopropylmethacrylate-based draw solutes having lower critical solution temperature. *RSC advances*. 2023;13(12):8291-8.
221. Cho Y, Kang H. Dual-responsive imidazolium-based ionic liquid with different alkyl chains as draw solutes for forward osmosis. *Journal of Environmental Chemical Engineering*. 2023;11(3):109734.
222. Hakimi G, Shakeri A, Yassari M, Salehi H. Enhancing the permeability and fouling resistance of thin-film composite forward osmosis membranes via poly (ethylene glycol) diamine as a comonomer. *ACS Applied Polymer Materials*. 2022;5(1):567-75.
223. Lin M, Ma J, Xue X, Li S, Wang Q, Lv Z, et al. High performance cellulose acetate/polyamide (CA/PA) thin film composite forward osmotic (TFC-FO) membranes from dual solvent modification processes. *Journal of Applied Polymer Science*. 2023;140(37):e54417.
224. Hassen MA, Hamdy G, Sabry RM, Ali SS, Taher FA. Synthesis and characterization of PES/PSF/PEG by immersion precipitation for Mediterranean seawater desalination by FO membrane. *Polymer Engineering & Science*. 2023;63(2):509-20.
225. Wang X, Guo J, Li C, Wen X, Piao M, Zhang A, et al. Effects of polyethylene glycol and its block copolymer on the property and performance of the thin film composite. *Journal of Polymer Research*. 2024;31(1):3.
226. Zou W-S, Wu P, Xiao B, Chen X, Kong W, Li Y, et al. Integration of nitrogen-doped carbon dots onto active layer of forward osmosis membrane for highly efficient antibacteria and enhanced membrane performances. *Journal of Environmental Chemical Engineering*. 2023;11(2):109468.
227. Vafaei M, Farnia S, Shakeri A. Covalent organic frameworks modified with TA embedded in the membrane to improve the separation of heavy metals in the FO. *Surfaces and Interfaces*. 2023;39:102963.
228. Amini M, Haji Hosseinzadeh A, Nikkhoo M, Hosseini-fard M, Namvar A, Naslhajian H, et al. High-Performance Novel Polyoxometalate-LDH Nanocomposite-Modified Thin-Film Nanocomposite Forward Osmosis Membranes: A Study of Desalination and Antifouling Performance. *Langmuir*. 2023;39(41):14528-38.
229. Ghalavand R, Mokhtary M, Shakeri A, Alizadeh O. Polyacrylamide-grafted zinc oxide (ZnO-g-PAM) nanoparticles as a promising nanofiller for thin-film nanocomposite forward osmosis membranes. *Journal of Nanoparticle Research*. 2023;25(1):12.
230. Hakimi G, Shakeri A, Salehi H. In-situ generated ZnO nanoparticles for enhanced performance of thin film nanocomposite membrane in forward osmosis process. *Journal of Applied Polymer Science*. 2024;141(7):e54951.
231. Yassari M, Shakeri A, Karami P, Sadrzadeh M. Hydrophilic Antifouling Thin-Film Nanocomposite Forward Osmosis Membranes: Effect of Zwitterion-Functionalized Carbon Nanofiber Modification. *Industrial & Engineering Chemistry Research*. 2023;63(1):566-78.
232. Wang L, Yang H, Li H, Lu P, Yu Y, Zhang X, et al. Diazotized polyamide membranes on commercial polyethylene textile with simultaneously improved water permeance, salt rejections and anti-fouling. *Desalination*. 2023;549:116307.
233. Mazhari R, Bide Y, Hosseini SS, Shokrollahzadeh S. Modification of polyacrylonitrile TFC-FO membrane by biowaste-derived hydrophilic N-doped carbon quantum dots for enhanced water desalination performance. *Desalination*. 2023;565:116888.

234. Shafie NA, Seman MNA, Saufi SM, Mohammad AW. Influence of Polyethersulfone substrate properties on the performance of thin film composite forward osmosis membrane: Effect of additive concentration, polymer concentration and casting thickness. *Chemical Engineering Research and Design*. 2023;200:186-201.
235. Golgoli M, Farahbakhsh J, Asif AH, Khiadani M, Razmjou A, Johns ML, et al. Harnessing the power of metal-organic frameworks to develop microplastic fouling resistant forward osmosis membranes. *Journal of Membrane Science*. 2023;682:121766.
236. Rafiee H, Shakeri A, Mahdavi H. Layer-by-layer assembly of alginate/Ca<sup>2+</sup> as interlayer on microfiltration substrate: Fabrication of high selective thin-film composite forward osmosis membrane for efficient heavy metal ions removal. *Chemical Engineering Research and Design*. 2022;188:564-74.
237. Liu H, Li B, Zhao P, Xu R, Tang CY, Song W, et al. Fabrication of novel thin-film composite membrane based on ultrathin metal-organic framework interlayer for enhancing forward osmosis performance. *Chinese Chemical Letters*. 2023;34(12):108369.
238. Ma G-D, Zuo H-R, Pang S-Y, Duan M, Xiong Y, Li X-L. Anchoring polyamide active layer to improve the thermal stability of polyacrylonitrile composite forward osmosis membrane through interfacial enthalpic effect. *Separation and Purification Technology*. 2023;318:123954.
239. Halakarni MA, Samage A, Mahto A, Poliseti V, Nataraj S. Forward osmosis process for energy materials recovery from industrial wastewater with simultaneous recovery of reusable water: a sustainable approach. *Materials Today Sustainability*. 2023;22:100361.
240. Karami P, Haque Mizan MM, Khorshidi B, Aghapour Aktij S, Rahimpour A, Soares JoB, et al. Novel Forward Osmosis Membranes Engineered with Polydopamine/Graphene Oxide Interlayers: Synergistic Impact of Monomer Reactivity and Hydrophilic Interlayers. *Industrial & Engineering Chemistry Research*. 2023;62(30):11965-76.
241. Wang J, Wang L, He M, Wang X, Lv Y, Huang D, et al. Highly permeable thin film nanocomposite membrane utilizing a MoS<sub>2</sub>@ NH<sub>2</sub>-UiO-66 interlayer for forward osmosis removal of Co<sup>2+</sup>, Sr<sup>2+</sup> and Cs<sup>+</sup> nuclide ions. *Applied Surface Science*. 2023;611:155618.
242. Amini M, Nikkhoo M, Bagherzadeh M, Ahadian MM, Bayrami A, Naslhajian H, et al. High-Performance Novel MoS<sub>2</sub>@ Zeolite X Nanocomposite-Modified Thin-Film Nanocomposite Forward Osmosis Membranes: A Study of Desalination and Antifouling Performance. *ACS Applied Materials & Interfaces*. 2023;15(33):39765-76.
243. Farazin A, Shakeri A, Mahdavi H. Poly (methyl methacrylate)-block-polysulfone-poly (methyl methacrylate) Triblock Copolymer-Modified Support Layers for Forward Osmosis Membranes. *ACS Applied Polymer Materials*. 2023;5(11):8869-79.
244. Li N, Zhang Y, Li P, Zhu B, Wang W, Xu Z. Enhanced permeability and biofouling mitigation of forward osmosis membranes via grafting graphene quantum dots. *Frontiers of Chemical Science and Engineering*. 2023;17(10):1470-83.
245. Pan Z, Yang X, Liang Y, Lyu M, Huang Y, Zhou H, et al. Chromium-containing wastewater reclamation via forward osmosis with sewage sludge ash temperature-sensitive hydrogel as draw agent. *Journal of Water Process Engineering*. 2023;51:103422.
246. Zhang H, Liang J, Li Z, Xiao F, Wu Y, Zhang C. Preparation of Forward osmosis composite membrane with Chitosan/Tannic acid co-deposition interlayer and its fluoride removal performance. *Separation and Purification Technology*. 2024;330:125300.
247. Zhou Y, Shi Y, Cai D, Yan W, Zhou Y, Gao C. Support-free interfacial polymerized polyamide membrane on a macroporous substrate to reduce internal concentration polarization and increase water flux in forward osmosis. *Journal of Membrane Science*. 2024;689:122165.
248. Deka P, Roy S, Konch TJ, Bora BR, Gogoi R, Neog AB, et al. Recovering electrical energy from forward osmosis process through amorphous silicon oxide crosslinked vanadium pentoxide-reduced graphene oxide membrane. *Chemical Engineering Journal*. 2023;469:143964.

249. Zhou L, Yu H, Hossain MY, Chen F, Du C, Zhang G. Fabrication of high-performance forward osmosis membrane based on asymmetric integrated nanofiber porous support induced by a new controlled photothermal induction method. *Chemical Engineering Journal*. 2023;470:144366.
250. Kamel AH, Alsahy QF, Ibrahim SS, Faneer KA, Hashemifard SA, Jangizehi A, et al. Novel sodium and potassium carbon quantum dots as forward osmosis draw solutes: Synthesis, characterization and performance testing. *Desalination*. 2023;567:116956.
251. Ibraheem BM, AlAani S, Alsahy QF, Nemeth Z, Hernadi K. Improving surface characteristics and operational parameters of polyvinyl chloride ultrafiltration membranes: How to manipulate the performance of thin film composite forward osmosis membranes? *Desalination*. 2023;565:116896.
252. Wang X, Zhang X, Zhang H, Xiao Y, Wen X, Zhao Y. High performance Fabric-Reinforced sulfonated polysulfone supported thin film composite membrane. *Separation and Purification Technology*. 2023;325:124695.
253. Ahangar AK, Taghavijeloudar M. Desalination and extraction of high value bio-products from algal-rich seawater using Rhamnolipid as a bio draw solution in forward osmosis. *Desalination*. 2023;568:117017.
254. Ramezani M, Ellis SN, Riabtseva A, Cunningham MF, Jessop PG. CO<sub>2</sub>-Responsive Low Molecular Weight Polymer with High Osmotic Pressure as a Draw Solute for Forward Osmosis. *ACS omega*. 2023;8(51):49259-69.
255. Li Q, Zhang T, Dai Z, Su F, Xia X, Dong P, et al. A novel positively charged nanofiltration membrane stimulated by amino-functionalized MXene Ti<sub>3</sub>C<sub>2</sub>T<sub>x</sub> for high rejection of water hardness ions. *Journal of Membrane Science*. 2023;671:121385.
256. Alsalmeh A. Organic-Inorganic hybrid membrane for simultaneous heavy metal removal at drinking water pollution concentration levels. *Microchemical Journal*. 2023;195:109447.
257. Mansur S, Othman MHD, Ismail NJ, Sheikh Abdul Kadir SH, Puteh MH, Abdullah H, et al. Hybrid Inorganic Organic PSF/Hap Dual-Layer Hollow Fibre Membrane for the Treatment of Lead Contaminated Water. *Membranes*. 2023;13(2):170.
258. Deng Z, Gao J, Wang Y, Deng P, Zhang Y, Zhao L, et al. High adsorption ZIF-67/PP hybrid membrane for rapid extraction of U (VI) from water. *Colloids and Surfaces A: Physicochemical and Engineering Aspects*. 2023;674:131864.
259. Zhang Y, Gao J, Deng Z, Li Z, Wang F, Chen S, et al. Accelerating Uranium Extraction from Water via Synergy of Adsorption and Filtration by MOF Hybrid Membrane. *Advanced Sustainable Systems*. 2024;8(3):2300393.
260. Qiu H, Wang L, Ni W, Zhang Q. Facile Fabrication of Carbon Hybrid Membranes by Fast Self-Assembled Coating with Metal-Phenolic Networks for the Selective Separation of Lead from Water. *ACS ES&T Water*. 2023;3(9):3161-70.
261. Pérez-Silva I, Pérez-Hernández ME, Ibarra IS, Camacho-Mendoza RL. Evaluation of the hybrid membrane of ZnO particles supported in cellulose acetate for the removal of lead. *Membranes*. 2023;13(2):123.
262. Unlu D. Water Desalination by Pervaporation Using MIL-101 (Cr) and MIL-101 (Cr)@ GODoped PVA Hybrid Membranes. *Water, Air, & Soil Pollution*. 2023;234(2):96.
263. Xu R, Cheng S, Cheng X, Qi L, Zhong J, Liu G, et al. In situ carboxyl functionalization of hybrid organosilica reverse osmosis membranes for water desalination. *Advanced Composites and Hybrid Materials*. 2023;6(4):153.
264. Yu F, Cen L, Lei C, Zhu F, Zhou L, Zhu H, et al. Fabrication of recyclable UiO-66-NH<sub>2</sub>/PVDF hybrid fibrous membrane for Cr (VI) removal in wastewater. *Journal of Industrial and Engineering Chemistry*. 2023;123:104-15.

265. Sun B, Wu M, Zhen H, Jia Y, Li P, Yuan Z, et al. Tailored PVDF membrane with coordinated interfacial nano/micro-structure for enhanced membrane distillation. *Desalination*. 2024;573:117177.
266. Zeng S, Liu Y, Wang Y, Wang Y, Zhou Y, Li L, et al. Photo-Fenton self-cleaning carbon fibers membrane supported with Zr-MOF@ Fe<sub>2</sub>O<sub>3</sub> for effective phosphate removal from algae-rich water. *Chemosphere*. 2023;323:138175.
267. Tang S, Yang J, Wu B, Zhang J, Li J, He B, et al. Fabrication of hollow fiber nanofiltration membrane with high permselectivity based on “Co-deposition, biomineralization and dual cross-linking” process. *Journal of Membrane Science*. 2023;670:121388.
268. Poolachira S, Velmurugan S. Graphene oxide/hydrotalcite modified polyethersulfone nanohybrid membrane for the treatment of lead ion from battery industrial effluent. *Chinese Journal of Chemical Engineering*. 2023;60:253-61.
269. Ding S, Wang X. Terbium-based metal organic framework and its immobilized nanofibrous membrane for selective detection and efficient removal of phosphate. *Chemical Engineering Journal*. 2023;464:142751.
270. Zhou S, Guan K, Wang Z, Song Q, Li Z, Xu P, et al. Confined and mediated intercalation of nanoparticles in graphene oxide membrane to fine-tune desalination performance. *Chemical Engineering Journal*. 2023;465:143005.
271. García-Chirino J, Jiménez AD, Van der Bruggen B. Hybrid Na-A zeolite/oxycut residue thin film composite nanofiltration membrane for Cr (III) removal. *Journal of Environmental Chemical Engineering*. 2023;11(2):109351.
272. Zeng S, He Q, Wang Q, Si J, Cui Z. Phase-transitioned lysozyme-mediated fabrication of zeolitic imidazole framework-8 hybrid membrane with enhanced separation and antifouling properties. *Journal of Environmental Chemical Engineering*. 2023;11(5):110838.
273. Zhang S, Tan H, Yang K, Cai H, Han X. One-Dimensional Fibrous MoS<sub>2</sub> Nanosheet Hybrids for Fast and Efficient Pb<sup>2+</sup> Separation from Contaminated Water. *ACS Applied Nano Materials*. 2023;6(22):20782-92.
274. Pirzada AM, Ali I, Mallah NB, Maitlo G. Development of Novel PET-PAN Electrospun Nanocomposite Membrane Embedded with Layered Double Hydroxides Hybrid for Efficient Wastewater Treatment. *Polymers*. 2023;15(22):4388.
275. Lai Y, He J, Li Y, Zhou S, Yan W, Zhou Y, et al. Preparation of hydrophilic modified ZIF-8 and its application in the preparation of nanocomposite matrix reverse osmosis membrane with improved permeation performance. *Journal of Coatings Technology and Research*. 2024;21(2):683-92.
276. Nohtani S, Khajeh M, Oveisi AR, Moghaddam MG, Rakhshanipour M. Polytetrafluoroethylene supported polyphenol-functionalized metal-organic framework as a bio-based membrane for efficient mercury extraction from aqueous samples. *Journal of Molecular Liquids*. 2023;385:122422.
